# Supplementary material for: Discordant detection of avian influenza virus subtypes in time and space between poultry and wild birds; Towards improvement of surveillance programs
Source: PubMed Central journal article supplement (PMC5344487; doi:10.1371/journal.pone.0173470), 2017-03-09
Supplement: pone.0173470.s003.pdf [file pone.0173470.s003.pdf]

**S1 Table. The low pathogenic avian influenza viruses (LPAIV) and the accession numbers of the segments used in this study as listed in online databases GenBank and GISAID EpiFlu.**

| Viral Name                                    | Source  | Accession number | Accession number |
|-----------------------------------------------|---------|------------------|------------------|
|                                               |         | HA segment       | NA segment       |
| A/White-fronted_goose/Netherlands/1/2007_H1N1 | GenBank | KR862410         | KR862542         |
| A/Bean_goose/Netherlands/1/2007_H1N1          | GenBank | KR862411         | KR862543         |
| A/Mallard/Netherlands/26/2006_H1N1            | GenBank | KR862413         |                  |
| A/Mallard/Netherlands/64/2006_H1N1            | GenBank | KR862414         | KR862551         |
| A/Mallard/Netherlands/23/2006_H1N1            | GenBank | KR862412         |                  |
| A/Bewicks_swan/Netherlands/6/2006_H1N1        | GenBank | KR862416         |                  |
| A/Pink-footed_goose/Belgium/EMC-1/2007_H1N1   | GenBank | KR862369         | KR862390         |
| A/Eurasian_wigeon/Netherlands/2/2007_H1N1     | GenBank | KR862417         |                  |
| A/Black-headed_gull/Netherlands/1/2008_H1N3   | GenBank | KR862418         |                  |
| A/White-fronted_goose/Netherlands/4/2011_H1N1 | GenBank | KR862419         | KR862558         |
| A/Common_teal/Netherlands/3/2005_H1N1         | GenBank | KR862408         | KR862539         |
| A/Barnacle_goose/Netherlands/1/2006_H1N1      | GenBank | KR862409         | KR862540         |
| A/Eurasian_wigeon/Netherlands/6/2007_H1N1     | GenBank | KR862420         | KR862560         |
| A/Mallard/Netherlands/16/2009_H1N1            | GenBank | KR862421         | KR862577         |
| A/Mallard/Netherlands/53/2010_H1N1            | GenBank | KR862422         | KR862581         |
| A/Mallard/Netherlands/6/2012_H1N1             | GenBank | KR862423         | KR862582         |
| A/Mallard/Netherlands/7/2012_H1N1             | GenBank | KR862424         | KR862586         |
| A/Mallard/Netherlands/11/2012_H1N1            | GenBank | KR862426         | KR862590         |
| A/Mallard/Netherlands/51/2010_H1N1            | GenBank | KR862427         | KR862595         |
| A/Northern_pintail/Egypt/EMC-2/2012_H1N1      | GenBank | KR862370         | KR862392         |
| A/Northern_pintail/Egypt/EMC-3/2012_H1N1      | GenBank | KR862371         |                  |
| A/Chicken/Netherlands/11009919/2011_H1N1      | GenBank | KY676319         | KY676335         |
| A/Teal/Egypt/20431-NAMRU3/2003_H1N2           | GISAID  | EPI372275        |                  |
| A/Shoveler/Egypt/00134-NAMRU3/2005_H1N1       | GISAID  | EPI372331        |                  |
| A/Shoveler/Egypt/14029-NAMRU3/2006_H1N1       | GISAID  | EPI372378        | EPI372377        |
| A/Teal/Egypt/01351-NAMRU3/2007_H1N1           | GISAID  | EPI372466        | EPI372465        |
| A/Teal/Egypt/00677-NAMRU3/2004_H1N1           | GISAID  | EPI372528        |                  |
| A/Goose/Italy/6117/2004_H1N1                  | GISAID  | EPI178520        | EPI178522        |
| A/Mallard/Germany/R2843/06_H1N1               | GISAID  | EPI222781        |                  |
| A/Mallard/Germany-RP/R193/09_H1N1             | GISAID  | EPI248501        | EPI248500        |
| A/Wild_duck/Germany/WV30/06_H1N1              | GISAID  | EPI248514        | EPI248512        |
| A/Mallard/Germany/WV355/07_H1N1               | GISAID  | EPI248519        | EPI248517        |
| A/Wild_duck/Germany-NW/R04/08_H1N1            | GISAID  | EPI248521        |                  |
| A/Anas_platyrhynchos/Belgium/09-762/2008_H1N1 | GISAID  | EPI257212        | EPI257214        |
| A/Wild_duck/Korea/CSM38/2004b_H1N1            | GISAID  | EPI296244        |                  |
| A/Duck/Italy/7686-11/10_H1N1                  | GISAID  | EPI301849        |                  |
| A/Pintail/Italy/2703-25/06_H1N1               | GISAID  | EPI301856        |                  |
| A/Mallard/Italy/378-49/06_H1N1                | GISAID  | EPI301857        |                  |
| A/Teal/Italy/6323-5/07_H1N1                   | GISAID  | EPI301858        |                  |
| A/Mallard/Italy/432-21/08_H1N1                | GISAID  | EPI301859        |                  |
| A/Shoveler/Italy/6965-6/07_H1N3               | GISAID  | EPI301860        |                  |
| A/Turkey/Netherlands/07016245/2007_H1N5       | GenBank | KY676320         | KY676341         |
| A/Anas_crecca/Spain/1384/2007_H1N1            | GenBank | FN386464         | FN386472         |
| A/Anas_crecca/Spain/1404/2007_H1N1            | GenBank | FN386465         | FN386474         |
| A/Anas_platyrhynchos/Spain/1365/2007_H1N1     | GenBank | FN386463         | FN386471         |
| A/Bewicks_swan/Netherlands/1/2007_H1N5        | GenBank | CY076976         | CY076978         |
| A/Chicken/Guangxi/GXc-1/2011_H1N2             | GenBank | KF013910         |                  |
| A/Common_goldeneye/Mongolia/1216/2010_H1N1    | GenBank | KF501071         | KF667692         |
| A/Common_goldeneye/Mongolia/1238/2010_H1N1    | GenBank | KF501070         | KF667690         |
| A/Common_teal/Netherlands/10/2000_H1N1        | GenBank | CY060178         | CY060180         |
| A/Duck/Guangxi/GXd-1/2011_H1N2                | GenBank | KF013918         |                  |
| A/Duck/Guangxi/GXd-2/2012_H1N2                | GenBank | KF013934         |                  |
| A/Duck/Guangxi/GXd-4/2011_H1N2                | GenBank | KF013926         |                  |
| A/Duck/Hebei/843/2005_H1N2                    | GenBank | FJ536843         |                  |
| A/Duck/Hokkaido/111/2009_H1N5                 | GenBank | AB560963         | AB560964         |
| A/Duck/Hokkaido/327/2009_H1N3                 | GenBank | AB560965         |                  |
| A/Duck/Italy/1447/2005_H1N1                   | GenBank | HF563054         |                  |
| A/Duck/Italy/281904/2006_H1N1                 | GenBank | FJ432770         |                  |
| A/Duck/Italy/69238/2007_H1N1                  | GenBank | FJ432754         |                  |
| A/Duck/Korea/372/2009_H1N1                    | GenBank | KJ764732         | KJ764734         |
| A/Duck/Korea/U11-1/2007_H1N2                  | GenBank | KJ764772         |                  |
| A/Duck/Korea/U11/2007_H1N2                    | GenBank | HQ014832         |                  |
| A/Duck/Korea/U14/2007_H1N3                    | GenBank | HQ014840         |                  |
| A/Duck/Nanjing/19/2010_H1N3                   | GenBank | HQ336713         |                  |
| A/Duck/Nanjing/20/2010_H1N3                   | GenBank | HQ336721         |                  |
| A/Duck/Shimane/188/1999_H1N1                  | GenBank | CY091592         | CY091594         |
| A/Duck/Taiwan/DC167/2010_H1N3                 | GenBank | KC693623         |                  |

| Viral Name                                     | Source  | Accession number | Accession number |
|------------------------------------------------|---------|------------------|------------------|
|                                                |         | HA segment       | NA segment       |
| A/Duck/Thailand/CU-11869C/2011_H1N9            | GenBank | KJ161957         |                  |
| A/Duck/Tsukuba/718/2005_H1N1                   | GenBank | AB670330         | AB472014         |
| A/Duck/Zhejiang/0224-6/2011_H1N2               | GenBank | JN605372         |                  |
| A/Duck/Zhejiang/0607-13/2011_H1N2              | GenBank | JN605373         |                  |
| A/Duck/Zhejiang/0611-15/2011_H1N3              | GenBank | JN716320         |                  |
| A/Duck/Zhejiang/0611-17/2011_H1N3              | GenBank | JN605375         |                  |
| A/Duck/Zhejiang/0611-24/2011_H1N3              | GenBank | JN716323         |                  |
| A/Duck/Zhejiang/0611-8/2011_H1N3               | GenBank | JN605374         |                  |
| A/Duck/Zhejiang/473/2013_H1N4                  | GenBank | KF357774         |                  |
| A/Duck/Zhejiang/475/2013_H1N4                  | GenBank | KF357775         |                  |
| A/Duck/Zhejiang/476/2013_H1N4                  | GenBank | KF357776         |                  |
| A/Duck/Zhejiang/477/2013_H1N4                  | GenBank | KF357777         | KF357766         |
| A/Egyptian_goose/South_Africa/AI1448/2007_H1N8 | GenBank | GQ404705         |                  |
| A/Environment/Korea/CSM12/2007_H1N2            | GenBank | KJ764740         |                  |
| A/Environment/Korea/UP0218/2008_H1N6           | GenBank | KJ764780         |                  |
| A/Goose/Italy/296426/2003_H1N1                 | GenBank | FJ432778         | FJ432780         |
| A/Mallard/Bavaria/185-8/2008_H1N1              | GenBank | HQ259224         |                  |
| A/Mallard/Bavaria/42/2006_H1N1                 | GenBank | GU046744         | GU046745         |
| A/Mallard/Finland/14740/2008_H1N1              | GenBank | KF183609         |                  |
| A/Mallard/Korea/KNU_YP09/2009_H1N1             | GenBank | HQ897965         |                  |
| A/Mallard/Netherlands/10/1999_H1N8             | GenBank | CY060206         |                  |
| A/Mallard/Netherlands/30/2006_H1N4             | GenBank | CY076897         | CY076899         |
| A/Mallard/Republic_of_Georgia/1/2012_H1N1      | GenBank | CY185593         | CY185595         |
| A/Mallard/Republic_of_Georgia/11/2011_H1N1     | GenBank | KC190172         |                  |
| A/Mallard/Republic_of_Georgia/4/2010_H1N1      | GenBank | CY185441         |                  |
| A/Mallard/Republic_of_Georgia/4/2012_H1N1      | GenBank | CY185641         | CY185643         |
| A/Mallard/Sanjiang/390/2007_H1N1               | GenBank | CY077076         | CY077078         |
| A/Mallard/Sweden/104803/2009_H1N1              | GenBank | JX566076         | JX566260         |
| A/Mallard/Sweden/3/2002_H1N2                   | GenBank | CY060268         | CY060270         |
| A/Mallard/Sweden/51588/2006_mixed              | GenBank | CY164649         |                  |
| A/Mallard/Sweden/51880/2006_mixed              | GenBank | CY164144         |                  |
| A/Mallard/Sweden/52209/2006_mixed              | GenBank | CY164872         |                  |
| A/Mallard/Sweden/52405/2006_mixed              | GenBank | CY164156         |                  |
| A/Mallard/Sweden/57/2003_H1N1                  | GenBank | CY060329         | CY060330         |
| A/Mallard/Sweden/98/2002_H1N6                  | GenBank | CY060410         |                  |
| A/Mallard/Sweden/99769/2009_H1N1               | GenBank | JX565989         |                  |
| A/Mallard/Sweden/99818/2009_H1N1               | GenBank | JX565992         |                  |
| A/Mallard/Sweden/99842/2009_H1N1               | GenBank | JX566000         |                  |
| A/Mallard/Sweden/99857/2009_H1N1               | GenBank | JX566013         |                  |
| A/Mallard/Sweden/99859/2009_H1N2               | GenBank | JX566015         |                  |
| A/Muscovy_duck/Guangxi/GXd-3/2012_H1N2         | GenBank | KF013942         |                  |
| A/Ostrich/South_Africa/AI2887/2011_H1N2        | GenBank | JX069105         |                  |
| A/Pintail/Akita/1265/2008_H1N2                 | GenBank | AB546162         |                  |
| A/Pintail/Aomori/1130/2008_H1N3                | GenBank | AB546180         |                  |
| A/Pintail/Aomori/422/2007_H1N1                 | GenBank | AB546149         | AB546151         |
| A/Pintail/Aomori/794/2008_H1N1                 | GenBank | AB546153         | AB546155         |
| A/Pintail/Miyagi/1472/2008_H1N1                | GenBank | AB546157         | AB546159         |
| A/Pintail/Shimane/324/98_H1N9                  | GenBank | AB274304         |                  |
| A/Sparrow/Guangxi/GXs-1/2012_H1N2              | GenBank | KF013902         |                  |
| A/Swan/Hokkaido/55/1996_H1N1                   | GenBank | AB271115         | AB271116         |
| A/Swine/Hong_Kong/644/1993_H1N1                | GenBank | CY085009         |                  |
| A/Tufted_duck/Mongolia/1409/2010_H1N1          | GenBank | KF501056         |                  |
| A/WDK/JX/12416/2005_H1N1                       | GenBank | FN436023         |                  |
| A/Wild_duck/Guangdong/520/2001_H1N9            | GenBank | KF258943         |                  |
| A/Wild_duck/Korea/CSM38/2004a_H1N1             | GenBank | HQ014744         |                  |
| A/Wild_duck/Korea/CW09/2005_H1N1               | GenBank | HQ014776         |                  |
| A/Wild_duck/Korea/ESD48/2006_H1N1              | GenBank | HQ014816         |                  |
| A/Wild_duck/Korea/HDR02/2005_H1N1              | GenBank | HQ014768         |                  |
| A/Wild_duck/Korea/PJ25/2006_H1N3               | GenBank | HQ014800         |                  |
| A/Wild_duck/Korea/PSC30-20/2010_H1N1           | GenBank | KJ764764         |                  |
| A/Wild_duck/Korea/SH13/2006_H1N1               | GenBank | HQ014784         |                  |
| A/Wild_duck/Korea/SH14/2006_H1N3               | GenBank | HQ014792         |                  |
| A/Wild_duck/Korea/SH29/2006_H1N3               | GenBank | HQ014808         |                  |
| A/Wild_duck/Korea/SH60/2004_H1N1               | GenBank | HQ014760         |                  |
| A/Wild_duck/Korea/UP122/2007_H1N1              | GenBank | HQ014824         |                  |
| A/Wild_duck/Korea/YS44/2004_H1N2               | GenBank | HQ014752         |                  |
| A/Wild_waterfowl/Dongting/C2383/2012_H1N2      | GenBank | KF874481         |                  |
| A/Avian/Germany-BB/R2859/2009_H6               | GISAID  | EPI339183        |                  |
| A/Goose/Germany-BB/R1625/2008_H6               | GISAID  | EPI279941        |                  |
| A/Ringed_teal/Germany-NRW/R641/2008_H6         | GISAID  | EPI279938        |                  |

| Viral Name                                           | Source  | Accession number | Accession number |
|------------------------------------------------------|---------|------------------|------------------|
|                                                      |         | HA segment       | NA segment       |
| A/Wild_bird/Germany-HH/R1501/2008_H6                 | GISAID  | EPI279939        |                  |
| A/Wild_bird/Germany-MV/R1511/2008_H6                 | GISAID  | EPI279940        |                  |
| A/Environment/California/NWRC182841-09/2006_H6N1     | GISAID  | EPI406091        |                  |
| A/Environment/California/NWRC183200-14/2006_H6N1     | GISAID  | EPI406099        |                  |
| A/Environment/California/NWRC183274-04/2006_H6N1     | GISAID  | EPI406103        |                  |
| A/Green-winged_teal/Nova_Scotia/14917/2005_H6N1      | GISAID  | EPI327397        |                  |
| A/Larus_argentatus/Belgium/02936pcs3/2010_H6N1       | GISAID  | EPI345428        | EPI345427        |
| A/Northern_shoveler/California/HKWF115/2007_H6N1     | GISAID  | EPI154816        |                  |
| A/Duck/Germany-MV/R871/2010_H6N2                     | GISAID  | EPI339182        |                  |
| A/Green-winged_teal/Minnesota/Sg-00199/2007_H6N2     | GISAID  | EPI298290        |                  |
| A/Green-winged_teal/Minnesota/Sg-00222/2007_H6N2     | GISAID  | EPI298322        |                  |
| A/Mule_duck/Bulgaria/156/2010_H6N2                   | GISAID  | EPI574180        |                  |
| A/Mule_duck/Bulgaria/173/2009_H6N2                   | GISAID  | EPI574206        |                  |
| A/Shoveler/Egypt/13251-NAMRU3/2006_H6N2              | GISAID  | EPI372371        | EPI372370        |
| A/Teal/Egypt/13203-NAMRU3/2006_H6N2                  | GISAID  | EPI372386        | EPI372385        |
| A/Turkey/Germany/R617/2007_H6N2                      | GISAID  | EPI317612        |                  |
| A/Wild_goose/Germany-BB/R2329/2008_H6N2              | GISAID  | EPI397608        | EPI397607        |
| A/Environment/North_Carolina/NWRC183941-06/2006_H6N5 | GISAID  | EPI406114        |                  |
| A/Sentinel_mallard/Germany/Sum156/2007_H6N5          | GISAID  | EPI397610        | EPI397609        |
| A/Duck/Germany-NW/R2185/2006_H6N8                    | GISAID  | EPI397606        |                  |
| A/Environment/California/NWRC183200-06/2006_H6N8     | GISAID  | EPI406098        |                  |
| A/Goose/Germany/R1767/2007_H6N8                      | GISAID  | EPI416259        |                  |
| A/Mallard/Germany-BY/R1353/2010_H6N8                 | GISAID  | EPI339180        |                  |
| A/Mule_duck/Bulgaria/365/2010_H6N8                   | GISAID  | EPI574207        |                  |
| A/Mute_swan/Germany/R2927/2007_H6N8                  | GISAID  | EPI185339        |                  |
| A/Pink-footed_goose/Iceland/0987/2011_H6N8           | GISAID  | EPI476116        |                  |
| A/Mule_duck/Bulgaria/175/2009_H6                     | GISAID  | EPI574252        |                  |
| A/Mule_duck/Bulgaria/181/2010_H6                     | GISAID  | EPI574247        |                  |
| A/Mallard/Netherlands/78/2006_H6N8                   | GenBank | KR862436         |                  |
| A/Eurasian_wigeon/Netherlands/1/2006_H6N2            | GenBank | KR862437         | KR862610         |
| A/Mallard/Netherlands/40/2006_H6N8                   | GenBank | KR862438         |                  |
| A/White-fronted_goose/Netherlands/3/2007_H6N5        | GenBank | KR862439         | KR862694         |
| A/Mallard/Netherlands/5/2008_H6N8                    | GenBank | KR862440         |                  |
| A/Bewicks_swan/Netherlands/8/2009_H6N8               | GenBank | KR862441         |                  |
| A/White-fronted_goose/Netherlands/11/2009_H6N1       | GenBank | KR862443         | KR862556         |
| A/White-fronted_goose/Netherlands/4/2010_H6N8        | GenBank | KR862447         |                  |
| A/White-fronted_goose/Netherlands/9/2009_H6N2        | GenBank | KR862444         | KR862636         |
| A/Barnacle_goose/Netherlands/1/2010_H6N8             | GenBank | KR862445         |                  |
| A/White-fronted_goose/Netherlands/1/2010_H6N1        | GenBank | KR862446         | KR862557         |
| A/Mallard/Netherlands/2/2004_H6N8                    | GenBank | KR862428         |                  |
| A/Common_teal/Netherlands/4/2005_H6N2                | GenBank | KR862430         | KR862604         |
| A/White-fronted_goose/Netherlands/1/2006_H6N2        | GenBank | KR862431         | KR862606         |
| A/Eurasian_wigeon/Netherlands/6/2005_H6N2            | GenBank | KR862432         | KR862607         |
| A/White-fronted_goose/Netherlands/1/2005_H6N8        | GenBank | KR862433         |                  |
| A/White-fronted_goose/Netherlands/3/2006_H6N8        | GenBank | KR862434         |                  |
| A/White-fronted_goose/Netherlands/2/2008_H6N8        | GenBank | KR862455         |                  |
| A/White-fronted_goose/Netherlands/2/2007_H6N8        | GenBank | KR862456         |                  |
| A/Mallard/Netherlands/8/2008_H6N1                    | GenBank | KR862457         | KR862563         |
| A/Mallard/Netherlands/42/2008_H6N1                   | GenBank | KR862459         | KR862569         |
| A/Eurasian_wigeon/Netherlands/1/2008_H6N1            | GenBank | KR862461         | KR862573         |
| A/Common_teal/Netherlands/3/2008_H6N1                | GenBank | KR862462         | KR862575         |
| A/Mallard/Netherlands/31/2008_H6N1                   | GenBank | KR862460         | KR862572         |
| A/Mallard/Netherlands/17/2009_H6N8                   | GenBank | KR862463         |                  |
| A/Mallard/Netherlands/15/2011_H6N8                   | GenBank | KR862465         |                  |
| A/Mallard/Netherlands/20/2011_H6N8                   | GenBank | KR862466         |                  |
| A/White-fronted_goose/Netherlands/6/2009_H6N8        | GenBank | KR862470         |                  |
| A/Mallard/Netherlands/18/2010_H6N8                   | GenBank | KR862471         |                  |
| A/Chicken/Netherlands/10010413/2010_H6N1             | GenBank | KY676321         | KY676333         |
| A/Turkey/Netherlands/06001571/2006_H6N5              | GenBank | KY676322         | KY676342         |
| A/American_wigeon/California/8910/2008_H6N1          | GenBank | CY094405         |                  |
| A/American_wigeon/California/HKWF371/2007_H6N5       | GenBank | CY032704         |                  |
| A/American_wigeon/California/HKWF42/2007_H6N1        | GenBank | CY033420         |                  |
| A/American_wigeon/California/HKWF541/2007_H6N5       | GenBank | CY033436         |                  |
| A/Anas_discors/New_Mexico/A00629390/2008_H6N1        | GenBank | KF636135         |                  |
| A/Anas_discors/New_Mexico/A00706363/2008_H6N1        | GenBank | KF569944         |                  |
| A/Aquatic_bird/Korea/W69/2005_H6N5                   | GenBank | CY098532         | CY098534         |
| A/Avian/Japan/8K10135/2008_H6N5                      | GenBank | CY079243         | CY079245         |
| A/Avian/Japan/8K10195/2008_H6N8                      | GenBank | CY079211         |                  |
| A/Barnacle_goose/Netherlands/1/2005_H6N2             | GenBank | CY041386         | CY041388         |
| A/Bewicks_swan/Netherlands/1/2005_H6N2               | GenBank | DQ822190         | DQ822192         |

| Viral Name                                     | Source  | Accession number | Accession number |
|------------------------------------------------|---------|------------------|------------------|
|                                                |         | HA segment       | NA segment       |
| A/Bewicks_swan/Netherlands/2/2005_H6N8         | GenBank | DQ822198         |                  |
| A/Black-headed_gull/Netherlands/1/2005_H6N8    | GenBank | CY041378         |                  |
| A/Blue-winged_teal/Ohio/1386/2005_H6N2         | GenBank | CY081380         |                  |
| A/Blue-winged_teal/Ohio/1387/2005_H6N2         | GenBank | CY021861         |                  |
| A/Blue-winged_teal/Ohio/1918/2006_H6N5         | GenBank | CY095616         |                  |
| A/Common_gull/Norway/10_1602/2009_H6N8         | GenBank | HE802707         |                  |
| A/Common_teal/Netherlands/2/2005_H6N8          | GenBank | CY041370         |                  |
| A/Duck/Eastern_China/1/2008_H6N1               | GenBank | JF965144         |                  |
| A/Duck/Eastern_China/34/2005_H6N1              | GenBank | JF965160         | JF965335         |
| A/Duck/Eastern_China/50/2002_H6N8              | GenBank | JF965168         |                  |
| A/Duck/Eastern_China/52/2002_H6N2              | GenBank | JF965170         |                  |
| A/Duck/Eastern_China/53/2002_H6N2              | GenBank | JF965171         |                  |
| A/Duck/Eastern_China/54/2002_H6N2              | GenBank | JF965172         |                  |
| A/Duck/Eastern_China/55/2003_H6N2              | GenBank | JF965173         |                  |
| A/Duck/Eastern_China/57/2003_H6N2              | GenBank | JF965174         |                  |
| A/Duck/Eastern_China/58/2003_H6N2              | GenBank | JF965175         |                  |
| A/Duck/Eastern_China/59/2003_H6N2              | GenBank | JF965176         |                  |
| A/Duck/Eastern_China/60/2003_H6N2              | GenBank | JF965177         |                  |
| A/Duck/Guangxi/1074/2006_H6N2                  | GenBank | CY109226         |                  |
| A/Duck/Guangxi/1157/2006_H6N2                  | GenBank | CY109234         |                  |
| A/Duck/Guangxi/1248/2006_H6N2                  | GenBank | CY109242         |                  |
| A/Duck/Guangxi/141/2005_H6N2                   | GenBank | HM144510         | HM144680         |
| A/Duck/Guangxi/1455/2004_H6N5                  | GenBank | HM144533         | HM144703         |
| A/Duck/Guangxi/1533/2007_H6N2                  | GenBank | CY109618         |                  |
| A/Duck/Guangxi/1598/2005_H6N2                  | GenBank | HM144511         | HM144681         |
| A/Duck/Guangxi/2140/2006_H6N2                  | GenBank | CY109250         |                  |
| A/Duck/Guangxi/2736/2006_H6N8                  | GenBank | CY109258         |                  |
| A/Duck/Guangxi/3333/2006_H6N1                  | GenBank | CY109266         | CY109268         |
| A/Duck/Guangxi/3459/2005_H6N2                  | GenBank | HM144512         |                  |
| A/Duck/Guangxi/585/2005_H6N5                   | GenBank | HM144536         | HM144706         |
| A/Duck/Guizhou/1084/2006_H6N2                  | GenBank | CY109290         | CY109292         |
| A/Duck/Guizhou/1426/2006_H6N1                  | GenBank | CY109298         | CY109300         |
| A/Duck/Guizhou/2492/2007_H6N1                  | GenBank | CY109658         | CY109660         |
| A/Duck/Guizhou/879/2006_H6N1                   | GenBank | CY109921         | CY109922         |
| A/Duck/Guizhou/888/2006_H6N5                   | GenBank | CY109282         | CY109284         |
| A/Duck/Hokkaido/120/2001_H6N2                  | GenBank | AB286875         |                  |
| A/Duck/Hokkaido/228/2003_H6N8                  | GenBank | AB294219         |                  |
| A/Duck/Hokkaido/W2/2004_H6N8                   | GenBank | AB450441         |                  |
| A/Duck/Hunan/1469/2002_H6N8                    | GenBank | HM144552         |                  |
| A/Duck/Hunan/177/2005_H6N1                     | GenBank | HM144392         | HM144562         |
| A/Duck/Hunan/2110/2006_H6N2                    | GenBank | CY109314         |                  |
| A/Duck/Hunan/5613/2003_H6N5                    | GenBank | HM144532         | HM144702         |
| A/Duck/Hunan/573/2002_H6N2                     | GenBank | HM144461         |                  |
| A/Duck/Hunan/748/2005_H6N5                     | GenBank | HM144537         | HM144707         |
| A/Duck/Shantou/7904/2006_H6N2                  | GenBank | CY109426         |                  |
| A/Duck/Spain/539/2006_H6N8                     | GenBank | AM706353         |                  |
| A/Duck/Spain/543/2006_H6N8                     | GenBank | AM706355         |                  |
| A/Duck/Suphanburi/AI157/2005_H6N1              | GenBank | JQ711490         | JQ711488         |
| A/Duck/Taiwan/WB459/04_H6N5                    | GenBank | DQ376651         | DQ376723         |
| A/Duck/Tsukuba/561/2006_H6N1                   | GenBank | AB669136         |                  |
| A/Duck/Yunnan/3136/2006_H6N2                   | GenBank | CY109346         | CY109348         |
| A/Dunlin/Barrow/65/2005_H6N1                   | GenBank | EF655836         |                  |
| A/Environment/California/NWRC184193-25/2006_H6 | GenBank | CY122504         |                  |
| A/Environment/Colorado/NWRC183938-30/2006_H6   | GenBank | CY122496         |                  |
| A/Environment/Delaware/NWRC186237-18/2007_H6   | GenBank | CY122532         |                  |
| A/Environment/Illinois/NWRC183983-24/2006_H6N2 | GenBank | CY122500         |                  |
| A/Environment/Louisiana/NWRC186275-18/2007_H6  | GenBank | CY122535         |                  |
| A/Environment/New_York/23857/2005_H6N8         | GenBank | CY095204         |                  |
| A/Environment/New_York/32072-2/2006_H6N8       | GenBank | CY095196         |                  |
| A/Environment/New_York/NWRC183209-12/2006_H6N1 | GenBank | CY122484         |                  |
| A/Eurasian_wigeon/Netherlands/4/2000_H6N2      | GenBank | KF695262         |                  |
| A/Eurasian_wigeon/Sweden/1/2004_H6N2           | GenBank | CY041362         |                  |
| A/Glaucous_gull/Alaska/44198-119/2006_H6N1     | GenBank | HM060001         |                  |
| A/Greylag_goose/Iceland/0911/2011_H6N8         | GenBank | CY149468         |                  |
| A/Greylag_goose/Iceland/0921/2011_H6N8         | GenBank | CY149476         |                  |
| A/Greylag_goose/Iceland/0948/2011_H6N5         | GenBank | CY149500         | CY149502         |
| A/Greylag_goose/Iceland/0961/2011_H6N8         | GenBank | CY149516         |                  |
| A/Greylag_goose/Iceland/0976/2011_H6N8         | GenBank | CY149524         |                  |
| A/Greylag_goose/Iceland/0980/2011_H6N8         | GenBank | CY149532         |                  |
| A/Greylag_goose/Iceland/1459/2011_H6N5         | GenBank | CY149444         | CY149446         |

| Viral Name                                    | Source  | Accession number | Accession number |
|-----------------------------------------------|---------|------------------|------------------|
|                                               |         | HA segment       | NA segment       |
| A/Greylag_goose/Iceland/1474/2011_H6N8        | GenBank | CY149452         |                  |
| A/Greylag_goose/Iceland/1482/2011_H6N8        | GenBank | CY149460         |                  |
| A/Greylag_goose/Netherlands/4/1999_H6N1       | GenBank | CY060198         | CY060200         |
| A/Gull/Moscow/3100/2006_H6N2                  | GenBank | EU152237         | EU152239         |
| A/Mallard_duck/Minnesota/Sg-00107/2007_H6N2   | GenBank | CY034673         |                  |
| A/Mallard/California/8212/2008_H6N1           | GenBank | CY094165         |                  |
| A/Mallard/California/8293/2008_H6N1           | GenBank | CY094173         |                  |
| A/Mallard/Czech_Republic/14924-1/2007_H6N5    | GenBank | JF789626         | JF789628         |
| A/Mallard/Czech_Republic/15902-17K/2009_H6N2  | GenBank | HQ244430         |                  |
| A/Mallard/Czech_Republic/15962-1T/2010_H6N9   | GenBank | JQ737237         |                  |
| A/Mallard/Finland/13792/2007_H6N8             | GenBank | KF183620         |                  |
| A/Mallard/Hei_Longjiang/131/2006_H6N2         | GenBank | EF634340         |                  |
| A/Mallard/Jiangxi/10071/2005_H6N1             | GenBank | HM144393         | HM144563         |
| A/Mallard/Jiangxi/10668/2005_H6N1             | GenBank | HM144394         | HM144564         |
| A/Mallard/Jiangxi/12147/2005_H6N2             | GenBank | HM144516         |                  |
| A/Mallard/Jiangxi/13228/2005_H6N1             | GenBank | HM144395         | HM144565         |
| A/Mallard/Jiangxi/227/2003_H6N1               | GenBank | HM144388         | HM144558         |
| A/Mallard/Jiangxi/7787/2003_H6N1              | GenBank | HM144390         | HM144560         |
| A/Mallard/Jiangxi/8264/2004_H6N2              | GenBank | HM144489         | HM144659         |
| A/Mallard/Jiangxi/8341/2004_H6N5              | GenBank | HM144534         | HM144704         |
| A/Mallard/Jiangxi/8346/2004_H6N5              | GenBank | HM144535         | HM144705         |
| A/Mallard/Maryland/060S196/2006_H6N2          | GenBank | CY190307         |                  |
| A/Mallard/Maryland/504/2006_mixed             | GenBank | CY081404         |                  |
| A/Mallard/Minnesota/Sg-00104/2007_H6N1        | GenBank | CY078034         |                  |
| A/Mallard/Minnesota/Sg-00105/2007_H6N1        | GenBank | CY078042         |                  |
| A/Mallard/Minnesota/Sg-00106/2007_H6N2        | GenBank | CY078273         |                  |
| A/Mallard/Minnesota/Sg-00167/2007_H6N1        | GenBank | CY078114         |                  |
| A/Mallard/Minnesota/Sg-00214/2007_H6N1        | GenBank | CY035387         |                  |
| A/Mallard/Minnesota/Sg-00223/2007_H6N1        | GenBank | CY078249         |                  |
| A/Mallard/Netherlands/11/2007_H6N5            | GenBank | CY041402         | CY041404         |
| A/Mallard/Netherlands/16/99_H6N5              | GenBank | AY684892         |                  |
| A/Mallard/Netherlands/71/2006_H6N2            | GenBank | CY041394         | CY041396         |
| A/Mallard/Ontario/15915/2005_H6N5             | GenBank | CY095323         |                  |
| A/Mallard/Republic_of_Georgia/13/2011_H6N2    | GenBank | CY185577         | CY185579         |
| A/Mallard/SanJiang/113/2006_H6N2              | GenBank | EU094473         | EU094475         |
| A/Mallard/SanJiang/151/2006_H6N2              | GenBank | EF592495         |                  |
| A/Mallard/Sweden/3463/2003_H6N2               | GenBank | CY186267         | CY186269         |
| A/Mallard/Sweden/51984/2006_mixed             | GenBank | CY164804         | CY164807         |
| A/Mallard/Sweden/52/2003_H6N2                 | GenBank | CY060316         | CY060318         |
| A/Mallard/Sweden/52593/2006_mixed             | GenBank | CY164993         | CY164996         |
| A/Mallard/Sweden/54/2003_H6N1                 | GenBank | KF695223         | KF695225         |
| A/Mallard/Sweden/99817/2009_H6N2              | GenBank | JX565991         | JX566175         |
| A/Mallard/Sweden/99847/2009_H6N2              | GenBank | JX566005         |                  |
| A/Mallard/Sweden/99850/2009_H6N2              | GenBank | JX566006         |                  |
| A/Mallard/Sweden/99854/2009_H6N2              | GenBank | JX566010         |                  |
| A/Mallard/Sweden/99934/2009_H6N2              | GenBank | JX566024         |                  |
| A/Mallard/Sweden/99966/2009_H6N2              | GenBank | JX566028         |                  |
| A/Mallard/Sweden/99983/2009_H6N2              | GenBank | JX566029         |                  |
| A/Mallard/Sweden/99985/2009_H6N2              | GenBank | JX566030         |                  |
| A/Mallard/Sweden/99999/2009_H6N2              | GenBank | JX566032         | JX566216         |
| A/Mallard/Wisconsin/1534/2009_H6N8            | GenBank | CY097277         |                  |
| A/Muscovy_duck/France/09010/2009_H6N1         | GenBank | JN860172         | JN860174         |
| A/Northern_pintail/Alaska/44202-143/2006_H6N1 | GenBank | EU557517         |                  |
| A/Northern_pintail/Alaska/44203-078/2006_H6N8 | GenBank | EU557519         |                  |
| A/Northern_pintail/Alaska/44204-158/2006_H6N4 | GenBank | EU557520         |                  |
| A/Northern_shoveler/California/9187/2008_H6N2 | GenBank | CY094309         |                  |
| A/Northern_shoveler/California/K138/2005_H6N2 | GenBank | CY045343         |                  |
| A/Pintail/Alberta/87/1993_H6N8                | GenBank | CY127024         |                  |
| A/Ring-necked_duck/California/K90/2005_H6N8   | GenBank | CY043808         |                  |
| A/Shorebird/Delaware_Bay/13/2004_H6N8         | GenBank | CY127726         |                  |
| A/Shorebird/Delaware_Bay/604/2008_H6N2        | GenBank | CY127831         |                  |
| A/Shorebird/Delaware_Bay/65/2004_H6N8         | GenBank | CY127734         |                  |
| A/Shorebird/Delaware_Bay/707/2009_H6N2        | GenBank | CY127895         |                  |
| A/Teal/Norway/10_476/2005_H6N2                | GenBank | FM179757         |                  |
| A/Turkey/France/09010-1/2009_H6N1             | GenBank | JN860180         |                  |
| A/Turkey/France/10-040/2010_H6N1              | GenBank | JQ990779         | JQ990781         |
| A/Whitefronted_goose/Netherlands/1/1999_H6N1  | GenBank | CY060431         |                  |
| A/Whitefronted_goose/Netherlands/2/1999_H6N2  | GenBank | CY060439         |                  |
| A/Wild_duck/Jiangxi/8462/2006_H6N1            | GenBank | CY109338         | CY109340         |
| A/Chicken/Netherlands/11004875/2011_H7N1      | GenBank | KY676323         | KY676334         |

| Viral Name                                      | Source  | Accession number | Accession number |
|-------------------------------------------------|---------|------------------|------------------|
|                                                 |         | HA segment       | NA segment       |
| A/Duck/Turkey/55/Cetinkaya/49/2006_H7N1         | GISAID  | EPI346007        |                  |
| A/Guinea_fowl/Italy/407/2008_H7N1               | GISAID  | EPI210104        |                  |
| A/Mallard/Denmark/58-62-KLSV-119/09_H7N1        | GISAID  | EPI492308        |                  |
| A/Mallard/Italy/3397-65/2008_H7N1               | GISAID  | EPI167297        |                  |
| A/Mallard/Italy/6103-5/2007_H7N1                | GISAID  | EPI167296        |                  |
| A/Mallard/Italy/731/09_H7N1                     | GISAID  | EPI492522        |                  |
| A/Mallard/Italy/794-18/2008_H7N1                | GISAID  | EPI167299        |                  |
| A/Shoveler/Egypt/00597-NAMRU3/2004_H7N1         | GISAID  | EPI372283        | EPI372282        |
| A/Shoveler/Egypt/14879-NAMRU3/2006_H7N1         | GISAID  | EPI372363        | EPI372362        |
| A/Tadorna_tadorna/Belgium/3441-P3/2009_H7N1     | GISAID  | EPI360900        | EPI360901        |
| A/Teal/Italy/794-3/2008_H7N1                    | GISAID  | EPI167298        |                  |
| A/Chicken/Italy/2240/2003_H7N3                  | GISAID  | EPI154960        |                  |
| A/Chicken/Italy/2837-54/2007_H7N3               | GISAID  | EPI154980        |                  |
| A/Chicken/Italy/2837-58/2007_H7N3               | GISAID  | EPI154981        |                  |
| A/Chicken/Italy/8093/2002_H7N3                  | GISAID  | EPI154966        |                  |
| A/Guinea_fowl/Italy/1613/2003_H7N3              | GISAID  | EPI154959        |                  |
| A/Mallard/Italy/1336/07_H7N3                    | GISAID  | EPI167295        |                  |
| A/Mallard/Italy/6103-12/2007_H7N3               | GISAID  | EPI154982        |                  |
| A/Mallard/Italy/6104-14/2007_H7N3               | GISAID  | EPI167300        |                  |
| A/Shoveler/Egypt/00017-NAMRU3/2007_H7N3         | GISAID  | EPI372450        |                  |
| A/Shoveler/Egypt/00241-NAMRU3/2007_H7N3         | GISAID  | EPI372418        |                  |
| A/Turkey/Italy/2963/2003_H7N3                   | GISAID  | EPI243279        |                  |
| A/Turkey/Italy/8307/2002_H7N3                   | GISAID  | EPI154967        |                  |
| A/Swan/Germany/R736/06_H7N4                     | GISAID  | EPI492517        |                  |
| A/Teal/Italy/11VIR-792/11_H7N6                  | GISAID  | EPI492520        |                  |
| A/Branta_canadensis/Belgium/13000-9-2/2010_H7N7 | GISAID  | EPI360902        |                  |
| A/Chicken/Germany-NI/R874/2010_H7N7             | GISAID  | EPI302178        |                  |
| A/Chicken/Germany/R1362/11_H7N7                 | GISAID  | EPI492511        |                  |
| A/Chicken/Netherlands/11008327/2011_H7N7        | GenBank | KY676325         | KY676346         |
| A/Chicken/Netherlands/11011326/2011_H7N7        | GenBank | KY676326         | KY676347         |
| A/Chicken/Netherlands/12014794/2012_H7N7        | GISAID  | EPI390921        | EPI390922        |
| A/Egyptian_goose/Egypt/05588-NAMRU3/2006_H7N7   | GISAID  | EPI372394        | EPI372393        |
| A/Mallard/Denmark/303878-1S/13_H7N7             | GISAID  | EPI492307        |                  |
| A/Mallard/Italy/11VIR-540/11_H7N7               | GISAID  | EPI492519        |                  |
| A/Mallard/Poland/01/08_H7N7                     | GISAID  | EPI169422        | EPI169423        |
| A/Mallard/Poland/41/09_H7N7                     | GISAID  | EPI211188        |                  |
| A/Mallard/Poland/446/09_H7N7                    | GISAID  | EPI254381        | EPI254382        |
| A/Pochard/Germany/R916/06_H7N7                  | GISAID  | EPI492516        |                  |
| A/Shoveler/Egypt/09864-NAMRU3/2004_H7N7         | GISAID  | EPI372323        | EPI372322        |
| A/Swan/Germany/R57/06_H7N7                      | GISAID  | EPI492518        |                  |
| A/Teal/Egypt/00835-NAMRU3/2004_H7N7             | GISAID  | EPI372307        |                  |
| A/Turkey/Germany-NW/R655/2009_H7N7              | GISAID  | EPI356351        |                  |
| A/Shoveler/Egypt/00215-NAMRU3/2007_H7N9         | GISAID  | EPI372410        |                  |
| A/Mallard/Netherlands/82/2008_H7N7              | GenBank | KR862473         | KR862709         |
| A/Bewicks_swan/Netherlands/7/2008_H7N1          | GenBank | KR862474         | KR862554         |
| A/Mallard/Lithuania/EMC-2/2010_H7N2             | GenBank | KR862374         |                  |
| A/Mallard/Netherlands/60/2008_H7N1              | GenBank | KR862477         | KR862566         |
| A/Mallard/Netherlands/61/2008_H7N1              | GenBank |                  | KR862567         |
| A/Mallard/Netherlands/2/2009_H7N7               | GenBank | KR862479         | KR862717         |
| A/Mallard/Netherlands/4/2009_H7N7               | GenBank | KR862481         | KR862719         |
| A/Mallard/Netherlands/6/2009_H7N7               | GenBank | KR862482         | KR862720         |
| A/Eurasian_wigeon/Netherlands/2/2008_H7N4       | GenBank | KR862485         | KR862692         |
| A/Bean_goose/Netherlands/1/2009_H7N1            | GenBank | KR862487         | KR862576         |
| A/Mallard/Netherlands/2/2010_H7N3               | GenBank | KR862488         |                  |
| A/Mallard/Netherlands/3/2010_H7N3               | GenBank | KR862489         |                  |
| A/Mallard/Netherlands/1/2011_H7N7               | GenBank | KR862490         | KR862726         |
| A/Mallard/Netherlands/43/2011_H7N1              | GenBank | KR862491         |                  |
| A/Northern_shoveler/Egypt/EMC-1/2012_H7N1       | GenBank | KR862376         | KR862391         |
| A/Mallard/Netherlands/5/2010_H7N3               | GenBank | KR862500         |                  |
| A/Turkey/Netherlands/11011530/2011_H7N7         | GenBank | KY676327         | KY676348         |
| A/Chicken/Netherlands/10007882/2010_H7N4        | GenBank | KY676324         | KY676338         |
| A/Anas_crecca/Spain/1460/2008_H7N9              | GenBank | HQ244407         |                  |
| A/Anas_platyrhynchos/Spain/1877/2009_H7N2       | GenBank | KP636486         |                  |
| A/Chicken/England/1158-11406/2008_H7N7          | GenBank | FJ476173         |                  |
| A/Chicken/England/4054/2006_H7N3                | GenBank | EF467826         |                  |
| A/Chicken/England/4266/2006_H7N3                | GenBank | EF467825         |                  |
| A/Chicken/Italy/1067/99_H7N1                    | GenBank | AJ584647         |                  |
| A/Chicken/Italy/1082/1999_H7N1                  | GenBank | CY022677         | CY022679         |
| A/Chicken/Italy/1279/1999_H7N1                  | GenBank | CY099597         |                  |
| A/Chicken/Italy/12rs206-19/1999_H7N1            | GenBank | KF493039         |                  |

| Viral Name                                | Source  | Accession number | Accession number |
|-------------------------------------------|---------|------------------|------------------|
|                                           |         | HA segment       | NA segment       |
| A/Chicken/Italy/12rs206-3/1999_H7N1       | GenBank | KF492993         |                  |
| A/Chicken/Italy/12rs206-4/1999_H7N1       | GenBank | KF493027         |                  |
| A/Chicken/Italy/12rs206-5/1999_H7N1       | GenBank | KF493029         |                  |
| A/Chicken/Italy/1391/1999_H7N1            | GenBank | CY095514         |                  |
| A/Chicken/Italy/13VIR4527-11/2013_H7N7    | GISAID  | EPI677999        | EPI677998        |
| A/Chicken/Italy/270638/02_H7N3            | GenBank | EU158111         |                  |
| A/Chicken/Italy/4616/2003_H7N3            | GenBank | CY095522         |                  |
| A/Chicken/Italy/682/2003_H7N3             | GenBank | CY034750         |                  |
| A/Chicken/Netherlands/06022003/2006_H7N7  | GenBank | HE802065         | KY676343         |
| A/Chicken/Wales/1306/2007_H7N2            | GenBank | EF675618         |                  |
| A/Duck/Denmark/53-147-8/2008_H7N1         | GenBank | GQ401157         | GQ401158         |
| A/Duck/Italy/4609/2003_H7N2               | GenBank | CY031028         |                  |
| A/Duck/Italy/4692-9/2004_H7               | GenBank | CY095570         |                  |
| A/Duck/Mongolia/47/2001_H7N1              | GenBank | AB268557         | AB302788         |
| A/Duck/Mongolia/720/2007_H7N6             | GenBank | AB450448         |                  |
| A/Duck/Yunnan/87/2007_H7N6                | GenBank | KF258991         |                  |
| A/Garganey/Crimea/2027/2008_H7N8          | GenBank | GU228596         |                  |
| A/Goose/Czech_Republic/1848-K9/2009_H7N9  | GenBank | GU060482         |                  |
| A/Guinea_fowl/Italy/266184/02_H7N3        | GenBank | EU158110         |                  |
| A/Italy/3/2013_H7N7                       | GenBank | KF918337         | KF918339         |
| A/Mallard/Italy/199/01_H7N3               | GenBank | EU158109         |                  |
| A/Mallard/Italy/250/02_H7N1               | GenBank | EU158105         |                  |
| A/Mallard/Italy/299/05_H7N7               | GenBank | EU158104         |                  |
| A/Mallard/Italy/43/01_H7N3                | GenBank | AY586410         |                  |
| A/Mallard/Netherlands/12/2000_H7N3        | GenBank | KF695239         |                  |
| A/Mallard/Netherlands/22/2007_H7N1        | GenBank | CY043840         | CY043842         |
| A/Mallard/Netherlands/29/2006_H7N2        | GenBank | CY043832         | CY043834         |
| A/Mallard/Netherlands/33/2006_H7N8        | GenBank | CY041410         |                  |
| A/Mallard/Netherlands/9/2005_H7N7         | GenBank | CY077008         | CY077010         |
| A/Mallard/Republic_of_Georgia/2/2010_H7N7 | GenBank | CY185425         | CY185427         |
| A/Mallard/Republic_of_Georgia/3/2010_H7N3 | GenBank | CY185433         |                  |
| A/Mallard/Sweden/100993/2008_H7N7         | GenBank | FJ803198         | FJ803196         |
| A/Mallard/Sweden/1985/2003_H7N7           | GenBank | CY183336         | CY183338         |
| A/Mallard/Sweden/2051/2003_H7N7           | GenBank | CY184568         |                  |
| A/Mallard/Sweden/3269/2003_H7N7           | GenBank | CY184576         | CY184578         |
| A/Mallard/Sweden/5994/2005_H7N7           | GenBank | CY183409         | CY183411         |
| A/Mallard/Sweden/S90597/2005_H7N7         | GenBank | FJ803182         | FJ803175         |
| A/Mute_swan/Hungary/5973/2007_H7N7        | GenBank | GQ240813         | GQ240815         |
| A/Quail/Italy/3347/2004_H7N3              | GenBank | CY020613         |                  |
| A/Quail/Italy/4610/2003_H7N2              | GenBank | CY021509         |                  |
| A/Shoveler/Italy/2698-27/2006_H7N7        | GenBank | CY095600         |                  |
| A/Shoveler/Italy/2698-3/2006_H7N7         | GenBank | CY095592         |                  |
| A/Swan/Czech_Republic/5416/2011_H7N7      | GenBank | JN966905         | JN966907         |
| A/Swan/Slovenia/53/2009_H7N7              | GenBank | HQ283357         | HQ283359         |
| A/Teal/Finland/9201/2010_H7N3             | GenBank | KF183621         |                  |
| A/Tufted_duck/PT/13771/2006_H7N3          | GenBank | HM849003         |                  |
| A/Turkey/Germany/R11/2001_H7N7            | GenBank | CY107856         |                  |
| A/Turkey/Italy/1010/2003_H7N3             | GenBank | CY021365         |                  |
| A/Turkey/Italy/1067/1999_H7N1             | GenBank | CY095506         |                  |
| A/Turkey/Italy/1083/1999_H7N1             | GenBank | KF493003         |                  |
| A/Turkey/Italy/1086/1999_H7N1             | GenBank | KF493012         |                  |
| A/Turkey/Italy/121964/03_H7N3             | GenBank | EU158106         |                  |
| A/Turkey/Italy/1265/1999_H7N1             | GenBank | CY025189         |                  |
| A/Turkey/Italy/12rs206-1/1999_H7N1        | GenBank | KF492991         |                  |
| A/Turkey/Italy/12rs206-11/1999_H7N1       | GenBank | KF493032         |                  |
| A/Turkey/Italy/12rs206-13/1999_H7N1       | GenBank | KF493033         |                  |
| A/Turkey/Italy/12rs206-14/1999_H7N1       | GenBank | KF493037         |                  |
| A/Turkey/Italy/12rs206-17/1999_H7N1       | GenBank | KF493038         |                  |
| A/Turkey/Italy/12rs206-18/1999_H7N1       | GenBank | KF492992         |                  |
| A/Turkey/Italy/12rs206-20/1999_H7N1       | GenBank | KF493040         |                  |
| A/Turkey/Italy/12rs206-6/1999_H7N1        | GenBank | KF493031         |                  |
| A/Turkey/Italy/1555/1999_H7N1             | GenBank | KF493042         |                  |
| A/Turkey/Italy/1744/1999_H7N1             | GenBank | KF493043         |                  |
| A/Turkey/Italy/2043/2003_H7N3             | GenBank | CY022613         |                  |
| A/Turkey/Italy/214845/2002_H7N3           | GenBank | AJ627491         |                  |
| A/Turkey/Italy/2379/2000_H7N1             | GenBank | GU053007         |                  |
| A/Turkey/Italy/251/2003_H7N3              | GenBank | CY020589         |                  |
| A/Turkey/Italy/2684/2003_H7N3             | GenBank | CY095554         |                  |
| A/Turkey/Italy/2715/1999_H7N1             | GenBank | CY025173         |                  |
| A/Turkey/Italy/2716/1999_H7N1             | GenBank | KF493058         |                  |

| Viral Name                                                       | Source  | Accession number | Accession number |
|------------------------------------------------------------------|---------|------------------|------------------|
|                                                                  |         | HA segment       | NA segment       |
| A/Turkey/Italy/2732/1999_H7N1                                    | GenBank | GU052969         |                  |
| A/Turkey/Italy/2962/2003_H7N3                                    | GenBank | JX515663         |                  |
| A/Turkey/Italy/2987/2003_H7N3                                    | GenBank | CY021493         |                  |
| A/Turkey/Italy/3283/1999_H7N1                                    | GenBank | GU052976         |                  |
| A/Turkey/Italy/3337/2004_H7N3                                    | GenBank | CY021501         |                  |
| A/Turkey/Italy/3620/2003_H7N3                                    | GenBank | CY021357         |                  |
| A/Turkey/Italy/3807/2004_H7N3                                    | GenBank | CY020597         |                  |
| A/Turkey/Italy/3829/2004_H7N3                                    | GenBank | CY028676         |                  |
| A/Turkey/Italy/3889/99_H7N1                                      | GenBank | AJ493466         |                  |
| A/Turkey/Italy/4130/2004_H7N3                                    | GenBank | CY029913         |                  |
| A/Turkey/Italy/4169/1999_H7N1                                    | GenBank | CY006037         |                  |
| A/Turkey/Italy/4372/2004_H7N3                                    | GenBank | CY095538         |                  |
| A/Turkey/Italy/4479/2004_H7N3                                    | GenBank | CY020581         |                  |
| A/Turkey/Italy/4603/99_H7N1                                      | GenBank | AJ493471         |                  |
| A/Turkey/Italy/4608/2003_H7N3                                    | GenBank | CY021485         |                  |
| A/Turkey/Italy/68819/03_H7N3                                     | GenBank | EU158100         |                  |
| A/Turkey/Italy/8000/2002_H7N3                                    | GenBank | CY024738         |                  |
| A/Turkey/Italy/8458/2002_H7N3                                    | GenBank | CY095562         |                  |
| A/Turkey/Italy/8534/2002_H7N3                                    | GenBank | CY095530         |                  |
| A/Turkey/Italy/8912/2002_H7N3                                    | GenBank | CY020605         |                  |
| A/Turkey/Italy/9739/2002_H7N3                                    | GenBank | CY031611         |                  |
| A/Turkey/Italy/977/1999_H7N1                                     | GenBank | GU052999         |                  |
| A/Turkey/Italy12rs206-2/1999_H7N1                                | GenBank | KF492994         |                  |
| A/Wild_duck/Mongolia/1-241/2008_H7N9                             | GenBank | JN029686         |                  |
| A/Yellow-legged_gull/Republic_of_Georgia/1/2012_mixed            | GenBank | CY185372         |                  |
| A/Northern_shoveler/Mississippi/110S5900/2011_H8N1               | GISAID  | EPI512596        |                  |
| A/American_black_duck/Nova_Scotia/02043/2007_H8N4                | GISAID  | EPI404484        |                  |
| A/American_green-winged_teal/California/44287-373/2007_H8N4      | GISAID  | EPI292438        |                  |
| A/American_green-winged_teal/Interior_Alaska/9BM5045R0/2009_H8N4 | GISAID  | EPI433069        | EPI433100        |
| A/Chicken/Netherlands/10009401/2010_H8N4                         | GenBank | KY676328         | KY676340         |
| A/Environment/Pennsylvania/NWRC182092-24/2006_H8N4               | GISAID  | EPI406002        |                  |
| A/Garganey/Ukraine/05835-NAMRU3/2006_H8N4                        | GISAID  | EPI372512        | EPI372511        |
| A/Mallard/Interior_Alaska/8BM1966R1/2008_H8N4                    | GISAID  | EPI299970        |                  |
| A/Mallard/Interior_Alaska/8MPO547/2008_H8N4                      | GISAID  | EPI299411        |                  |
| A/Mallard/Interior_Alaska/9BM10537R0/2009_H8N4                   | GISAID  | EPI436880        |                  |
| A/Mallard/Interior_Alaska/9BM8389R0/2009_H8N4                    | GISAID  | EPI452280        | EPI452282        |
| A/Mallard/Minnesota/Sg-00675/2008_H8N4                           | GISAID  | EPI188649        |                  |
| A/Northern_pintail/Interior_Alaska/8BM2011R1/2008_H8N4           | GISAID  | EPI299978        |                  |
| A/Northern_pintail/Interior_Alaska/8BM2046R1/2008_H8N4           | GISAID  | EPI299419        |                  |
| A/Northern_pintail/Interior_Alaska/8BM2621R1/2008_H8N4           | GISAID  | EPI299686        |                  |
| A/Northern_pintail/Interior_Alaska/8BM2987/2008_H8N4             | GISAID  | EPI299122        |                  |
| A/Northern_pintail/Interior_Alaska/8BM3088/2008_H8N4             | GISAID  | EPI299146        |                  |
| A/Northern_pintail/Interior_Alaska/8BM3091/2008_H8N4             | GISAID  | EPI299694        |                  |
| A/Northern_pintail/Interior_Alaska/8BM3137/2008_H8N4             | GISAID  | EPI299702        |                  |
| A/Northern_pintail/Interior_Alaska/8MPO689/2008_H8N4             | GISAID  | EPI299090        |                  |
| A/Northern_pintail/Interior_Alaska/9BM11556R0/2009_H8N4          | GISAID  | EPI452128        |                  |
| A/Northern_pintail/Interior_Alaska/9BM11643R0/2009_H8N4          | GISAID  | EPI452142        | EPI452144        |
| A/Northern_pintail/Interior_Alaska/9BM6510R0/2009_H8N4           | GISAID  | EPI452001        | EPI452003        |
| A/Northern_pintail/Interior_Alaska/9BM7152R2/2009_H8N4           | GISAID  | EPI452015        | EPI452017        |
| A/Northern_pintail/Interior_Alaska/9BM7240R0/2009_H8N4           | GISAID  | EPI452050        |                  |
| A/Northern_pintail/Interior_Alaska/9BM7882R0/2009_H8N4           | GISAID  | EPI452219        |                  |
| A/Northern_pintail/Interior_Alaska/9BM8109R0/2009_H8N4           | GISAID  | EPI436940        |                  |
| A/Northern_pintail/Interior_Alaska/9BM8237R0/2009_H8N4           | GISAID  | EPI452226        |                  |
| A/Northern_pintail/Interior_Alaska/9BM8967R0/2009_H8N4           | GISAID  | EPI436976        |                  |
| A/Northern_shoveler/California/AKS273/2007_H8N4                  | GISAID  | EPI178742        |                  |
| A/Northern_shoveler/California/HKWF1203/2007_H8N4                | GISAID  | EPI222411        |                  |
| A/Northern_shoveler/California/HKWF1204/2007_H8N4                | GISAID  | EPI178782        |                  |
| A/Northern_shoveler/California/HKWF1325/2007_H8N4                | GISAID  | EPI160322        |                  |
| A/Northern_shoveler/Interior_Alaska/9BM2925R0/2009_H8N4          | GISAID  | EPI432837        |                  |
| A/Northern_shoveler/Minnesota/Sg-00648/2008_H8N4                 | GISAID  | EPI449391        |                  |
| A/Mallard/Netherlands/14/2006_H8N4                               | GenBank | KR862502         |                  |
| A/Chicken/Netherlands/11004004/2011_H8N4                         | GenBank | KY676329         | KY676339         |
| A/American_black_duck/Illinois/4119/2009_H8N4                    | GenBank | CY097534         |                  |
| A/Anas_crecca/Spain/1459/2008_H8N4                               | GenBank | FN386466         | FN386475         |
| A/Common_teal/Netherlands/1/2005_H8N4                            | GenBank | CY041258         | CY041260         |
| A/Duck/Alaska/702/1991_H8N2                                      | GenBank | CY015173         |                  |
| A/Duck/Hokkaido/207/2014_H8N2                                    | GenBank | LC029898         |                  |
| A/Duck/Hokkaido/95/1981_H8N4                                     | GenBank | AB450454         | AB450455         |
| A/Duck/LA/B174/1986_H8N4                                         | GenBank | GU186458         |                  |
| A/Duck/Thailand/SP-355/2007_H8N4                                 | GenBank | FJ802406         | FJ802407         |



| Viral Name                                      | Source  | Accession number | Accession number |
|-------------------------------------------------|---------|------------------|------------------|
|                                                 |         | HA segment       | NA segment       |
| A/Duck/Tsukuba/255/2005_H8N5                    | GenBank | AB669137         | AB472028         |
| A/Duck/Yangzhou/Q2/2005_H8N4                    | GenBank | EF061122         | EF061126         |
| A/Mallard_duck/Alberta/7/1987_H8N4              | GenBank | CY014583         |                  |
| A/Mallard/Alaska/708/2005_H8N4                  | GenBank | CY017749         | CY017751         |
| A/Mallard/ALB/194/1992_H8N4                     | GenBank | CY005972         |                  |
| A/Mallard/Alberta/283/1977_H8N4                 | GenBank | CY005970         | AY207531         |
| A/Mallard/Interior_Alaska/8BM3061/2008_H8N4     | GenBank | CY079099         |                  |
| A/Mallard/Interior_Alaska/8BM3327/2008_H8N4     | GenBank | CY080025         |                  |
| A/Mallard/Interior_Alaska/8BM3584R1/2008_H8N4   | GenBank | CY079677         |                  |
| A/Mallard/Interior_Alaska/8MP0457R1/2008_H8N4   | GenBank | CY079963         |                  |
| A/Mallard/Minnesota/AI09-1833/2009_H8N4         | GenBank | CY140663         | CY140665         |
| A/Mallard/Minnesota/AI09-1854/2009_H8N4         | GenBank | CY140671         |                  |
| A/Mallard/Minnesota/AI09-1867/2009_H8N4         | GenBank | CY140679         |                  |
| A/Mallard/Minnesota/Sg-00062/2007_H8N4          | GenBank | CY064121         |                  |
| A/Mallard/Minnesota/Sg-00570/2008_H8N4          | GenBank | CY139985         |                  |
| A/Mallard/Minnesota/Sg-00571/2008_mixed         | GenBank | CY139994         |                  |
| A/Mallard/Minnesota/Sg-00678/2008_H8N4          | GenBank | CY042859         |                  |
| A/Mallard/Minnesota/SG-00680/2008_mixed         | GenBank | CY140079         |                  |
| A/Mallard/Minnesota/SG-00684/2008_H8N4          | GenBank | CY140088         |                  |
| A/Mallard/Minnesota/Sg-00686/2008_H8N4          | GenBank | CY140096         |                  |
| A/Mallard/Minnesota/Sg-00688/2008_H8N4          | GenBank | CY042898         |                  |
| A/Mallard/Minnesota/Sg-00690/2008_H8N4          | GenBank | CY042906         |                  |
| A/Mallard/Minnesota/Sg-00701/2008_H8N4          | GenBank | CY140342         |                  |
| A/Mallard/Netherlands/1/2006_H8N4               | GenBank | CY043848         | CY043850         |
| A/Mallard/Sweden/101165/2009_H8N4               | GenBank | CY183572         | CY183574         |
| A/Mallard/Sweden/24/2002_H8N4                   | GenBank | CY060249         | CY064796         |
| A/Mallard/Sweden/2834/2003_H8N4                 | GenBank | CY183368         | CY183370         |
| A/Mallard/Sweden/2990/2003_H8N4                 | GenBank | CY183441         | CY183443         |
| A/Mallard/Sweden/3240/2003_H8N4                 | GenBank | CY183449         | CY183451         |
| A/Mallard/Sweden/3244/2003_H8N4                 | GenBank | CY183457         | CY183459         |
| A/Mallard/Sweden/4486/2004_H8N4                 | GenBank | CY183465         | CY183467         |
| A/Mallard/Sweden/4737/2004_mixed                | GenBank | CY183474         |                  |
| A/Mallard/Sweden/50055/2006_H8N4                | GenBank | CY183515         | CY183517         |
| A/Mallard/Sweden/51156/2006_H8N4                | GenBank | CY183523         | CY183525         |
| A/Mallard/Sweden/51671/2006_H8N4                | GenBank | CY184600         | CY184602         |
| A/Mallard/Sweden/5389/2005_H8N4                 | GenBank | CY183483         | CY183485         |
| A/Mallard/Sweden/541/2002_H8N4                  | GenBank | CY184592         |                  |
| A/Mallard/Sweden/58256/2006_H8N4                | GenBank | CY183531         | CY183533         |
| A/Mallard/Sweden/59475/2007_H8N4                | GenBank | CY183539         | CY183541         |
| A/Mallard/Sweden/60041/2007_H8N2                | GenBank | CY183425         |                  |
| A/Mallard/Sweden/68537/2007_mixed               | GenBank | CY183555         |                  |
| A/Mallard/Sweden/7242/2004_H8N4                 | GenBank | CY183491         | CY183493         |
| A/Mallard/Sweden/7996/2005_H8N4                 | GenBank | CY183499         | CY183501         |
| A/Mallard/Sweden/8005/2005_H8N4                 | GenBank | CY183507         | CY183509         |
| A/Mallard/Sweden/99377/2009_H8N4                | GenBank | CY183564         | CY183566         |
| A/Mallard/Wisconsin/110S4489/2011_H8N4          | GenBank | CY166162         |                  |
| A/Mallard/Wisconsin/2080/1984_H8N4              | GenBank | CY178863         |                  |
| A/Mallard/Wisconsin/2086/1984_H8N4              | GenBank | CY178214         | CY178216         |
| A/Mallard/Wisconsin/426/1979_H8N4               | GenBank | CY180660         | CY180662         |
| A/Northern_pintail/Alaska/44204-073/2006_H8N4   | GenBank | EU557521         |                  |
| A/Northern_pintail/Alaska/44340-503/2007_H8N4   | GenBank | GU168306         |                  |
| A/Northern_pintail/Alaska/44420-106/2008_H8     | GenBank | GU168307         |                  |
| A/Northern_pintail/Alaska/44500-066/2009_H8N4   | GenBank | JX080768         |                  |
| A/Northern_shoveler/Netherlands/1/2006_H8N4     | GenBank | CY077024         | CY077026         |
| A/Pintail_duck/Alberta/114/1979_H8N4            | GenBank | CY005971         |                  |
| A/Pintail/Alaska/246/2005_mixed                 | GenBank | CY096764         | CY096768         |
| A/Pintail/Barrow/140/2005_H8N4                  | GenBank | EF655844         |                  |
| A/Pintail/Barrow/38/2005_H8N4                   | GenBank | EF655828         |                  |
| A/Ruddy_shelduck/Mongolia/592/2010_H8N6         | GenBank | KF501097         |                  |
| A/Ruddy_shelduck/Mongolia/593/2010_H8N4         | GenBank | KF501064         |                  |
| A/Teal/Chany/444/2009_H8N8                      | GenBank | CY098524         |                  |
| A/Turkey/Colorado/235497/2003_H8N4              | GenBank | GU051909         |                  |
| A/Turkey/Ontario/6118/1968_H8N4                 | GenBank | CY130046         | EU429793         |
| A/Teal/Northern_Ireland/14567-10-5257/2007_H9N1 | GISAID  | EPI383878        |                  |
| A/Common_coot/Poland/88/13_H9N2                 | GISAID  | EPI505111        |                  |
| A/Mallard/Iran/C364/2007_H9N2                   | GISAID  | EPI302559        |                  |
| A/Turkey/England/13437/2013_H9N2                | GISAID  | EPI585514        |                  |
| A/Turkey/England/13538/2013_H9N2                | GISAID  | EPI585519        |                  |
| A/Turkey/Poland/14/13_H9N2                      | GISAID  | EPI500817        |                  |
| A/Turkey/Poland/20/13_H9N2                      | GISAID  | EPI505105        |                  |

| Viral Name                                      | Source  | Accession number | Accession number |
|-------------------------------------------------|---------|------------------|------------------|
|                                                 |         | HA segment       | NA segment       |
| A/Ruddy_turnstone/New_Jersey/AI03-128/2003_H9N7 | GISAID  | EPI454831        |                  |
| A/Ruddy_turnstone/New_Jersey/AI03-444/2003_H9N9 | GISAID  | EPI454810        |                  |
| A/Mallard/Netherlands/1/2005_H9N2               | GenBank | KR862503         |                  |
| A/Gadwall/Netherlands/2/2006_H9N2               | GenBank | KR862504         |                  |
| A/Chicken/Netherlands/10020245/2010_H9N2        | GenBank | KY676330         | KY676337         |
| A/Baikal_teal/Xianghai/421/2011_H9N2            | GenBank | KC162234         |                  |
| A/Bewicks_swan/Netherlands/5/2007_H9N2          | GenBank | CY041274         |                  |
| A/Chicken/Korea/25232-96006/1996_H9N2           | GenBank | KF188387         | KF188388         |
| A/Chicken/Korea/25232-MS96CE6/1996_H9N2         | GenBank | KF188345         |                  |
| A/Chicken/Korea/AI-96004/1996_H9N2              | GenBank | GU053194         |                  |
| A/Chicken/Korea/GH2/2007_H9N2                   | GenBank | HQ871933         | HQ871935         |
| A/Chicken/Korea/MS96-CE6/1996_H9N2              | GenBank | GU053186         | GU053188         |
| A/Common_murre/Oregon/19497-004/2005_H9N5       | GenBank | CY075925         | CY075927         |
| A/Duck/Chiba/1/2007_H9N2                        | GenBank | AB874675         |                  |
| A/Duck/Germany/113/1995_H9N2                    | GenBank | HE802066         |                  |
| A/Duck/Henan/03/2009_H9N2                       | GenBank | KJ162122         |                  |
| A/Duck/Hokkaido/13/00_H9N2                      | GenBank | AB276111         | AB276112         |
| A/Duck/Hokkaido/238/2008_H9N2                   | GenBank | AB485600         |                  |
| A/Duck/Hokkaido/49/98_H9N2                      | GenBank | AB125928         |                  |
| A/Duck/Hokkaido/9/99_H9N2                       | GenBank | AB262463         | AB262465         |
| A/Duck/Hokkaido/HY57/2005_H9N4                  | GenBank | AB455035         | AB455036         |
| A/Duck/Hokkaido/K04/2014_H9N2                   | GenBank | LC042043         |                  |
| A/Duck/Hong_Kong/Y439/1997_H9N2                 | GenBank | KF188265         |                  |
| A/Duck/Italy/260/2004_H9N8                      | GenBank | JX273564         |                  |
| A/Duck/Shantou/1588/00_H9N1                     | GenBank | AF523389         |                  |
| A/Duck/Shantou/2030/00_H9N1                     | GenBank | AF523390         |                  |
| A/Duck/Thailand/CU-8319T/2010_H9N7              | GenBank | KF591855         | KF591857         |
| A/Duck/Viet_Nam/340/2001_H9N3                   | GenBank | EF541420         |                  |
| A/Duck/Viet_Nam/68/2001_H9N3                    | GenBank | EF541419         |                  |
| A/Environment/Bangladesh/1041/2009_H9N2         | GenBank | KC757809         |                  |
| A/Eurasian_wigeon/Netherlands/4/2005_H9N2       | GenBank | HM136574         | KR862602         |
| A/Gadwall/Netherlands/1/2006_H9N2               | GenBank | CY043864         | CY043866         |
| A/Knot/England/497/2002_H9N9                    | GenBank | JX273565         |                  |
| A/Laughing_gull/Delaware_Bay/5/2003_H9N1        | GenBank | CY102720         |                  |
| A/Mallard/Austria/WV1090234/2007_H9N2           | GenBank | GU194485         |                  |
| A/Mallard/England/7798-6499/2006_H9N2           | GenBank | JX273566         |                  |
| A/Mallard/Finland/10940/2009_H9N2               | GenBank | KF183626         |                  |
| A/Mallard/Finland/13353/2010_H9N2               | GenBank | KF183630         |                  |
| A/Mallard/Finland/13384/2010_H9N2               | GenBank | KF183632         |                  |
| A/Mallard/Finland/13977/2010_H9N2               | GenBank | KF183634         |                  |
| A/Mallard/France/090360/2009_H9N2               | GenBank | CY080415         | CY080417         |
| A/Mallard/Iran/T366/2007_H9N2                   | GenBank | FN600117         |                  |
| A/Mallard/Ireland/PV46B/1993_H9N3               | GenBank | AB303077         |                  |
| A/Mallard/Norway/10_1537/2009_H9N2              | GenBank | HE802723         |                  |
| A/Mallard/Portugal/83660/2009_H9N2              | GenBank | CY116614         | CY184159         |
| A/Mallard/Portugal/83695/2009_H9N2              | GenBank | CY184165         | CY184167         |
| A/Mallard/Portugal/99002/2009_H9N2              | GenBank | CY116616         |                  |
| A/Mallard/Portugal/99005/2009_H9N2              | GenBank | CY116618         |                  |
| A/Mallard/Portugal/99006/2009_H9N2              | GenBank | CY116620         |                  |
| A/Mallard/PT/27972-B139/2007_H9N2               | GenBank | JF745931         |                  |
| A/Mallard/Sweden/4932/2004_H9N2                 | GenBank | CY184117         | CY184119         |
| A/Mallard/Sweden/67860/2007_H9N2                | GenBank | CY184149         |                  |
| A/Mallard/Sweden/7146/2004_H9N2                 | GenBank | CY184125         | CY184127         |
| A/Mallard/Sweden/99668/2009_H9N2                | GenBank | CY184173         |                  |
| A/Mallard/Sweden/99785/2009_H9N2                | GenBank | CY184181         |                  |
| A/Mallard/Switzerland/WV1070800/2007_H9N2       | GenBank | GU194480         |                  |
| A/Mallard/Switzerland/WV1070805/2007_H9N2       | GenBank | GU194481         |                  |
| A/Mallard/Switzerland/WV1080875/2008_H9N2       | GenBank | GU194482         |                  |
| A/Mallard/Switzerland/WV3080008/2007_H9N2       | GenBank | GU194486         |                  |
| A/Mallard/Switzerland/WV3080036/2008_H9N2       | GenBank | GU194487         |                  |
| A/Mandarin_duck/Korea/K12-256/2012_H9N2         | GenBank | KR234076         |                  |
| A/Ostrich/South_Africa/AI1586/2008_H9N2         | GenBank | GQ404721         |                  |
| A/Pelican/Zambia/13/2009_H9N1                   | GenBank | AB569567         |                  |
| A/Pink-footed_goose/Netherlands/1/2006_H9N2     | GenBank | CY041266         | CY041268         |
| A/Ruddy_turnstone/Delaware_Bay/261/1999_H9N7    | GenBank | CY102532         |                  |
| A/Ruddy_turnstone/Delaware/AI03-114/2003_H9N2   | GenBank | CY144483         |                  |
| A/Ruddy_turnstone/Delaware/AI03-123/2003_mixed  | GenBank | CY144473         |                  |
| A/Ruddy_turnstone/Delaware/AI03-162/2003_mixed  | GenBank | CY144464         | CY144466         |
| A/Ruddy_turnstone/Delaware/AI03-163/2003_H9N8   | GenBank | CY144547         |                  |
| A/Ruddy_turnstone/Delaware/AI03-165/2003_H9N5   | GenBank | CY144456         | CY144458         |

| Viral Name                                       | Source  | Accession number | Accession number |
|--------------------------------------------------|---------|------------------|------------------|
|                                                  |         | HA segment       | NA segment       |
| A/Ruddy_turnstone/Delaware/AI03-180/2003_H9N9    | GenBank | CY144563         |                  |
| A/Ruddy_turnstone/Delaware/AI03-193/2003_H9N5    | GenBank | CY144373         | CY144375         |
| A/Ruddy_turnstone/Delaware/AI03-200/2003_H9N8    | GenBank | CY144555         |                  |
| A/Ruddy_turnstone/Delaware/AI03-224/2003_H9N9    | GenBank | CY144523         |                  |
| A/Shorebird/DE/261/2003_H9N5                     | GenBank | CY005992         |                  |
| A/Shorebird/Delaware_Bay/127/2003_H9N2           | GenBank | CY102728         |                  |
| A/Shorebird/Delaware_Bay/163/2003_H9N2           | GenBank | KF188256         |                  |
| A/Shorebird/Delaware_Bay/246/2003_H9N5           | GenBank | CY102736         | CY102738         |
| A/Shorebird/Delaware_Bay/276/1999_H9N2           | GenBank | KF188373         |                  |
| A/Shorebird/Delaware_Bay/283/2003_H9N1           | GenBank | CY102744         |                  |
| A/Shorebird/Delaware_Bay/286/2003_H9N2           | GenBank | KF188278         |                  |
| A/Shorebird/Delaware_Bay/293/2003_H9N2           | GenBank | KF188333         |                  |
| A/Shorebird/Delaware_Bay/73/2003_H9N2            | GenBank | CY101323         |                  |
| A/Teal/Finland/10529/2010_H9N2                   | GenBank | KF183628         |                  |
| A/Teal/Primorie/3628/02_H9N2                     | GenBank | DQ787797         |                  |
| A/Teal/Primorie/3631/02_H9N2                     | GenBank | DQ787802         |                  |
| A/Teal/Switzerland/WV1070694/2007_H9N2           | GenBank | GU194479         |                  |
| A/Turkey/Germany/EK224/1995_H9N2                 | GenBank | JX273569         |                  |
| A/Turkey/Netherlands/11015452/2011_H9N2          | GenBank | JX273570         | KY676336         |
| A/Duck/Tsukuba/574/2006_H10N1                    | GISAID  | EPI356629        |                  |
| A/Shoveler/Egypt/00006-NAMRU3/2007_H10N1         | GISAID  | EPI372442        |                  |
| A/Teal/Egypt/12908-NAMRU3/2005_H10N1             | GISAID  | EPI372481        | EPI372480        |
| A/Wild_bird/Korea/A323/2009_H10N1                | GISAID  | EPI387876        |                  |
| A/Duck/Hokkaido/W87/2007_H10N2                   | GISAID  | EPI161527        |                  |
| A/Duck/Hunan/S11205/2012_H10N3                   | GISAID  | EPI461563        |                  |
| A/Duck/Thailand/LM-CU4747/2009_H10N3             | GISAID  | EPI314742        |                  |
| A/Duck/Thailand/LM-CU4753/2009_H10N3             | GISAID  | EPI314746        |                  |
| A/Muscovy_duck/Thailand/CU-LM4754/2009_H10N3     | GISAID  | EPI256770        |                  |
| A/Duck/Italy/268302/2004_H10N4                   | GISAID  | EPI178493        | EPI178495        |
| A/Pied_avocet/Ukraine/05848-NAMRU3/2006_H10N4    | GISAID  | EPI372496        | EPI372495        |
| A/Shoveler/Egypt/01574-NAMRU3/2007_H10N4         | GISAID  | EPI372458        | EPI372457        |
| A/Long-tailed_duck/Wisconsin/10053919/2010_H10N6 | GISAID  | EPI419336        |                  |
| A/Mallard/Denmark/16109-4/2011-11-14_H10N6       | GISAID  | EPI541472        |                  |
| A/Anas_platyrhynchos/Camargue/091863/09_H10N7    | GISAID  | EPI332944        | EPI332955        |
| A/Avian/Israel/201/2001_H10N7                    | GenBank | JN564724         | JN575025         |
| A/Avian/Israel/218/2000_H10N7                    | GenBank | JN564725         | JN575026         |
| A/Avian/Israel/232/2001_H10N7                    | GISAID  | EPI456969        |                  |
| A/Avian/Israel/297/2001_H10N7                    | GenBank | JN564728         | JN575029         |
| A/Avian/Israel/445/2001_H10N7                    | GenBank | JN564730         | JN575031         |
| A/Avian/Israel/457/2001_H10N7                    | GenBank | JN564731         | JN575032         |
| A/Duck/Italy/62330/2006_H10N7                    | GISAID  | EPI178528        |                  |
| A/Duck/Italy/73383/2006_H10N7                    | GISAID  | EPI174777        |                  |
| A/Duck/Shimane/45/1997_H10N7                     | GenBank | AB296078         | AB296079         |
| A/Harbor_seal/Denmark/14-5061-1lu/2014-07_H10N7  | GISAID  | EPI541474        |                  |
| A/Mallard/Egypt/EMC-4/2012_H10N7                 | GISAID  | EPI552755        |                  |
| A/Mallard/Netherlands/1/2012_H10N7               | GISAID  | EPI552756        |                  |
| A/Mallard/Netherlands/1/2014_H10N7               | GISAID  | EPI552751        |                  |
| A/Mallard/Netherlands/47/2010_H10N7              | GenBank | KR862524         | KR862722         |
| A/Mallard/Netherlands/50/2010_H10N7              | GenBank | KR862527         | KR862727         |
| A/Northern_pintail/Egypt/EMC-1/2012_H10N7        | GISAID  | EPI552754        |                  |
| A/Seal/Sweden/SVA0546/2014_H10N7                 | GISAID  | EPI545212        |                  |
| A/Shoveler/Egypt/00600-NAMRU3/2004_H10N7         | GISAID  | EPI372291        |                  |
| A/Shoveler/Egypt/01198-NAMRU3/2007_H10N7         | GISAID  | EPI372402        |                  |
| A/Shoveler/Egypt/09781-NAMRU3/2004_H10N7         | GISAID  | EPI372339        | EPI372338        |
| A/Teal/Egypt/01207-NAMRU3/2007_H10N7             | GISAID  | EPI372426        | EPI372425        |
| A/Seal/Sweden/SVA0824/2014_H10N7_H10N7           | GISAID  | EPI547696        |                  |
| A/Chicken/77/Jiangxi/2014_H10N8                  | GISAID  | EPI537463        |                  |
| A/Chicken/Jiangxi/102/2013_H10N8                 | GISAID  | EPI530542        |                  |
| A/Environment/Dongting_Lake/Hunan/3-9/2007_H10N8 | GISAID  | EPI221966        |                  |
| A/Environment/Jiangxi/03366/2013_H10N8           | GISAID  | EPI530386        |                  |
| A/Environment/Jiangxi/03367/2013_H10N8           | GISAID  | EPI530394        |                  |
| A/Environment/Jiangxi/03413/2013_H10N8           | GISAID  | EPI530402        |                  |
| A/Environment/Jiangxi/03489/2013_H10N8           | GISAID  | EPI530410        |                  |
| A/Environment/Jiangxi/10615/2014_H10N8           | GISAID  | EPI530418        |                  |
| A/Environment/Jiangxi/10721/2014_H10N8           | GISAID  | EPI530426        |                  |
| A/Environment/Jiangxi/10738/2014_H10N8           | GISAID  | EPI530434        |                  |
| A/Jiangxi-Donghu/346/2013_H10N8                  | GISAID  | EPI497477        |                  |
| A/Jiangxi/09037/2014_H10N8                       | GISAID  | EPI530450        |                  |
| A/Mallard/Sweden/7/2003_H10N8                    | GISAID  | EPI251793        |                  |
| A/Northern_shoveler/Hong_Kong/MPC657/2006_H10N9  | GISAID  | EPI469806        |                  |

| Viral Name                                       | Source  | Accession number | Accession number |
|--------------------------------------------------|---------|------------------|------------------|
|                                                  |         | HA segment       | NA segment       |
| A/Northern_shoveler/Hong_Kong/MPE2531/2008_H10N9 | GISAID  | EPI469805        |                  |
| A/Northern_shoveler/Hong_Kong/MPE2984/2008_H10N9 | GISAID  | EPI469808        |                  |
| A/Shoveler/Egypt/00004-NAMRU3/2007_H10N9         | GISAID  | EPI372434        |                  |
| A/Ruddy_turnstone/Netherlands/8/2008_H10N4       | GenBank | KR862508         | KR862683         |
| A/Mallard/Netherlands/1/2007_H10N7               | GenBank | KR862510         |                  |
| A/Eurasian_wigeon/Netherlands/3/2007_H10N1       | GenBank | KR862511         |                  |
| A/Ruddy_turnstone/Netherlands/2/2009_H10N4       | GenBank | KR862515         | KR862690         |
| A/Mallard/Lithuania/EMC-1/2011_H10N4             | GenBank | KR862380         | KR862396         |
| A/Mallard/Lithuania/EMC-1/2010_H10N4             | GenBank | KR862381         | KR862397         |
| A/Mallard/Netherlands/16/2006_H10N7              | GenBank | KR862507         |                  |
| A/Mallard/Netherlands/2/2008_H10N7               | GenBank | KR862517         | KR862710         |
| A/Mallard/Netherlands/67/2008_H10N7              | GenBank | KR862518         | KR862711         |
| A/Mallard/Netherlands/1/2009_H10N7               | GenBank | KR862522         | KR862715         |
| A/Mallard/Netherlands/53/2008_H10N7              | GenBank | KR862523         | KR862716         |
| A/Mallard/Netherlands/30/2009_H10                | GenBank | KR862525         |                  |
| A/Mallard/Egypt/EMC-1/2012_H10N7                 | GenBank | KR862382         |                  |
| A/Chicken/Netherlands/10008427/2010_H10N7        | GenBank | KY676331         | KY676345         |
| A/Turkey/Netherlands/09006938/2009_H10N7         | GenBank | KY676332         | KY676344         |
| A/Mallard/Netherlands/06013952/2006_H10N7        | GenBank | KY676349         |                  |
| A/Mallard/Netherlands/06014516/2006_H10N8        | GenBank | KY676350         |                  |
| A/Avian/Israel/543/2008_H10N7                    | GenBank | JN564732         | JN575033         |
| A/Avian/Israel/824/2005_H10N2                    | GenBank | JN564733         |                  |
| A/Chicken/Jiangsu/RD5/2013_H10N9                 | GenBank | KF006414         |                  |
| A/Common_teal/Hong_Kong/MPK630/2009_H10N9        | GenBank | KF259197         |                  |
| A/Duck/Guangdong/E1/2012_H10N8                   | GenBank | JQ924786         |                  |
| A/Duck/Hunan/S1496/2011_H10N8                    | GenBank | KP862019         |                  |
| A/Duck/Hunan/S3137/2009_H10N8                    | GenBank | KP862027         |                  |
| A/Duck/Hunan/S4280/2009_H10N8                    | GenBank | KP862035         |                  |
| A/Duck/Huzhou/4233/2013_mixed                    | GenBank | KP413924         |                  |
| A/Duck/Jiangxi/13875/2005_H10N3                  | GenBank | KP287830         |                  |
| A/Duck/Jiangxi/13946/2005_H10N3                  | GenBank | KP287838         |                  |
| A/Duck/Jiangxi/15846/2013_H10N3                  | GenBank | KP285477         |                  |
| A/Duck/Jiangxi/2039/2005_H10N8                   | GenBank | KP287926         |                  |
| A/Duck/Jiangxi/24570/2009_mixed                  | GenBank | KP287794         |                  |
| A/Duck/Jiangxi/26141/2009_H10N7                  | GenBank | KP287966         | KP287968         |
| A/Duck/Jiangxi/26182/2009_H10N7                  | GenBank | KP287974         | KP287976         |
| A/Duck/Jiangxi/26281/2009_H10N7                  | GenBank | KP287982         |                  |
| A/Duck/Jiangxi/26331/2009_H10N7                  | GenBank | KP287990         |                  |
| A/Duck/Jiangxi/27314/2012_H10N7                  | GenBank | KP287665         | KP287667         |
| A/Duck/Jiangxi/302/2006_H10N3                    | GenBank | KP287846         |                  |
| A/Duck/Jiangxi/6450/2013_H10N8                   | GenBank | KP285589         |                  |
| A/Duck/Jiangxi/6544/2013_H10N8                   | GenBank | KP285661         |                  |
| A/Duck/Jiangxi/6556/2013_H10N8                   | GenBank | KP285677         |                  |
| A/Duck/Jiangxi/6613/2013_mixed                   | GenBank | KP287044         |                  |
| A/Duck/Jiangxi/6648/2013_H10N8                   | GenBank | KP285733         |                  |
| A/Duck/Jiangxi/860/2006_H10N3                    | GenBank | KP287886         |                  |
| A/Duck/Mongolia/149/03_H10N5                     | GenBank | AB450456         | AB270599         |
| A/Duck/Zhejiang/6D20/2013_H10N2                  | GenBank | KP063197         |                  |
| A/Eurasian_wigeon/Netherlands/4/2007_H10N1       | GenBank | CY077048         |                  |
| A/Goose/Guizhou/829/2012_H10N7                   | GenBank | KF259194         |                  |
| A/Harbour_seal/Germany/1/2014_H10N7              | GenBank | KP137835         | KP137832         |
| A/Herring_gull/Netherlands/4/2006_H10N4          | GenBank | CY077032         | CY077034         |
| A/Mallard/Bavaria/3/2006_H10N7                   | GenBank | FJ183474         | FJ183475         |
| A/Mallard/Korea/1203/2010_H10N8                  | GenBank | JN817572         |                  |
| A/Mallard/Korea/1242/2010_H10N6                  | GenBank | JN817576         |                  |
| A/Mallard/Netherlands/02/2000_H10N7              | GenBank | CY076945         | CY076947         |
| A/Mallard/Portugal/79940/2009_H10N7              | GenBank | CY116612         |                  |
| A/Mallard/Republic_of_Georgia/1/2010_H10N1       | GenBank | KC190171         | KC190180         |
| A/Mallard/Republic_of_Georgia/12/2011_H10N4      | GenBank | CY185505         | CY185507         |
| A/Mallard/Republic_of_Georgia/14/2011_H10N7      | GenBank | CY185689         | CY185691         |
| A/Mallard/Republic_of_Georgia/15/2011_H10N7      | GenBank | CY185385         | CY185387         |
| A/Mallard/Sweden/102087/2009_H10N1               | GenBank | CY183839         | CY183841         |
| A/Mallard/Sweden/104746/2009_H10N1               | GenBank | CY183855         |                  |
| A/Mallard/Sweden/105186/2009_H10N1               | GenBank | CY183863         |                  |
| A/Mallard/Sweden/105323/2009_H10N1               | GenBank | CY183887         | CY183889         |
| A/Mallard/Sweden/105402/2009_H10N1               | GenBank | CY183911         |                  |
| A/Mallard/Sweden/105404/2009_H10N1               | GenBank | CY183919         |                  |
| A/Mallard/Sweden/105465/2009_H10N1               | GenBank | CY183927         | CY183929         |
| A/Mallard/Sweden/105501/2009_H10N1               | GenBank | CY183951         | CY183953         |
| A/Mallard/Sweden/105522/2009_H10N1               | GenBank | JX566079         | JX566263         |

| Viral Name                                          | Source  | Accession number | Accession number |
|-----------------------------------------------------|---------|------------------|------------------|
|                                                     |         | HA segment       | NA segment       |
| A/Mallard/Sweden/105527/2009_H10N1                  | GenBank | CY183959         | CY183961         |
| A/Mallard/Sweden/105536/2009_H10N1                  | GenBank | CY183967         |                  |
| A/Mallard/Sweden/133546/2011_H10N4                  | GenBank | CY183991         | CY183993         |
| A/Mallard/Sweden/1417/2002_H10N7                    | GenBank | CY183637         | CY183639         |
| A/Mallard/Sweden/223/2002_H10N2                     | GenBank | CY183580         |                  |
| A/Mallard/Sweden/3151/2003_H10N7                    | GenBank | CY183645         | CY183647         |
| A/Mallard/Sweden/4258/2004_H10N4                    | GenBank | CY183653         | CY183655         |
| A/Mallard/Sweden/4401/2004_H10N4                    | GenBank | CY183661         | CY183663         |
| A/Mallard/Sweden/4411/2004_H10N4                    | GenBank | CY183669         |                  |
| A/Mallard/Sweden/51/2002_H10N2                      | GenBank | HM136575         |                  |
| A/Mallard/Sweden/51548/2006_H10N4                   | GenBank | CY183718         | CY183720         |
| A/Mallard/Sweden/51619/2006_H10N4                   | GenBank | CY183734         | CY183736         |
| A/Mallard/Sweden/51933/2006_H10N9                   | GenBank | CY183758         |                  |
| A/Mallard/Sweden/52903/2006_H10N9                   | GenBank | CY183783         |                  |
| A/Mallard/Sweden/5812/2005_H10N9                    | GenBank | CY183677         |                  |
| A/Mallard/Sweden/5824/2005_H10N7                    | GenBank | CY183685         |                  |
| A/Mallard/Sweden/5932/2005_H10N7                    | GenBank | CY183401         | CY183403         |
| A/Mallard/Sweden/59463/2007_H10N7                   | GenBank | CY183791         | CY183793         |
| A/Mallard/Sweden/60065/2007_mixed                   | GenBank | CY184665         |                  |
| A/Mallard/Sweden/6039/2005_H10N4                    | GenBank | CY184640         | CY184642         |
| A/Mallard/Sweden/64476/2007_H10N4                   | GenBank | CY183799         | CY183801         |
| A/Mallard/Sweden/69773/2007_H10N5                   | GenBank | CY183807         | CY183809         |
| A/Mallard/Sweden/69777/2007_H10N6                   | GenBank | CY183815         |                  |
| A/Mallard/Sweden/69792/2007_H10N5                   | GenBank | CY183823         |                  |
| A/Mallard/Sweden/737/2002_H10N2                     | GenBank | CY183588         | CY183590         |
| A/Mallard/Sweden/766/2002_mixed                     | GenBank | CY183596         |                  |
| A/Mallard/Sweden/8004/2005_H10N4                    | GenBank | CY184657         | CY184659         |
| A/Mallard/Sweden/8023/2005_H10N4                    | GenBank | CY183710         | CY183712         |
| A/Mallard/Sweden/93475/2009_H10N6                   | GenBank | CY183831         |                  |
| A/Mallard/Sweden/948/2002_H10N9                     | GenBank | CY183629         |                  |
| A/Mallard/Switzerland/WV1090023/2009_H10            | GenBank | HM179251         |                  |
| A/Migratory_duck/Jiangxi/10857/2005_H10N2           | GenBank | KP287998         | KP288000         |
| A/Migratory_duck/Jiangxi/10974/2005_H10N6           | GenBank | KP287822         |                  |
| A/Migratory_duck/Jiangxi/21248/2009_H10N8           | GenBank | KP287958         |                  |
| A/Migratory_duck/Jiangxi/30246/2013_H10N5           | GenBank | KP284877         | KP284879         |
| A/Migratory_duck/Jiangxi/33038/2013_H10N7           | GenBank | KP285893         | KP285895         |
| A/Migratory_duck/Jiangxi/33158/2013_H10N7           | GenBank | KP285901         |                  |
| A/Migratory_duck/Jiangxi/33238/2013_H10N7           | GenBank | KP285917         |                  |
| A/Migratory_duck/Jiangxi/593/2005_H10N8             | GenBank | KP287934         |                  |
| A/Migratory_duck/Jiangxi/6847/2003_H10N5            | GenBank | KP288014         | KP288016         |
| A/Migratory_duck/Jiangxi/9334/2005_H10N6            | GenBank | KP287814         |                  |
| A/Migratory_duck/Jiangxi/9492/2005_H10N6            | GenBank | KP288006         |                  |
| A/Ostrich/SouthAfrica/2001_H10N1                    | GenBank | GQ247860         |                  |
| A/Pekin_duck/South_Africa/AI1642/2009_H10N7         | GenBank | GQ404728         |                  |
| A/Ruddy_shelduck/Mongolia/1602/2010_H10N8           | GenBank | KF501079         |                  |
| A/Ruddy_shelduck/Mongolia/974/2010_H10N7            | GenBank | KF501093         | KF667728         |
| A/Surf_scooter/Mongolia/878V/2009_H10N8             | GenBank | KF501083         |                  |
| A/Velvet_scooter/Mongolia/879V/2009_H10N8           | GenBank | KF501096         |                  |
| A/Wild_bird/Korea/A01/2011_H10N4                    | GenBank | JN817570         | JN817551         |
| A/Wild_bird/Korea/A02/2011_H10N4                    | GenBank | JN817571         | JN817552         |
| A/Wild_bird/Korea/A12/2010_H10N1                    | GenBank | JN817574         |                  |
| A/Wild_bird/Korea/A13/2010_H10N1                    | GenBank | JN817575         |                  |
| A/Wild_bird/Korea/L110-2/2008_H10N4                 | GenBank | JN817580         | JN817549         |
| A/Mallard/Netherlands/24/2006_H1N1                  | GenBank |                  | KR862544         |
| A/Mallard/Netherlands/25/2006_H1N1                  | GenBank |                  | KR862545         |
| A/Mallard/Netherlands/45/2006_H1N1                  | GenBank |                  | KR862547         |
| A/Mallard/Netherlands/46/2006_H1N1                  | GenBank |                  | KR862548         |
| A/Lesser_black-backed_gull/Netherlands/1/2007_H11N1 | GenBank |                  | KR862553         |
| A/Mallard/Netherlands/24/2009_H6N1                  | GenBank |                  | KR862555         |
| A/Mallard/Netherlands/12/2005_H1N1                  | GenBank |                  | KR862535         |
| A/Mallard/Netherlands/14/2005_H1N1                  | GenBank |                  | KR862536         |
| A/Mallard/Netherlands/15/2005_H1N1                  | GenBank |                  | KR862537         |
| A/Brent_goose/Netherlands/1/2006_H1N1               | GenBank |                  | KR862541         |
| A/Mallard/Netherlands/83/2008_H7N1                  | GenBank |                  | KR862561         |
| A/Mallard/Netherlands/32/2008_H6N1                  | GenBank |                  | KR862562         |
| A/Mallard/Netherlands/54/2008_H10N1                 | GenBank |                  | KR862564         |
| A/Mallard/Netherlands/46/2008_H6N1                  | GenBank |                  | KR862570         |
| A/Mallard/Netherlands/77/2008_H7N1                  | GenBank |                  | KR862571         |
| A/Common_teal/Netherlands/1/2008_H6N1               | GenBank |                  | KR862574         |
| A/Mallard/Netherlands/28/2009_H1N1                  | GenBank |                  | KR862580         |

| Viral Name                                    | Source  | Accession number | Accession number |
|-----------------------------------------------|---------|------------------|------------------|
|                                               |         | HA segment       | NA segment       |
| A/Mallard/Netherlands/39/2011_N1              | GenBank |                  | KR862583         |
| A/Mallard/Netherlands/40/2011_H7N1            | GenBank |                  | KR862584         |
| A/Mallard/Netherlands/10/2012_H6N1            | GenBank |                  | KR862587         |
| A/Mallard/Netherlands/24/2012_N1              | GenBank |                  | KR862588         |
| A/Mallard/Netherlands/8/2012_H1N1             | GenBank |                  | KR862589         |
| A/Mallard/Netherlands/78/2008_H7N1            | GenBank |                  | KR862592         |
| A/Mallard/Netherlands/12/2012_H6N1            | GenBank |                  | KR862594         |
| A/Mallard/Netherlands/14/2012_N1              | GenBank |                  | KR862599         |
| A/White-fronted_goose/Germany-NI/R482/09_H1N1 | GISAID  | EPI248525        | EPI248524        |
| A/White-fronted_goose/Netherlands/1/1999_H6N1 | GenBank |                  | CY060433         |
| A/Domestic_goose/Germany-MV/R3298/2009_H6N1   | GISAID  |                  | EPI339177        |
| A/Mallard/Italy/4518/2007_H10N1               | GISAID  |                  | EPI511812        |
| A/Duck/Hokkaido/Vac-1/04_H5N1                 | GenBank |                  | AB259714         |
| A/Chicken/Hubei/Wf/2002_H5N1                  | GenBank |                  | DQ997088         |
| A/Duck/Guangxi/xa/2001_H5N1                   | GenBank |                  | DQ997514         |
| A/Duck/Zhejiang/bj/2002_H5N1                  | GenBank |                  | DQ997411         |
| A/Chicken/Jilin/hk/2004_H5N1                  | GenBank |                  | DQ997326         |
| A/Teal/Hong_Kong/2978/03_H5N1                 | GenBank |                  | EF467813         |
| A/Goose/Guangdong/3/97_H5N1                   | GenBank |                  | AF364335         |
| A/Duck/France/05066b/2005_H5N1                | GenBank |                  | AJ972921         |
| A/Duck/Viet_Nam/Ncvd1/2002_H5N1               | GenBank |                  | EF541465         |
| A/Duck/Hokkaido/Vac-3/2007_H5N1               | GenBank |                  | AB355931         |
| A/Duck/Eastern_China/01/2002_H3N1             | GenBank |                  | EU429718         |
| A/Duck/Eastern_China/341/2003_H3N1            | GenBank |                  | EU429719         |
| A/Duck/Eastern_China/213/2003_H3N1            | GenBank |                  | EU429723         |
| A/Duck/Eastern_China/233/2003_H3N1            | GenBank |                  | EU429733         |
| A/Duck/Eastern_China/262/2003_H3N1            | GenBank |                  | EU429734         |
| A/Duck/Eastern_China/103/2003_H1N1            | GenBank |                  | EU429749         |
| A/Duck/Eastern_China/152/2003_H1N1            | GenBank |                  | EU429751         |
| A/Duck/Eastern_China/243/2003_H3N1            | GenBank |                  | EU429752         |
| A/Duck/Eastern_China/252/2003_H3N1            | GenBank |                  | EU429753         |
| A/Duck/Eastern_China/253/2003_H3N1            | GenBank |                  | EU429754         |
| A/Duck/Eastern_China/267/2003_H3N1            | GenBank |                  | EU429755         |
| A/Duck/Eastern_China/231/2003_H3N1            | GenBank |                  | EU429766         |
| A/Chicken/Shantou/904/2001_H5N1               | GenBank |                  | CY029008         |
| A/Quail/Shantou/3846/2002_H5N1                | GenBank |                  | CY029169         |
| A/Chicken/Hong_Kong/715.5/01_H5N1             | GenBank |                  | AF509100         |
| A/Duck/Hong_Kong/3461/99_H6N1                 | GenBank |                  | AJ410564         |
| A/Goose/Hong_Kong/385.3/2000_H5N1             | GenBank |                  | AF398421         |
| A/Goose/Hong_Kong/385.5/2000_H5N1             | GenBank |                  | AF398422         |
| A/Duck/Hokkaido/143/2003_H7N1                 | GenBank |                  | AB451873         |
| A/Goose/Hong_Kong/Ww26/2000_H5N1              | GenBank |                  | AY059483         |
| A/Goose/Hong_Kong/Ww28/2000_H5N1              | GenBank |                  | AY059484         |
| A/Duck/Hong_Kong/Ww381/2000_H5N1              | GenBank |                  | AY059485         |
| A/Duck/Hong_Kong/Ww382/2000_H5N1              | GenBank |                  | AY059486         |
| A/Duck/Hong_Kong/Ww461/2000_H5N1              | GenBank |                  | AY059487         |
| A/Goose/Hong_Kong/Ww491/2000_H5N1             | GenBank |                  | AY059489         |
| A/Duck/Hong_Kong/2986.1/2000_H5N1             | GenBank |                  | AY059490         |
| A/Goose/Hong_Kong/3014.8/2000_H5N1            | GenBank |                  | AY059491         |
| A/Mallard/France/2525/2001_H7N1               | GenBank |                  | AM157356         |
| A/Mallard/France/2526/2001_H7N1               | GenBank |                  | AM157357         |
| A/Mallard/France/691/2002_H1N1                | GenBank |                  | AM157358         |
| A/Swan/Mangystau/3/2006_H5N1                  | GenBank |                  | FJ436943         |
| A/Chicken/Hong_Kong/317.5/2001b_H5N1          | GenBank |                  | AY075028         |
| A/Goose/Hong_Kong/3014.5/2000b_H5N1           | GenBank |                  | AY075031         |
| A/Duck/Hong_Kong/380.5/2001_H5N1              | GenBank |                  | AY075034         |
| A/Mute_swan/Aktau/1460/2006_H5N1              | GenBank |                  | FJ434374         |
| A/Duck/Hokkaido/83/2004_H1N1                  | GenBank |                  | AB470661         |
| A/Duck/Hokkaido/W73/2007_H1N1                 | GenBank |                  | AB470663         |
| A/Duck/Mongolia/116/2002_H1N1                 | GenBank |                  | AB470667         |
| A/Duck/Mongolia/253/2003_H1N1                 | GenBank |                  | AB470668         |
| A/Duck/Mongolia/540/2001_H1N1                 | GenBank |                  | AB470669         |
| A/Duck/Mongolia/610/2002_H1N1                 | GenBank |                  | AB470670         |
| A/Duck/Mongolia/867/2002_H7N1                 | GenBank |                  | AB473545         |
| A/Teal/Viet_Nam/MBP5/2006_H5N1                | GenBank |                  | FJ811998         |
| A/Duck/Tsukuba/67/2005_H1N1                   | GenBank |                  | AB472015         |
| A/Duck/Chiba/884/2004_H3N1                    | GenBank |                  | AB472013         |
| A/Anas_plathyrhynchos/Spain/1266/2007_H1N1    | GenBank |                  | FN386469         |
| A/Anas_crecca/Spain/1402/2007_H1N1            | GenBank |                  | FN386473         |
| A/Duck/Korea/334-15/2008_H6N1                 | GenBank |                  | GQ414900         |

| Viral Name                                           | Source  | Accession number | Accession number |
|------------------------------------------------------|---------|------------------|------------------|
|                                                      |         | HA segment       | NA segment       |
| A/Duck/Korea/112-25/2008_H6N1                        | GenBank |                  | GQ414901         |
| A/Spot-billed_duck/Korea/625/2008_H6N1               | GenBank |                  | GQ414902         |
| A/Spot-billed_duck/Korea/545/2008_H6N1               | GenBank |                  | GQ414903         |
| A/Spot-billed_duck/Korea/527/2008_H6N1               | GenBank |                  | GQ414905         |
| A/Spot-billed_duck/Korea/534/2008_H6N1               | GenBank |                  | GQ414906         |
| A/Spot-billed_duck/Korea/546/2008_H6N1               | GenBank |                  | GQ414907         |
| A/Spot-billed_duck/Korea/536/2008_H6N1               | GenBank |                  | GQ414908         |
| A/Spot-billed_duck/Korea/540/2008_H6N1               | GenBank |                  | GQ414910         |
| A/Mallard/Korea/L08-8/2008_H6N1                      | GenBank |                  | GQ414904         |
| A/Mallard/Bavaria/47/2006_N1                         | GenBank |                  | GU046750         |
| A/Mallard/Bavaria/48/2006_N1                         | GenBank |                  | GU046751         |
| A/Duck/Bavaria/49/2006_H11N1                         | GenBank |                  | GU046753         |
| A/Waterfowl/Hong_Kong/378.5/2001_H5N1                | GenBank |                  | GU186694         |
| A/Goose/Hong_Kong/437-6/1999_H5N1                    | GenBank |                  | GU052021         |
| A/Goose/Hong_Kong/437-8/1999_H5N1                    | GenBank |                  | GU052029         |
| A/Goose/Hong_Kong/485.3/2000_H5N1                    | GenBank |                  | GU052044         |
| A/Goose/Hong_Kong/1032.6/2000_H5N1                   | GenBank |                  | GU052052         |
| A/Goose/Hong_Kong/3014.5/2000a_H5N1                  | GenBank |                  | GU052075         |
| A/Chicken/Hong_Kong/317.5/2001a_H5N1                 | GenBank |                  | GU052083         |
| A/Hong_Kong/378.1/2001_H5N1                          | GenBank |                  | GU052091         |
| A/Goose/Hong_Kong/668.1/2001_H5N1                    | GenBank |                  | GU052467         |
| A/Chicken/Hong_Kong/NT873.3/01-MB_H5N1               | GenBank |                  | AY221539         |
| A/Pheasant/Hong_Kong/FY155/01-MB_H5N1                | GenBank |                  | AY221543         |
| A/Pheasant/Hong_Kong/FY155/01_H5N1                   | GenBank |                  | AY221544         |
| A/Chicken/Hong_Kong/FY150/01_H5N1                    | GenBank |                  | AF509095         |
| A/Mallard/Norway/10_1671/2007_H1N1                   | GenBank |                  | FN773074         |
| A/Mallard/Jiangxi/6845/2003_H6N1                     | GenBank |                  | HM144559         |
| A/Aquatic_bird/India/NIV-17095/2007_H11N1            | GenBank |                  | CY055177         |
| A/Mallard/PT/23059/2007_H1N1                         | GenBank |                  | HM849011         |
| A/Chicken/Pakistan/NARC-16945/2010_H3N1              | GenBank |                  | HQ165998         |
| A/Mallard/Bavaria/185-26/2008_H1N1                   | GenBank |                  | HQ259234         |
| A/Mallard/Netherlands/28/2006_H3N1                   | GenBank |                  | CY076907         |
| A/Duck/Korea/GJ74/2007_H3N1                          | GenBank |                  | JN087234         |
| A/Duck/Zhejiang/2245/2011_H5N1                       | GenBank |                  | JN646732         |
| A/Lesser_whistling-duck/Thailand/CU-W3947/2010_H12N1 | GenBank |                  | JN982529         |
| A/Lesser_whistling-duck/Thailand/CU-W3946/2010_H12N1 | GenBank |                  | JN982521         |
| A/Lesser_whistling-duck/Thailand/CU-W3941/2010_H12N1 | GenBank |                  | JN982513         |
| A/Watercock/Thailand/CU-W3699/2009_H12N1             | GenBank |                  | JN982505         |
| A/Chicken/England/1415-51184/2010_H9N1               | GenBank |                  | JQ609665         |
| A/Mallard/Netherlands/10-Nmkt/1999_N1                | GenBank |                  | KC209509         |
| A/Duck/Hokkaido/W26/2012_H12N1                       | GenBank |                  | AB780370         |
| A/Duck/Fujian/17/2001_H5N1                           | GenBank |                  | AY585401         |
| A/Duck/Guangdong/01/2001_H5N1                        | GenBank |                  | AY585403         |
| A/Duck/Guangdong/07/2000_H5N1                        | GenBank |                  | AY585404         |
| A/Duck/Guangdong/40/2000_H5N1                        | GenBank |                  | AY585407         |
| A/Duck/Guangxi/35/2001_H5N1                          | GenBank |                  | AY585410         |
| A/Duck/Shanghai/13/2001_H5N1                         | GenBank |                  | AY585414         |
| A/Duck/Zhejiang/52/2000_H5N1                         | GenBank |                  | AY585419         |
| A/Turkey/Italy/604/2000_H7N1                         | GenBank |                  | KF493262         |
| A/European_teal/Novosibirsk/203/2011_H5N1            | GenBank |                  | KF462363         |
| A/European_teal/Novosibirsk/239/2011_H5N1            | GenBank |                  | KF462365         |
| A/European_teal/Novosibirsk/261/2011_H5N1            | GenBank |                  | KF462367         |
| A/Swine/Fujian/F1/2001_H5N1                          | GenBank |                  | AY747618         |
| A/Common_goldeneye/Mongolia/1271/2010_H7N1           | GenBank |                  | KF667689         |
| A/Mallard/Mongolia/1551/2010_H3N1                    | GenBank |                  | KF667697         |
| A/Ruddy_shelduck/Mongolia/921C2/2009_H7N1            | GenBank |                  | KF667727         |
| A/Swine/Fujian/1/2003_H5N1                           | GenBank |                  | AY747610         |
| A/Goose/Guangdong/1/96_H5N1                          | GenBank |                  | AF144304         |
| A/Mallard/Sweden/52405/2006_N1                       | GenBank |                  | CY164158         |
| A/Duck/Thailand/CU-13011C/2013_N1                    | GenBank |                  | KJ525983         |
| A/Aquatic_Bird/Hong_Kong/m603/98_H11N1               | GenBank |                  | AF098551         |
| A/Mallard/Sweden/4737/2004_N1                        | GenBank |                  | CY183476         |
| A/Black-headed_gull/Republic_of_Georgia/1/2010_H11N1 | GenBank |                  | CY185411         |
| A/Black-headed_gull/Republic_of_Georgia/2/2011_H9N1  | GenBank |                  | CY185523         |
| A/Ruddy_turnstone/Iceland/2899/2013_H5N1             | GenBank |                  | KM213392         |
| A/Chicken/Taiwan/0824/97_H6N1                        | GenBank |                  | DQ376693         |
| A/Chicken/Taiwan/na3/98_H6N1                         | GenBank |                  | DQ376694         |
| A/Chicken/Taiwan/165/99_H6N1                         | GenBank |                  | DQ376698         |
| A/Duck/Taiwan/WB29/99_H6N1                           | GenBank |                  | DQ376699         |
| A/Duck/Taiwan/A68/03_H6N1                            | GenBank |                  | DQ376718         |

| Viral Name                                    | Source  | Accession number | Accession number |
|-----------------------------------------------|---------|------------------|------------------|
|                                               |         | HA segment       | NA segment       |
| A/Swine/Fujian/2001_H5N1                      | GenBank |                  | DQ432038         |
| A/Pekin_Duck/France/M-2060/01_H1N1            | GenBank |                  | AJ697876         |
| A/Environment/Hong_Kong/437-4/99_H5N1         | GenBank |                  | AF216714         |
| A/Environment/Hong_Kong/437-10/99_H5N1        | GenBank |                  | AF216738         |
| A/Mallard/Netherlands/85/2006_N2              | GenBank |                  | KR862609         |
| A/Mallard/Netherlands/12/2006_H5N2            | GenBank |                  | KR862611         |
| A/Mallard/Netherlands/43/2006_H5N2            | GenBank |                  | KR862612         |
| A/Mallard/Netherlands/58/2006_H4N2            | GenBank |                  | KR862614         |
| A/Mallard/Netherlands/63/2006_H5N2            | GenBank |                  | KR862615         |
| A/Bewicks_swan/Netherlands/4/2006_H9N2        | GenBank |                  | KR862616         |
| A/Mallard/Netherlands/85/2008_N2              | GenBank |                  | KR862617         |
| A/White-fronted_goose/Netherlands/8/2009_H6N2 | GenBank |                  | KR862635         |
| A/Bewicks_swan/Netherlands/1/2010_H5N2        | GenBank |                  | KR862637         |
| A/White-fronted_goose/Netherlands/6/2010_H6N2 | GenBank |                  | KR862639         |
| A/White-fronted_goose/Netherlands/7/2011_N2   | GenBank |                  | KR862642         |
| A/Mallard/Netherlands/13/2005_H6N2            | GenBank |                  | KR862600         |
| A/Eurasian_wigeon/Netherlands/2/2005_H1N2     | GenBank |                  | KR862601         |
| A/Eurasian_wigeon/Netherlands/5/2005_N2       | GenBank |                  | KR862603         |
| A/Mallard/Netherlands/19/2005_H3N2            | GenBank |                  | KR862605         |
| A/Mallard/Netherlands/19/2007_H6N2            | GenBank |                  | KR862643         |
| A/Mallard/Netherlands/3/2008_H6N2             | GenBank |                  | KR862644         |
| A/Mallard/Netherlands/5/2009_H5N2             | GenBank |                  | KR862645         |
| A/Mallard/Netherlands/43/2008_H3N2            | GenBank |                  | KR862646         |
| A/Mallard/Netherlands/44/2008_H3N2            | GenBank |                  | KR862647         |
| A/Mallard/Netherlands/45/2008_H4N2            | GenBank |                  | KR862648         |
| A/Bewicks_swan/Netherlands/5/2008_H5N2        | GenBank |                  | KR862651         |
| A/White-fronted_goose/Netherlands/5/2008_H5N2 | GenBank |                  | KR862652         |
| A/White-fronted_goose/Netherlands/4/2009_H5N2 | GenBank |                  | KR862653         |
| A/Mallard/Netherlands/18/2009_H6N2            | GenBank |                  | KR862654         |
| A/Eurasian_wigeon/Netherlands/1/2009_H5N2     | GenBank |                  | KR862655         |
| A/Black-headed_gull/Netherlands/8/2010_H13N2  | GenBank |                  | KR862656         |
| A/Mallard/Netherlands/28/2010_H5N2            | GenBank |                  | KR862657         |
| A/Mallard/Netherlands/34/2010_H3N2            | GenBank |                  | KR862658         |
| A/Mallard/Netherlands/13/2011_H3N2            | GenBank |                  | KR862659         |
| A/Eurasian_wigeon/Netherlands/1/2011_N2       | GenBank |                  | KR862660         |
| A/Mallard/Netherlands/17/2012_H3N2            | GenBank |                  | KR862663         |
| A/Mallard/Netherlands/27/2012_N2              | GenBank |                  | KR862665         |
| A/Mallard/Netherlands/15/2012_H3N2            | GenBank |                  | KR862664         |
| A/Mallard/Netherlands/27/2008_H3N2            | GenBank |                  | KR862667         |
| A/Mallard/Netherlands/50/2008_H3N2            | GenBank |                  | KR862668         |
| A/Mallard/Netherlands/52/2008_H5N2            | GenBank |                  | KR862674         |
| A/White-fronted_goose/Netherlands/6/2008_H5N2 | GenBank |                  | KR862675         |
| A/Eurasian_wigeon/Netherlands/1/2010_H5N2     | GenBank |                  | KR862676         |
| A/Mallard/Netherlands/55/2010_H3N2            | GenBank |                  | KR862677         |
| A/Mallard/Netherlands/18/2012_H4N2            | GenBank |                  | KR862680         |
| A/Wild_duck/Germany/WV2555/2006_H3N2          | GISAID  |                  | EPI185342        |
| A/Pheasant/Ireland/PV12-010728/12_H5N2        | GISAID  |                  | EPI375596        |
| A/Chicken/Italy/11VIR-7548/2011_H5N2          | GISAID  |                  | EPI464929        |
| A/Turkey/Italy/12VIR-6607-5/2012_H5N2         | GISAID  |                  | EPI464937        |
| A/Chicken/Italy/12VIR-7785-67/2012_H5N2       | GISAID  |                  | EPI464945        |
| A/Turkey/Italy/12VIR-8036-2/2012_H5N2         | GISAID  |                  | EPI464953        |
| A/Mule_duck/Bulgaria/61/2010_mixed            | GISAID  |                  | EPI574173        |
| A/Mule_duck/Bulgaria/64/2010_mixed            | GISAID  |                  | EPI574211        |
| A/Mule_duck/Bulgaria/369/2009_H4N2            | GISAID  |                  | EPI574213        |
| A/Mule_duck/Bulgaria/105/2008_mixed           | GISAID  |                  | EPI574258        |
| A/Mule_duck/Bulgaria/174/2009_H6N2            | GISAID  |                  | EPI574265        |
| A/Mule_duck/Bulgaria/596/2010_H4N2            | GISAID  |                  | EPI574276        |
| A/Duck/Hong_Kong/301/1978_H7N2                | GenBank |                  | AB302790         |
| A/Korea/KBNP-0028/2000_H9N2                   | GenBank |                  | EF620902         |
| A/Garganey/SanJiang/160/2006_H5N2             | GenBank |                  | EF634334         |
| A/Duck/Jiang_Xi/1286/2005_H5N2                | GenBank |                  | EF597303         |
| A/Duck/Jiang_Xi/3345/2005_H5N2                | GenBank |                  | EF597310         |
| A/Duck/Eastern_China/164/2002_H6N2            | GenBank |                  | EU429762         |
| A/Swine/Korea/C13/2008_H5N2                   | GenBank |                  | FJ461597         |
| A/Duck/Primorie/2621/2001_H5N2                | GenBank |                  | GQ162788         |
| A/Spotbill_duck/Xuyi/18/2005_H5N2             | GenBank |                  | GQ184331         |
| A/Spotbill_duck/Xuyi/6/2005_H11N2             | GenBank |                  | GQ184332         |
| A/Mallard/Xuyi/10/2005_H5N2                   | GenBank |                  | GQ184334         |
| A/Duck/Tsukuba/9/2005_H2N2                    | GenBank |                  | AB472017         |
| A/Mallard/Netherlands/2/2005_H4N2             | GenBank |                  | CY041252         |



| Viral Name                                     | Source  | Accession number | Accession number |
|------------------------------------------------|---------|------------------|------------------|
|                                                |         | HA segment       | NA segment       |
| A/Mallard/Netherlands/26/2005_H11N2            | GenBank |                  | CY041420         |
| A/Duck/Shimane/19/2006_H5N2                    | GenBank |                  | AB472053         |
| A/Duck/Niigata/477/2007_H5N2                   | GenBank |                  | AB472055         |
| A/Wild_bird/Korea/A81/2009_H5N2                | GenBank |                  | GU086246         |
| A/Duck/Korea/A14/2008_H5N2                     | GenBank |                  | GU086248         |
| A/Duck/Korea/A93/2008_H5N2                     | GenBank |                  | GU086249         |
| A/Gadwall/Altai/1202/2007_H5N2                 | GenBank |                  | CY049758         |
| A/Mallard/Netherlands/3/1999_H5N2              | GenBank |                  | GU052558         |
| A/Mallard/Sweden/7/2002_H5N2                   | GenBank |                  | GU052566         |
| A/Chicken/France/03426/2003_H5N2               | GenBank |                  | CY046126         |
| A/Duck/France/080032/2008_H5N2                 | GenBank |                  | CY046176         |
| A/Aquatic_bird/Korea/W96/2005_H5N2             | GenBank |                  | GU361236         |
| A/Aquatic_bird/Korea/W113/2006_H5N2            | GenBank |                  | GU361237         |
| A/Aquatic_bird/Korea/W114/2006_H5N2            | GenBank |                  | GU361238         |
| A/Aquatic_bird/Korea/W121/2006_H5N2            | GenBank |                  | GU361240         |
| A/Aquatic_bird/Korea/W125/2006_H5N2            | GenBank |                  | GU361241         |
| A/Aquatic_bird/Korea/W163/2007_H5N2            | GenBank |                  | GU361244         |
| A/Aquatic_bird/Korea/W216/2007_H5N2            | GenBank |                  | GU361256         |
| A/Aquatic_bird/Korea/W230/2007_H5N2            | GenBank |                  | GU361262         |
| A/Aquatic_bird/Korea/W234/2007_H5N2            | GenBank |                  | GU361264         |
| A/Aquatic_bird/Korea/W344/2008_H5N2            | GenBank |                  | GU361267         |
| A/Mallard/Sweden/4/2002_H10N2                  | GenBank |                  | CY060302         |
| A/Teal/Norway/10_1360/2007_H4N2                | GenBank |                  | FN773069         |
| A/Duck/Fujian/11339/2005_H6N2                  | GenBank |                  | HM144700         |
| A/Duck/Fujian/8719/2005_H6N2                   | GenBank |                  | HM144699         |
| A/Duck/Fujian/7033/2005_H6N2                   | GenBank |                  | HM144698         |
| A/Duck/Fujian/5643/2005_H6N2                   | GenBank |                  | HM144697         |
| A/Duck/Fujian/5426/2005_H6N2                   | GenBank |                  | HM144696         |
| A/Duck/Fujian/5117/2005_H6N2                   | GenBank |                  | HM144695         |
| A/Duck/Fujian/4125/2005_H6N2                   | GenBank |                  | HM144694         |
| A/Duck/Fujian/3937/2005_H6N2                   | GenBank |                  | HM144693         |
| A/Duck/Fujian/3701/2005_H6N2                   | GenBank |                  | HM144692         |
| A/Duck/Fujian/3193/2005_H6N2                   | GenBank |                  | HM144691         |
| A/Duck/Fujian/1695/2005_H6N2                   | GenBank |                  | HM144689         |
| A/Duck/Fujian/629/2005_H6N2                    | GenBank |                  | HM144688         |
| A/Duck/Fujian/420/2005_H6N2                    | GenBank |                  | HM144687         |
| A/Duck/Shantou/22596/2005_H6N2                 | GenBank |                  | HM144679         |
| A/Mallard/Shantou/198/2005_H6N2                | GenBank |                  | HM144661         |
| A/Wild_duck/Shantou/180/2005_H6N2              | GenBank |                  | HM144660         |
| A/Wild_duck/Shantou/7900/2004_H6N2             | GenBank |                  | HM144658         |
| A/Wild_duck/Shantou/7307/2004_H6N2             | GenBank |                  | HM144656         |
| A/Wild_duck/Shantou/3433/2003_H6N2             | GenBank |                  | HM144645         |
| A/Wild_duck/Shantou/2853/2003_H6N2             | GenBank |                  | HM144642         |
| A/Mallard/Netherlands/7/2007_H4N2              | GenBank |                  | CY076923         |
| A/Mallard/Sweden/74/2003_H5N2                  | GenBank |                  | CY076931         |
| A/Herring_gull/Atyrau/2186/2007_H11N2          | GenBank |                  | HQ541743         |
| A/Swine/KU/16/2001_H7N2                        | GenBank |                  | CY067688         |
| A/Duck/France/05057a/2005_H6N2                 | GenBank |                  | AM489442         |
| A/Spur-winged_goose/Nigeria/226/2008_H5N2      | GenBank |                  | FR771826         |
| A/Spur-winged_goose/Nigeria/210/2008_H5N2      | GenBank |                  | FR771827         |
| A/Spur-winged_goose/Nigeria/2/2008_H5N2        | GenBank |                  | FR771828         |
| A/Avian/Japan/8K10148/2008_H4N2                | GenBank |                  | CY088723         |
| A/Ostrich/South_Africa/9508103/95_H9N2         | GenBank |                  | AF508575         |
| A/Chicken/Korea/99029/99_H9N2                  | GenBank |                  | AF508582         |
| A/Chicken/Eastern_China/43/2007_H6N2           | GenBank |                  | JF965302         |
| A/Teal/Norway/10_1037/2010_H3N2                | GenBank |                  | FR873768         |
| A/Mallard/Norway/10_1368/2010_H6N2             | GenBank |                  | FR873773         |
| A/Avian/Israel/289/2001_H6N2                   | GenBank |                  | JN575028         |
| A/Chicken/Korea/KNUSWR09/2009_H9N2             | GenBank |                  | JN852797         |
| A/Duck/Jiangxi/5748/2006_H6N2                  | GenBank |                  | CY109332         |
| A/Mallard/Netherlands/14/2007_H2N2             | GenBank |                  | CY121977         |
| A/Mallard/Sweden/58112/2006_H2N2               | GenBank |                  | CY121929         |
| A/Mallard/Sweden/58451/2006_H2N2               | GenBank |                  | CY121937         |
| A/Mallard/Sweden/68735/2007_H2N2               | GenBank |                  | CY121945         |
| A/White-fronted_goose/Netherlands/22/1999_H2N2 | GenBank |                  | CY121961         |
| A/Mallard/Sweden/99858/2009_H6N2               | GenBank |                  | JX566198         |
| A/Mallard/Sweden/99843/2009_H6N2               | GenBank |                  | JX566185         |
| A/Mallard/Sweden/99820/2009_H11N2              | GenBank |                  | JX566177         |
| A/Mallard/Sweden/100537/2009_H6N2              | GenBank |                  | JX566222         |
| A/Duck/Japan/9U0036/2009_H5N2                  | GenBank |                  | JX673923         |

| Viral Name                                       | Source  | Accession number | Accession number |
|--------------------------------------------------|---------|------------------|------------------|
|                                                  |         | HA segment       | NA segment       |
| A/Duck/Japan/9U0139/2009_H5N2                    | GenBank |                  | JX673929         |
| A/Duck/Japan/9U0025/2009_H5N2                    | GenBank |                  | JX673936         |
| A/Duck/Jiangsu/26/2004_H3N2                      | GenBank |                  | KC261671         |
| A/Mallard/Finland/13748/2007_H5N2                | GenBank |                  | KF183617         |
| A/Mallard/Sweden/21/2002_H5N2                    | GenBank |                  | KF695272         |
| A/Chicken/New_Jersey/251-4/2008_H5N2             | GenBank |                  | KJ018202         |
| A/Mallard/Sweden/274/2002_H4N2                   | GenBank |                  | CY164218         |
| A/Mallard/Sweden/906/2002_H4N2                   | GenBank |                  | CY164258         |
| A/Mallard/Sweden/1195/2002_H4N2                  | GenBank |                  | CY164274         |
| A/Mallard/Sweden/58359/2006_mixed                | GenBank |                  | CY165021         |
| A/Mallard/Sweden/58463/2006_mixed                | GenBank |                  | CY165049         |
| A/Mallard/Sweden/68504/2007_H4N2                 | GenBank |                  | CY165100         |
| A/Mallard/Netherlands/1/2007_H3N2                | GenBank |                  | CY043818         |
| A/Eurasian_wigeon/Netherlands/3/2005_H9N2        | GenBank |                  | CY043858         |
| A/Mallard/Sweden/58705/2006_H5N2                 | GenBank |                  | CY184143         |
| A/Mallard/Sweden/79196/2008_mixed                | GenBank |                  | CY184415         |
| A/Migratory_duck/Jiangxi/10861/2005_H10N2        | GenBank |                  | KP287808         |
| A/Duck/Nanchang/1749/1992_H11N2                  | GenBank |                  | CY005532         |
| A/Chicken/Korea/MS96/96_H9N2                     | GenBank |                  | AF203786         |
| A/Muskrat/Russia/63/2014_H2N2                    | GenBank |                  | KR052706         |
| A/Duck/Denmark/65047/04_H5N2                     | GenBank |                  | DQ251448         |
| A/Dk/Hong_Kong/293/1978_H7N2                     | GenBank |                  | CY005620         |
| A/Duck/Kingmen/E322/04_H6N2                      | GenBank |                  | DQ376721         |
| A/Ruddy_turnstone/Netherlands/1/2008_H10N4       | GenBank |                  | KR862686         |
| A/Ruddy_turnstone/Netherlands/5/2008_H10N4       | GenBank |                  | KR862688         |
| A/Ruddy_turnstone/Netherlands/1/2009_H10N4       | GenBank |                  | KR862689         |
| A/Mallard/Netherlands/11/2006_H8N4               | GenBank |                  | KR862681         |
| A/Mallard/Netherlands/13/2006_H8N4               | GenBank |                  | KR862682         |
| A/Mallard/Netherlands/30/2011_H6N4               | GenBank |                  | KR862693         |
| A/Ruddy_Turnstone/Delaware/67/98_H12N4           | GISAID  |                  | EPI16616         |
| A/Pintail/Alaska/314/2005_H12N4                  | GISAID  |                  | EPI307548        |
| A/Blue-winged_teal/Guatemala/CIP049-04/2010_H8N4 | GenBank |                  | CY096650         |
| A/Red_knot/Delaware_Bay/227/1994_mixed           | GISAID  |                  | EPI345275        |
| A/Shorebird/Delaware_Bay/215/1994_mixed          | GISAID  |                  | EPI437174        |
| A/Ruddy_turnstone/Delaware_Bay/124/1994_mixed    | GISAID  |                  | EPI437442        |
| A/Ruddy_turnstone/Delaware_Bay/150/1994_H1N4     | GISAID  |                  | EPI437470        |
| A/Mallard/Sweden/100546/2009_H8N4                | GenBank |                  | JX566224         |
| A/Blue-winged_teal/ALB/685/1982_H6N4             | GISAID  |                  | EPI85929         |
| A/Mallard_duck/Alberta/299/1977_H4N4             | GISAID  |                  | EPI87231         |
| A/Mallard/Alberta/194/1992_H8N4                  | GISAID  |                  | EPI87925         |
| A/Duck/Hokkaido/18/00_H10N4                      | GenBank |                  | AB274042         |
| A/Chicken/New_South_Wales/2/1997_H7N4            | GenBank |                  | CY022695         |
| A/Chicken/New_South_Wales/327/1997_H7N4          | GenBank |                  | CY022703         |
| A/Emu/New_South_Wales/775/1997_H7N4              | GenBank |                  | CY022711         |
| A/Duck/Eastern_China/01/2005_H8N4                | GenBank |                  | EU429780         |
| A/Mallard/Iran/V16/04_H8N4                       | GenBank |                  | AM933239         |
| A/Duck/Hubei/137/1985_H10N4                      | GenBank |                  | EU559265         |
| A/Mink/Sweden/3900/1984_H10N4                    | GenBank |                  | GQ176142         |
| A/Mallard/Gloucestershire/PD374/1985_H10N4       | GenBank |                  | GQ176126         |
| A/Fowl/Hampshire/PD378/1985_H10N4                | GenBank |                  | GQ176118         |
| A/Whistling_swan/Shimane/468/1988_H10N4          | GenBank |                  | GQ176110         |
| A/Anas_plathyrhynchos/Spain/1495/2008_H10N4      | GenBank |                  | FN386476         |
| A/Anas_plathyrhynchos/Spain/1502/2008_H8N4       | GenBank |                  | FN386477         |
| A/Gray_teal/Western_Australia/1840/1979_H4N4     | GenBank |                  | CY045265         |
| A/Chicken/NSW/1651/1997_H7N4                     | GenBank |                  | GU053096         |
| A/Mallard/Sweden/8/2003_H8N4                     | GenBank |                  | CY060406         |
| A/Mallard/PT/9408-3/2006_H9N4                    | GenBank |                  | HM849002         |
| A/Duck/Victoria/24/1981_H8N4                     | GenBank |                  | CY094945         |
| A/Teal/Chany/7119/2008_H15N4                     | GenBank |                  | CY098542         |
| A/Duck/Tsukuba/20/2007_H8N4                      | GenBank |                  | AB669141         |
| A/Duck/Thailand/CU-9754C/2010_H7N4               | GenBank |                  | JX307164         |
| A/Duck/Thailand/CU-10524C/2011_H7N4              | GenBank |                  | JX307193         |
| A/Duck/Thailand/CU-9744C_/2010_H7N4              | GenBank |                  | JX307210         |
| A/Environment/Korea/PSC13-43/2008_H8N4           | GenBank |                  | JX679162         |
| A/Mallard/Alberta/58/1989_H6N4                   | GenBank |                  | CY126443         |
| A/Ruddy_turnstone/Delaware/AI03-378/2003_H12N4   | GenBank |                  | CY144383         |
| A/Duck/Thailand/CU-10510C/2011_H7N4              | GenBank |                  | KF591867         |
| A/Mallard/Sweden/17/2002_H10N4                   | GenBank |                  | KF695363         |
| A/Mallard/Wisconsin/772/1982_H6N4                | GenBank |                  | CY178136         |
| A/Duck/Wisconsin/2366/1985_N4                    | GenBank |                  | CY177458         |

| Viral Name                                          | Source  | Accession number | Accession number |
|-----------------------------------------------------|---------|------------------|------------------|
|                                                     |         | HA segment       | NA segment       |
| A/Mallard/Wisconsin/1360/1983_H7N4                  | GenBank |                  | CY179525         |
| A/Mallard/Sweden/396/2002_H10N4                     | GenBank |                  | CY184618         |
| A/Mallard_duck/ALB/7/1987_H8N4                      | GenBank |                  | CY004998         |
| A/Mallard_duck/ALB/581/1983_H4N4                    | GenBank |                  | CY004813         |
| A/Mallard/Netherlands/83/2008_H12N5                 | GenBank |                  | KR862695         |
| A/Eurasian_wigeon/Netherlands/2/2009_H12N5          | GenBank |                  | KR862696         |
| A/Mallard/Netherlands/4/2011_H12N5                  | GenBank |                  | KR862698         |
| A/Mallard/Netherlands/13/2008_H4N5                  | GenBank |                  | KR862699         |
| A/Duck/Hokkaido/24/04_H10N5                         | GISAID  |                  | EPI160652        |
| A/Mallard/Denmark/77-64590-5/2005_H7N5              | GISAID  |                  | EPI174859        |
| A/Mallard/California/6524/2008_H12N5                | GISAID  |                  | EPI328292        |
| A/Mallard/Alberta/220/2006_                         | GISAID  |                  | EPI343416        |
| A/Mallard/Alberta/12/1993_                          | GISAID  |                  | EPI344668        |
| A/Arenaria_interpres/Belgium/02936pcs1/2010_H12N5   | GISAID  |                  | EPI345387        |
| A/Mallard/Ohio/170/1999_H6N5                        | GISAID  |                  | EPI44086         |
| A/Emperor_goose/Alaska/44064-075/2006_H2N5          | GISAID  |                  | EPI442443        |
| A/Mallard/Minnesota/182729/1998_H6N5                | GISAID  |                  | EPI448392        |
| A/Green-winged_teal/Minnesota/Sg-00820/2008_H4N5    | GISAID  |                  | EPI449492        |
| A/Ruddy_turnstone/New_Jersey/AI07-697/2007_H12N5    | GISAID  |                  | EPI454987        |
| A/Ruddy_turnstone/New_Jersey/AI07-803/2007_H12N5    | GISAID  |                  | EPI455001        |
| A/Mule_duck/Bulgaria/674/2010_H6N5                  | GISAID  |                  | EPI574266        |
| A/Mallard/Alberta/202/1996_H2N5                     | GISAID  |                  | EPI85385         |
| A/Pintail/Alberta/49/2003_H9N5                      | GISAID  |                  | EPI86317         |
| A/Mallard/Alberta/52/1997_H12N5                     | GISAID  |                  | EPI86417         |
| A/Green-winged_teal/ALB/199/1991_H12N5              | GISAID  |                  | EPI88775         |
| A/Duck/Hokkaido/66/01_H12N5                         | GenBank |                  | AB270747         |
| A/Duck/Hokkaido/1058/2001_H4N5                      | GenBank |                  | AB270594         |
| A/Chicken/Hubei/119/1983_H10N5                      | GenBank |                  | EU559271         |
| A/Duck/Tsukuba/11/2004_H6N5                         | GenBank |                  | AB472026         |
| A/Duck/Shiga/69/2006_H6N5                           | GenBank |                  | AB472027         |
| A/Anas_plathyrhynchos/Spain/1252/2007_H6N4          | GenBank |                  | FN386470         |
| A/Mallard/Switzerland/WV4060167/2006_H3N5           | GenBank |                  | GQ415323         |
| A/Duck/Yangzhou/013/2008_H6N5                       | GenBank |                  | GU220601         |
| A/Duck/Eastern_China/031/2009_H5N5                  | GenBank |                  | GU272663         |
| A/Duck/Eastern_China/008/2008_H5N5                  | GenBank |                  | GU272655         |
| A/Mallard/Netherlands/2/1999_H3N5                   | GenBank |                  | CY060263         |
| A/Black-headed_gull/Netherlands/1/2006_H4N5         | GenBank |                  | CY076994         |
| A/Avian/Japan/8KI0040/2008_H3N5                     | GenBank |                  | CY079277         |
| A/Duck/Vietnam/G18/2009_H12N5                       | GenBank |                  | AB593481         |
| A/Duck/Mongolia/OIE-7457/2011_H3N5                  | GenBank |                  | AB701297         |
| A/Goose/Guangdong/K0103/2010_H5N5                   | GenBank |                  | JQ973688         |
| A/Quail/Jiangsu/K0104/2010_H5N5                     | GenBank |                  | JQ973680         |
| A/Mallard/Sweden/30/2002_H2N5                       | GenBank |                  | CY122069         |
| A/Duck/Guangxi/GXd-1/2009_H6N5                      | GenBank |                  | JX293561         |
| A/Aquatic_bird/Korea/CN5/2009_H6N5                  | GenBank |                  | JX465642         |
| A/Swine/Hubei/10/2008_H10N5                         | GenBank |                  | JX500445         |
| A/Mallard/Sweden/100127/2009_H12N5                  | GenBank |                  | JX566221         |
| A/Wild_duck/Korea/SH12-7/2008_H10N5                 | GenBank |                  | JX679163         |
| A/Duck/HuBei/03/2010_H5N5                           | GenBank |                  | JX878685         |
| A/Ruddy_turnstone/Delaware_Bay/118/2007_mixed       | GenBank |                  | CY127777         |
| A/Duck/Vietnam/OIE-707/2011_H11N5                   | GenBank |                  | AB781683         |
| A/Mallard/Astrakhan/263/1982_H14N5                  | GenBank |                  | AB289336         |
| A/Ruddy_turnstone/New_Jersey/AI07-796/2007_H12N5    | GenBank |                  | CY144725         |
| A/Mallard/Finland/10952/2008_H4N5                   | GenBank |                  | KF183615         |
| A/Black-headed_gull/Iceland/1298/2011_H10N5         | GenBank |                  | CY149486         |
| A/Duck/Guangdong/Wy11/2008_H5N5                     | GenBank |                  | CY091629         |
| A/Duck/Guangdong/Wy19/2008_H5N5                     | GenBank |                  | CY091637         |
| A/Duck/Guangdong/Wy24/2008_H5N5                     | GenBank |                  | CY091645         |
| A/Mallard/Sweden/50709/2006_H4N5                    | GenBank |                  | CY164570         |
| A/Mallard/Sweden/343/2002_H12N5                     | GenBank |                  | CY184001         |
| A/Mallard/Sweden/2213/2003_H12N5                    | GenBank |                  | CY184025         |
| A/Mallard/Sweden/3328/2003_H12N5                    | GenBank |                  | CY184033         |
| A/Mallard/Sweden/50968/2006_H12N5                   | GenBank |                  | CY184041         |
| A/Mallard/Sweden/60069/2007_H12N5                   | GenBank |                  | CY184049         |
| A/Mallard/Sweden/68529/2007_H12N5                   | GenBank |                  | CY184057         |
| A/Black-headed_gull/Republic_of_Georgia/9/2012_H2N5 | GenBank |                  | CY185619         |
| A/Mallard/Sweden/79389/2008_mixed                   | GenBank |                  | CY186278         |
| A/Mallard/Sweden/80329/2008_H11N5                   | GenBank |                  | CY186398         |
| A/Mallard/Alberta/26/2001_mixed                     | GenBank |                  | CY185798         |
| A/Migratory_duck/Jiangxi/31454/2013_H10N5           | GenBank |                  | KP284895         |

| Viral Name                                 | Source  | Accession number | Accession number |
|--------------------------------------------|---------|------------------|------------------|
|                                            |         | HA segment       | NA segment       |
| A/Migratory_duck/Jiangxi/31577/2013_H10N5  | GenBank |                  | KP285887         |
| A/Migratory_duck/Jiangxi/7231/2003_H10N5   | GenBank |                  | KP288024         |
| A/Black_duck/AUS/4045/1980_H6N5            | GenBank |                  | CY005693         |
| A/Mallard/Netherlands/2/2007_H10N7         | GenBank |                  | KR862705         |
| A/Mallard/Netherlands/3/2007_H10N7         | GenBank |                  | KR862706         |
| A/Northern_shoveler/Egypt/EMC-4/2012_H10N7 | GenBank |                  | KR862401         |
| A/Mallard/Netherlands/68/2008_H10N7        | GenBank |                  | KR862712         |
| A/Mallard/Netherlands/3/2009_H7N7          | GenBank |                  | KR862718         |
| A/Mallard/Netherlands/7/2009_H7N7          | GenBank |                  | KR862721         |
| A/Mallard/Netherlands/21/2010_H10N7        | GenBank |                  | KR862723         |
| A/Mallard/Netherlands/22/2010_H10N7        | GenBank |                  | KR862724         |
| A/Mallard/Netherlands/23/2010_H10N7        | GenBank |                  | KR862725         |
| A/Northern_shoveler/Egypt/EMC-2/2012_H10N7 | GenBank |                  | KR862402         |
| A/Mallard/Netherlands/73/2008_H10N7        | GenBank |                  | KR862733         |
| A/Mallard/Netherlands/74/2008_H10N7        | GenBank |                  | KR862734         |
| A/Mallard/Netherlands/15/2013_H7N7         | GenBank |                  | KR862742         |
| A/Mallard/Poland/16/09_H7N7                | GISAID  |                  | EPI254380        |
| A/Turkey/Netherlands/03003568/03_H7N7      | GISAID  |                  | EPI290239        |
| A/Chicken/Germany/R1801/2011_H7N7          | GISAID  |                  | EPI356304        |
| A/Turkey/Germany/R1775/2011_H7N7           | GISAID  |                  | EPI356305        |
| A/Turkey/Germany-NI/R534/2013_H7N7         | GISAID  |                  | EPI470367        |
| A/Duck/Mongolia/583/02_H4N7                | GenBank |                  | AB289334         |
| A/Anser_anser/Germany/R752/06_H7N7         | GenBank |                  | AM933236         |
| A/Anas_crecca/Germany/Wv177/05_H7N7        | GenBank |                  | AM933237         |
| A/Whooper_swan/Norway/10_438/2006_H7N7     | GenBank |                  | FM179762         |
| A/Duck/Hokkaido/W90/2007_H10N7             | GenBank |                  | AB450445         |
| A/Duck/Taiwan/4201/99_H7N7                 | GenBank |                  | AB450450         |
| A/Mallard/Korea/GH170/2007_H7N7            | GenBank |                  | FJ750866         |
| A/Magpie/Korea/YJD174/2007_H7N7            | GenBank |                  | FJ750856         |
| A/Mallard/Sweden/S90735/2003_H7N7          | GenBank |                  | FJ803183         |
| A/Mallard/Korea/GH171/2007_H7N7            | GenBank |                  | FJ959088         |
| A/Duck/Shimane/18/2006_H7N7                | GenBank |                  | AB472030         |
| A/Duck/Shiga/B149/2007_H7N7                | GenBank |                  | AB472031         |
| A/Duck/Tsukuba/664/2007_H7N7               | GenBank |                  | AB472059         |
| A/Duck/Tsukuba/922/2008_H7N7               | GenBank |                  | AB472060         |
| A/Duck/Chiba/13/2008_H7N7                  | GenBank |                  | AB472061         |
| A/Duck/Tsukuba/30/2007_H7N7                | GenBank |                  | AB472063         |
| A/Northern_pintail/Aomori/372/2008_H7N7    | GenBank |                  | AB516423         |
| A/Northern_pintail/Aomori/1001/2008_H7N7   | GenBank |                  | AB517633         |
| A/Northern_pintail/Akita/1366/2008_H7N7    | GenBank |                  | AB517634         |
| A/Northern_pintail/Akita/1367/2008_H7N7    | GenBank |                  | AB517636         |
| A/Mallard/PT/14683/2006_H6N7               | GenBank |                  | HM849014         |
| A/Chicken/Netherlands/1/2003_H7N7          | GenBank |                  | AY340077         |
| A/Netherlands/219/03_H7N7                  | GenBank |                  | AY340079         |
| A/King_eider/Alaska/44068-067/2006_H4N7    | GenBank |                  | JX081153         |
| A/Mallard/Sweden/109/2002_H2N7             | GenBank |                  | CY122033         |
| A/Mallard/Sweden/112/2002_H2N7             | GenBank |                  | CY122049         |
| A/Mallard/Sweden/9/2003_H2N7               | GenBank |                  | CY122141         |
| A/Chicken/Germany/R28/03_H7N7              | GenBank |                  | AJ620349         |
| A/Mallard/Portugal/79905/2009_H10N7        | GenBank |                  | CY116607         |
| A/Mallard/Korea/GG2/2007_H7N7              | GenBank |                  | KC609788         |
| A/Wild_bird_feces/Korea/HDR22/2006_H7N7    | GenBank |                  | KC609785         |
| A/Wild_duck/Korea/MHC40-28/2010_H7N7       | GenBank |                  | KC609802         |
| A/Mallard/Korea/NHG187/2008_H7N7           | GenBank |                  | KC609794         |
| A/Wild_bird_feces/Korea/HDR23/2006_H7N7    | GenBank |                  | KC609786         |
| A/Mallard/64650/03_H5N7                    | GenBank |                  | AY531030         |
| A/Wild_goose/Dongting/PC0360/2012_H7N7     | GenBank |                  | KC876685         |
| A/Duck/Fukui/1/2004_H7N7                   | GenBank |                  | AB824727         |
| A/Turkey/Ireland/PV8/1995_H7N7             | GenBank |                  | KF160885         |
| A/Environment/Hunan/S4484/2011_H12N7       | GenBank |                  | CY146766         |
| A/Duck/Fujian/5408/2008_H7N7               | GenBank |                  | KF259621         |
| A/Duck/Fujian/5476/2008_H7N7               | GenBank |                  | KF259622         |
| A/Duck/Jiangxi/16309/2010_H7N7             | GenBank |                  | KF259628         |
| A/Duck/Jiangxi/16326/2010_H7N7             | GenBank |                  | KF259629         |
| A/Duck/Jiangxi/16769/2010_H7N7             | GenBank |                  | KF259630         |
| A/Duck/Jiangxi/21980/2010_H7N7             | GenBank |                  | KF259631         |
| A/Duck/Jiangxi/1717/2003_H7N7              | GenBank |                  | KF259633         |
| A/Duck/Jiangxi/1748/2003_H7N7              | GenBank |                  | KF259634         |
| A/Common_teal/Hong_Kong/MPM1670/2011_H7N7  | GenBank |                  | KF259636         |
| A/Common_teal/Hong_Kong/MPL634/2011_H7N7   | GenBank |                  | KF259637         |

| Viral Name                                          | Source  | Accession number | Accession number |
|-----------------------------------------------------|---------|------------------|------------------|
|                                                     |         | HA segment       | NA segment       |
| A/Common_teal/Hong_Kong/MPM1740/2011_H7N7           | GenBank |                  | KF259638         |
| A/Wild_waterfowl/Hong_Kong/MPL705/2011_H7N7         | GenBank |                  | KF259639         |
| A/Wild_waterfowl/Hong_Kong/MPM2121/2011_H7N7        | GenBank |                  | KF259640         |
| A/Wild_waterfowl/Hong_Kong/MPL1006/2011_H7N7        | GenBank |                  | KF259641         |
| A/Mallard/Sweden/105/2002_H7N7                      | GenBank |                  | KF695338         |
| A/Mallard/Sweden/7206/2004_H7N7                     | GenBank |                  | CY183419         |
| A/Mallard/Sweden/124987/2010_H7N7                   | GenBank |                  | CY183435         |
| A/Mallard/Sweden/6148/2005_H10N7                    | GenBank |                  | CY183704         |
| A/Mallard/Sweden/885/2002_H7N7                      | GenBank |                  | CY184506         |
| A/Mallard/Sweden/1337/2002_H7N7                     | GenBank |                  | CY184514         |
| A/Mallard/Sweden/1645/2002_H7N7                     | GenBank |                  | CY184522         |
| A/Mallard/Sweden/5944/2005_H7N7                     | GenBank |                  | CY184586         |
| A/Mallard/Republic_of_Georgia/1/2010_H10N7          | GenBank |                  | CY185419         |
| A/Domestic_duck/Republic_of_Georgia/1/2010_H10N7    | GenBank |                  | CY185451         |
| A/Domestic_duck/Republic_of_Georgia/2/2010_H10N7    | GenBank |                  | CY185459         |
| A/Black-headed_gull/Republic_of_Georgia/7/2012_H2N7 | GenBank |                  | CY185651         |
| A/Black-headed_gull/Republic_of_Georgia/8/2012_H2N7 | GenBank |                  | CY185699         |
| A/Mallard/Sweden/1628/2002_H7N7                     | GenBank |                  | CY186302         |
| A/Mallard/Sweden/1671/2002_H7N7                     | GenBank |                  | CY186310         |
| A/Mallard/Sweden/1678/2002_H7N7                     | GenBank |                  | CY186318         |
| A/Mallard/Sweden/1682/2002_H7N7                     | GenBank |                  | CY186334         |
| A/Mallard/Sweden/1448/2002_H7N7                     | GenBank |                  | CY186416         |
| A/Ruddy_turnstone/Iceland/1946/2012_H2N7            | GenBank |                  | KM213382         |
| A/Duck/Jiangxi/5879/2008_mixed                      | GenBank |                  | KP287687         |
| A/Duck/Jiangxi/1410/2008_H10N7                      | GenBank |                  | KP287896         |
| A/Duck/Jiangxi/1591/2008_H10N7                      | GenBank |                  | KP287912         |
| A/Chicken/Jiangxi/10784/2014_H7N7                   | GenBank |                  | KP414901         |
| A/Wild_bird/Jiangxi/34458/2013_H7N7                 | GenBank |                  | KP417105         |
| A/Wild_bird/Jiangxi/35982/2013_H7N7                 | GenBank |                  | KP417121         |
