# Supplementary material for: Discordant detection of avian influenza virus subtypes in time and space between poultry and wild birds; Towards improvement of surveillance programs
Source: PubMed Central journal article supplement (PMC5344487; doi:10.1371/journal.pone.0173470), 2017-03-09
Supplement: pone.0173470.s004.pdf [file pone.0173470.s004.pdf]

## Supporting Information

**S2 Table. Details of the low pathogenic avian influenza virus (LPAIV) sequences downloaded from the GISAID EpiFlu Database.** We gratefully acknowledge the authors, originating and submitting laboratories of the sequences from GISAID EpiFlu Database on which this research is based. All submitters of data may be contacted directly via the GISAID website.

| Isolate name                                         | Accession number<br>HA segment | Accession number<br>NA segment | Country  | Collection Date | Originating Laboratory                              | Submitting Laboratory                                                       | Authors                                                                                                                                                                       |
|------------------------------------------------------|--------------------------------|--------------------------------|----------|-----------------|-----------------------------------------------------|-----------------------------------------------------------------------------|-------------------------------------------------------------------------------------------------------------------------------------------------------------------------------|
| A/Teal/Egypt/20431-NAMRU3/2003_H1N2                  | EPI372275                      |                                | Egypt    | 22-Dec-2003     | U.S. Naval Medical Research Unit No.3               | Centers for Disease Control and Prevention                                  | Gerloff, Nancy; Simpson, Natosha; Jones, Joyce; Kis, Zoltan; Bahgat, Verina; Soliman, Atef; Ellassal, Emad; Ahmed, Lu'ay; Gaynor, Anne; Cornelius, Claire; Davis, Todd        |
| A/Shoveler/Egypt/00134-NAMRU3/2005_H1N1              | EPI372331                      |                                | Egypt    | 13-Jan-2005     | U.S. Naval Medical Research Unit No.3               | Centers for Disease Control and Prevention                                  | Gerloff, Nancy; Simpson, Natosha; Jones, Joyce; Kis, Zoltan; Bahgat, Verina; Soliman, Atef; Ellassal, Emad; Ahmed, Lu'ay; Gaynor, Anne; Cornelius, Claire; Davis, Todd        |
| A/Shoveler/Egypt/14029-NAMRU3/2006_H1N1              | EPI372378                      | EPI372377                      | Egypt    | 8-Dec-2006      | U.S. Naval Medical Research Unit No.3               | Centers for Disease Control and Prevention                                  | Gerloff, Nancy; Simpson, Natosha; Jones, Joyce; Kis, Zoltan; Bahgat, Verina; Soliman, Atef; Ellassal, Emad; Ahmed, Lu'ay; Gaynor, Anne; Cornelius, Claire; Davis, Todd        |
| A/Teal/Egypt/01351-NAMRU3/2007_H1N1                  | EPI372466                      | EPI372465                      | Egypt    | 26-Jan-2007     | U.S. Naval Medical Research Unit No.3               | Centers for Disease Control and Prevention                                  | Gerloff, Nancy; Simpson, Natosha; Jones, Joyce; Kis, Zoltan; Bahgat, Verina; Soliman, Atef; Ellassal, Emad; Ahmed, Lu'ay; Gaynor, Anne; Cornelius, Claire; Davis, Todd        |
| A/Teal/Egypt/00677-NAMRU3/2004_H1N1                  | EPI372528                      |                                | Egypt    | 28-Jan-2004     | U.S. Naval Medical Research Unit No.3               | Centers for Disease Control and Prevention                                  | Gerloff, Nancy; Simpson, Natosha; Jones, Joyce; Kis, Zoltan; Bahgat, Verina; Soliman, Atef; Ellassal, Emad; Ahmed, Lu'ay; Gaynor, Anne; Cornelius, Claire; Davis, Todd        |
| A/Goose/Italy/6117/2004_H1N1                         | EPI178520                      | EPI178522                      | Italy    | 2004*           | -                                                   | Istituto Zooprofilattico Sperimentale della Lombardia e dell'Emilia Romagna | Fereidouni, S.R.                                                                                                                                                              |
| A/Mallard/Germany/R2843/06_H1N1                      | EPI222781                      |                                | Germany  | 2006*           | -                                                   | Friedrich-Loeffler-Institut                                                 | -                                                                                                                                                                             |
| A/Mallard/Germany-RP/R193/09_H1N1                    | EPI248501                      | EPI248500                      | Germany  | 2009*           | -                                                   | Friedrich-Loeffler-Institut                                                 | -                                                                                                                                                                             |
| A/Wild_duck/Germany/WV30/06_H1N1                     | EPI248514                      | EPI248512                      | Germany  | 2006*           | -                                                   | Friedrich-Loeffler-Institut                                                 | -                                                                                                                                                                             |
| A/Mallard/Germany/WV35/07_H1N1                       | EPI248519                      | EPI248517                      | Germany  | 2007*           | -                                                   | Friedrich-Loeffler-Institut                                                 | -                                                                                                                                                                             |
| A/Wild_duck/Germany-NW/R04/08_H1N1                   | EPI248521                      |                                | Germany  | 2008*           | -                                                   | Friedrich-Loeffler-Institut                                                 | -                                                                                                                                                                             |
| A/Anas_platyrhynchos/Belgium/09-762/2008_H1N1        | EPI257212                      | EPI257214                      | Belgium  | Nov-2008*       | Veterinary and Agrochemical Research Institute      | Veterinary and Agrochemical Research Institute                              | Van Borm, Steven                                                                                                                                                              |
| A/Wild_duck/Korea/CSM38/2004b_H1N1                   | EPI296244                      |                                | Korea    | Nov-2004*       | -                                                   | Other database import                                                       | Jeong, O.-M.; Kim, Y.-J.; Choi, J.-G.; Kang, H.-M.; Kim, M.-C.; Kwon, J.-H.; Lee, Y.-J.                                                                                       |
| A/Duck/Italy/7686-11/10_H1N1                         | EPI301849                      |                                | Italy    | 15-Dec-2010     | Istituto Zooprofilattico Sperimentale Delle Venezie | Istituto Zooprofilattico Sperimentale Delle Venezie                         | Monne, I.; Fusaro, A.; Valastro, V.; Schivo, A.; Buratin, A.; Terregino, C.; Capua, I.; Cattoli, G.                                                                           |
| A/Pintail/Italy/2703-25/06_H1N1                      | EPI301856                      |                                | Italy    | 5-Sep-2006      | Istituto Zooprofilattico Sperimentale Delle Venezie | Istituto Zooprofilattico Sperimentale Delle Venezie                         | Monne, I.; Fusaro, A.; Valastro, V.; Schivo, A.; Buratin, A.; Terregino, C.; Capua, I.; Cattoli, G.                                                                           |
| A/Mallard/Italy/378-49/06_H1N1                       | EPI301857                      |                                | Italy    | 4-May-2006      | Istituto Zooprofilattico Sperimentale Delle Venezie | Istituto Zooprofilattico Sperimentale Delle Venezie                         | Monne, I.; Fusaro, A.; Valastro, V.; Schivo, A.; Buratin, A.; Terregino, C.; Capua, I.; Cattoli, G.                                                                           |
| A/Teal/Italy/6323-5/07_H1N1                          | EPI301858                      |                                | Italy    | 30-Nov-2007     | Istituto Zooprofilattico Sperimentale Delle Venezie | Istituto Zooprofilattico Sperimentale Delle Venezie                         | Monne, I.; Fusaro, A.; Valastro, V.; Schivo, A.; Buratin, A.; Terregino, C.; Capua, I.; Cattoli, G.                                                                           |
| A/Mallard/Italy/432-21/08_H1N1                       | EPI301859                      |                                | Italy    | 15-Feb-2008     | Istituto Zooprofilattico Sperimentale Delle Venezie | Istituto Zooprofilattico Sperimentale Delle Venezie                         | Monne, I.; Fusaro, A.; Valastro, V.; Schivo, A.; Buratin, A.; Terregino, C.; Capua, I.; Cattoli, G.                                                                           |
| A/Shoveler/Italy/6965-6/07_H1N3                      | EPI301860                      |                                | Italy    | 1-Feb-2008      | Istituto Zooprofilattico Sperimentale Delle Venezie | Istituto Zooprofilattico Sperimentale Delle Venezie                         | Monne, I.; Fusaro, A.; Valastro, V.; Schivo, A.; Buratin, A.; Terregino, C.; Capua, I.; Cattoli, G.                                                                           |
| A/Avian/Germany-BB/R2859/2009_H6                     | EPI339183                      |                                | Germany  | 2009*           | -                                                   | Friedrich-Loeffler-Institut                                                 | -                                                                                                                                                                             |
| A/Goose/Germany-BB/R1625/2008_H6                     | EPI279941                      |                                | Germany  | 2008*           | -                                                   | Friedrich-Loeffler-Institut                                                 | -                                                                                                                                                                             |
| A/Ringed_teal/Germany-NRW/R641/2008_H6               | EPI279938                      |                                | Germany  | 2008*           | -                                                   | Friedrich-Loeffler-Institut                                                 | -                                                                                                                                                                             |
| A/Wild_bird/Germany-HH/R1501/2008_H6                 | EPI279939                      |                                | Germany  | 2008*           | -                                                   | Friedrich-Loeffler-Institut                                                 | -                                                                                                                                                                             |
| A/Wild_bird/Germany-MV/R1511/2008_H6                 | EPI279940                      |                                | Germany  | 2008*           | -                                                   | Friedrich-Loeffler-Institut                                                 | -                                                                                                                                                                             |
| A/Environment/California/NWRC182841-09/2006_H6N1     | EPI406091                      |                                | USA      | 2006*           | -                                                   | Other database import                                                       | Anderson, T.; Piaggio, T.                                                                                                                                                     |
| A/Environment/California/NWRC183200-14/2006_H6N1     | EPI406099                      |                                | USA      | 2006*           | -                                                   | Other database import                                                       | Anderson, T.; Piaggio, T.                                                                                                                                                     |
| A/Environment/California/NWRC183274-04/2006_H6N1     | EPI406103                      |                                | USA      | 2006*           | -                                                   | Other database import                                                       | Anderson, T.; Piaggio, T.                                                                                                                                                     |
| A/Green-winged_teal/Nova_Scotia/14917/2005_H6N1      | EPI327397                      |                                | Canada   | 14-Sep-2005     | -                                                   | Other database import                                                       | The NIAID Influenza Genome Sequencing Consortium                                                                                                                              |
| A/Larus_argentatus/Belgium/02936pcs3/2010_H6N1       | EPI345428                      | EPI345427                      | Belgium  | 27-Jan-2010     | Veterinary and Agrochemical Research Institute      | Veterinary and Agrochemical Research Institute                              | Van Borm, S.; Rosseel, T.; Lambrecht, B.; Vangeluwe, D.; Vandenbussche, F.; van den Berg, T.                                                                                  |
| A/Northern_shoveler/California/HKWF115/2007_H6N1     | EPI154816                      |                                | USA      | 24-Oct-2007     | -                                                   | Other database import                                                       | -                                                                                                                                                                             |
| A/Duck/Germany-MV/R871/2010_H6N2                     | EPI339182                      |                                | Germany  | 2010*           | -                                                   | Friedrich-Loeffler-Institut                                                 | -                                                                                                                                                                             |
| A/Green-winged_teal/Minnesota/Sg-00199/2007_H6N2     | EPI298290                      |                                | USA      | 14-Sep-2007     | -                                                   | Other database import                                                       | The NIAID Influenza Genome Sequencing Consortium                                                                                                                              |
| A/Green-winged_teal/Minnesota/Sg-00222/2007_H6N2     | EPI298322                      |                                | USA      | 16-Sep-2007     | -                                                   | Other database import                                                       | The NIAID Influenza Genome Sequencing Consortium                                                                                                                              |
| A/Mule_duck/Bulgaria/156/2010_H6N2                   | EPI574180                      |                                | Bulgaria | 9-Feb-2010      | -                                                   | Other database import                                                       | Marinova-Petkova, A.; Georgiev, G.; Petkov, T.; Darnell, D.; Franks, J.; Walker, D.; Seiler, P.; Danner, A.; Graham, A.; McKenzie, P.; Krauss, S.; Webby, R.J.; Webster, R.G. |
| A/Mule_duck/Bulgaria/173/2009_H6N2                   | EPI574206                      |                                | Bulgaria | 12-Jan-2009     | -                                                   | Other database import                                                       | Marinova-Petkova, A.; Georgiev, G.; Petkov, T.; Darnell, D.; Franks, J.; Walker, D.; Seiler, P.; Danner, A.; Graham, A.; McKenzie, P.; Krauss, S.; Webby, R.J.; Webster, R.G. |
| A/Shoveler/Egypt/13251-NAMRU3/2006_H6N2              | EPI372371                      | EPI372370                      | Egypt    | 2-Dec-2006      | U.S. Naval Medical Research Unit No.3               | Centers for Disease Control and Prevention                                  | Gerloff, Nancy; Simpson, Natosha; Jones, Joyce; Kis, Zoltan; Bahgat, Verina; Soliman, Atef; Ellassal, Emad; Ahmed, Lu'ay; Gaynor, Anne; Cornelius, Claire; Davis, Todd        |
| A/Teal/Egypt/13203-NAMRU3/2006_H6N2                  | EPI372386                      | EPI372385                      | Egypt    | 2-Dec-2006      | U.S. Naval Medical Research Unit No.3               | Centers for Disease Control and Prevention                                  | Gerloff, Nancy; Simpson, Natosha; Jones, Joyce; Kis, Zoltan; Bahgat, Verina; Soliman, Atef; Ellassal, Emad; Ahmed, Lu'ay; Gaynor, Anne; Cornelius, Claire; Davis, Todd        |
| A/Turkey/Germany/R617/2007_H6N2                      | EPI317612                      |                                | Germany  | 2007*           | Friedrich-Loeffler-Institut                         | Friedrich-Loeffler-Institut                                                 | -                                                                                                                                                                             |
| A/Wild_goose/Germany-BB/R2329/2008_H6N2              | EPI397608                      | EPI397607                      | Germany  | 2008*           | -                                                   | Friedrich-Loeffler-Institut                                                 | -                                                                                                                                                                             |
| A/Environment/North_Carolina/NWRC183941-06/2006_H6N5 | EPI406114                      |                                | USA      | 2006*           | -                                                   | Other database import                                                       | Anderson, T.; Piaggio, T.                                                                                                                                                     |
| A/Sentinel_mallard/Germany/Sum156/2007_H6N5          | EPI397610                      | EPI397609                      | Germany  | 2007*           | -                                                   | Friedrich-Loeffler-Institut                                                 | -                                                                                                                                                                             |
| A/Duck/Germany-NW/R2185/2006_H6N8                    | EPI397606                      |                                | Germany  | 2006*           | -                                                   | Friedrich-Loeffler-Institut                                                 | -                                                                                                                                                                             |
| A/Environment/California/NWRC183200-06/2006_H6N8     | EPI406098                      |                                | USA      | 2006*           | -                                                   | Other database import                                                       | Anderson, T.; Piaggio, T.                                                                                                                                                     |
| A/Goose/Germany/R1767/2007_H6N8                      | EPI416259                      |                                | Germany  | 2007*           | -                                                   | Friedrich-Loeffler-Institut                                                 | -                                                                                                                                                                             |
| A/Mallard/Germany-BY/R1353/2010_H6N8                 | EPI339180                      |                                | Germany  | 2010*           | -                                                   | Friedrich-Loeffler-Institut                                                 | -                                                                                                                                                                             |
| A/Mule_duck/Bulgaria/365/2010_H6N8                   | EPI574207                      |                                | Bulgaria | 9-Mar-2010      | -                                                   | Other database import                                                       | Marinova-Petkova, A.; Georgiev, G.; Petkov, T.; Darnell, D.; Franks, J.; Walker, D.; Seiler, P.; Danner, A.; Graham, A.; McKenzie, P.; Krauss, S.; Webby, R.J.; Webster, R.G. |
| A/Mute_swan/Germany/R2927/2007_H6N8                  | EPI185339                      |                                | Germany  | 2007*           | -                                                   | Friedrich-Loeffler-Institut                                                 | -                                                                                                                                                                             |

| Isolate name                                                                                                                          | Accession number<br>HA segment    | Accession number<br>NA segment      | Country                             | Collection Date                         | Originating Laboratory                                                                                | Submitting Laboratory                                                                                      | Authors                                                                                                                                                                                                                                                                                                                                                                                                                                                                                                          |
|---------------------------------------------------------------------------------------------------------------------------------------|-----------------------------------|-------------------------------------|-------------------------------------|-----------------------------------------|-------------------------------------------------------------------------------------------------------|------------------------------------------------------------------------------------------------------------|------------------------------------------------------------------------------------------------------------------------------------------------------------------------------------------------------------------------------------------------------------------------------------------------------------------------------------------------------------------------------------------------------------------------------------------------------------------------------------------------------------------|
| A/Pink-footed_goose/Iceland/0987/2011_H6N8                                                                                            | EPI476116                         |                                     | Iceland                             | 1-Nov-2011                              | -                                                                                                     | Other database import                                                                                      | Wentworth,D.E.; Halpin,R.A.; Lin,X.; Bera,J.; Akopov,A.; Ransier,A.; Mohan,M.; Fedorova,N.; Tsitrin,T.; Stockwell,T.; Amedeo,P.; Appalla,L.; Bishop,B.; Edworthy,P.; Gupta,N.; Hoover,J.; Katzell,D.; Li,K.; Schobel,S.; Shrivastava,S.; Thovarai,V.; Wang,S.; Bao,Y.; Sanders,R.; Zhdanov,S.; Kirvutin,B.; Lioman,D.J.; Tatusova,T.; Hal,J.S.; Marinove-Petkova,A.; Georgiev,G.; Petkov,T.; Darnell,D.; Franks,J.; Walker,D.; Seiler,P.; Danner,A.; Graham,A.; McKenzie,P.; Krauss,S.; Webby,R.J.; Webster,R.G. |
| A/Mule_duck/Bulgaria/175/2009_H6                                                                                                      | EPI574252                         |                                     | Bulgaria                            | 12-Jan-2009                             | -                                                                                                     | Other database import                                                                                      | Marinove-Petkova,A.; Georgiev,G.; Petkov,T.; Darnell,D.; Franks,J.; Walker,D.; Seiler,P.; Danner,A.; Graham,A.; McKenzie,P.; Krauss,S.; Webby,R.J.; Webster,R.G.                                                                                                                                                                                                                                                                                                                                                 |
| A/Mule_duck/Bulgaria/181/2010_H6                                                                                                      | EPI574247                         |                                     | Bulgaria                            | 11-Feb-2010                             | -                                                                                                     | Other database import                                                                                      | Marinove-Petkova,A.; Georgiev,G.; Petkov,T.; Darnell,D.; Franks,J.; Walker,D.; Seiler,P.; Danner,A.; Graham,A.; McKenzie,P.; Krauss,S.; Webby,R.J.; Webster,R.G.                                                                                                                                                                                                                                                                                                                                                 |
| A/Chicken/Netherlands/11004875/2011_H7N1<br>A/Duck/Turkey/55/Cetinkaya/49/2006_H7N1                                                   | pending<br>EPI346007              | EPI316304                           | Netherlands<br>Turkey               | 22-Apr-2011<br>2-Mar-2006               | Central Veterinary Institute<br>Pendik Veterinary Control and Research Institute                      | Central Veterinary Institute<br>Animal and Plant Health Agency (APHA)                                      | Heutink R., S. Pritz-Verschuren and G.Koch<br>Collins,S; Russell,C; Focosi-Snyman,R; Essen,S; Shell,W; Akcadag,B; Iyisan,S; Unsal Baca,A; Reid,S; Manvell,R; Banks,J                                                                                                                                                                                                                                                                                                                                             |
| A/Guinea_fowl/Italy/407/2008_H7N1                                                                                                     | EPI210104                         |                                     | Italy                               | 2008*                                   | Istituto Zooprofilattico Sperimentale Delle Venezia                                                   | Istituto Zooprofilattico Sperimentale Delle Venezia                                                        | -                                                                                                                                                                                                                                                                                                                                                                                                                                                                                                                |
| A/Mallard/Denmark/58-62-KLSV-119/09_H7N1                                                                                              | EPI492308                         |                                     | Denmark                             | 21-Oct-2009                             | National Veterinary Institute                                                                         | Animal and Plant Health Agency (APHA)                                                                      | Barrass,L; Russell,C; Shell,W; Manvell,R; Jorgensen,P; Reid,S                                                                                                                                                                                                                                                                                                                                                                                                                                                    |
| A/Mallard/Italy/3397-65/2008_H7N1                                                                                                     | EPI167297                         |                                     | Italy                               | 2008*                                   | -                                                                                                     | Istituto Zooprofilattico Sperimentale Delle Venezia                                                        | -                                                                                                                                                                                                                                                                                                                                                                                                                                                                                                                |
| A/Mallard/Italy/6103-5/2007_H7N1                                                                                                      | EPI167296                         |                                     | Italy                               | 2007*                                   | -                                                                                                     | Istituto Zooprofilattico Sperimentale Delle Venezia                                                        | -                                                                                                                                                                                                                                                                                                                                                                                                                                                                                                                |
| A/Mallard/Italy/731/09_H7N1                                                                                                           | EPI492522                         |                                     | Italy                               | 7-Jan-2009                              | Istituto Zooprofilattico Sperimentale Delle Venezia                                                   | Animal and Plant Health Agency (APHA)                                                                      | Agyeman-Dua,E; Russell,C; Shell,W; Manvell,R; Terregino,C; Reid,S                                                                                                                                                                                                                                                                                                                                                                                                                                                |
| A/Mallard/Italy/794-18/2008_H7N1                                                                                                      | EPI167299                         |                                     | Italy                               | 2008*                                   | -                                                                                                     | Istituto Zooprofilattico Sperimentale Delle Venezia                                                        | -                                                                                                                                                                                                                                                                                                                                                                                                                                                                                                                |
| A/Shoveler/Egypt/00597-NAMRU3/2004_H7N1                                                                                               | EPI372283                         | EPI372282                           | Egypt                               | 27-Jan-2004                             | U.S. Naval Medical Research Unit No.3                                                                 | Centers for Disease Control and Prevention                                                                 | Gerloff, Nancy; Simpson, Natosha; Jones, Joyce; Kis, Zoltan; Bahgat, Verina; Soliman,Atef; Elassal, Emad; Ahmed, Lu'ay; Gaynor, Anne; Cornelius, Claire; Davis,Todd                                                                                                                                                                                                                                                                                                                                              |
| A/Shoveler/Egypt/14879-NAMRU3/2006_H7N1                                                                                               | EPI372363                         | EPI372362                           | Egypt                               | 22-Dec-2006                             | U.S. Naval Medical Research Unit No.3                                                                 | Centers for Disease Control and Prevention                                                                 | Gerloff, Nancy; Simpson, Natosha; Jones, Joyce; Kis, Zoltan; Bahgat, Verina; Soliman,Atef; Elassal, Emad; Ahmed, Lu'ay; Gaynor, Anne; Cornelius, Claire; Davis,Todd                                                                                                                                                                                                                                                                                                                                              |
| A/Tadorna_tadorna/Belgium/3441-P3/2009_H7N1                                                                                           | EPI360900                         | EPI360901                           | Belgium                             | 21-Mar-2009                             | Veterinary and Agrochemical Research Institute                                                        | Veterinary and Agrochemical Research Institute                                                             | -                                                                                                                                                                                                                                                                                                                                                                                                                                                                                                                |
| A/Teal/Italy/794-3/2008_H7N1                                                                                                          | EPI167298                         |                                     | Italy                               | 2008*                                   | -                                                                                                     | Istituto Zooprofilattico Sperimentale Delle Venezia                                                        | -                                                                                                                                                                                                                                                                                                                                                                                                                                                                                                                |
| A/Chicken/Italy/2240/2003_H7N3                                                                                                        | EPI154960                         |                                     | Italy                               | 2003*                                   | -                                                                                                     | Istituto Zooprofilattico Sperimentale Delle Venezia                                                        | Fusaro, A.; Tassoni, L.; Milani, A.; Salviato, A.; Schivo, A.; Monne, I.; Cattoli, G.                                                                                                                                                                                                                                                                                                                                                                                                                            |
| A/Chicken/Italy/2837-54/2007_H7N3                                                                                                     | EPI154980                         |                                     | Italy                               | 2007*                                   | -                                                                                                     | Istituto Zooprofilattico Sperimentale Delle Venezia                                                        | -                                                                                                                                                                                                                                                                                                                                                                                                                                                                                                                |
| A/Chicken/Italy/2837-58/2007_H7N3                                                                                                     | EPI154981                         |                                     | Italy                               | 2007*                                   | -                                                                                                     | Istituto Zooprofilattico Sperimentale Delle Venezia                                                        | -                                                                                                                                                                                                                                                                                                                                                                                                                                                                                                                |
| A/Chicken/Italy/8093/2002_H7N3                                                                                                        | EPI154966                         |                                     | Italy                               | 2002*                                   | -                                                                                                     | Istituto Zooprofilattico Sperimentale Delle Venezia                                                        | Fusaro, A.; Tassoni, L.; Milani, A.; Salviato, A.; Schivo, A.; Monne, I.; Cattoli, G.                                                                                                                                                                                                                                                                                                                                                                                                                            |
| A/Guinea_fowl/Italy/1613/2003_H7N3                                                                                                    | EPI154959                         |                                     | Italy                               | 2003*                                   | -                                                                                                     | Istituto Zooprofilattico Sperimentale Delle Venezia                                                        | Fusaro, A.; Tassoni, L.; Milani, A.; Salviato, A.; Schivo, A.; Monne, I.; Cattoli, G.                                                                                                                                                                                                                                                                                                                                                                                                                            |
| A/Mallard/Italy/1336/07_H7N3                                                                                                          | EPI167295                         |                                     | Italy                               | 2007*                                   | -                                                                                                     | Istituto Zooprofilattico Sperimentale Delle Venezia                                                        | -                                                                                                                                                                                                                                                                                                                                                                                                                                                                                                                |
| A/Mallard/Italy/6103-12/2007_H7N3                                                                                                     | EPI154982                         |                                     | Italy                               | 2007*                                   | -                                                                                                     | Istituto Zooprofilattico Sperimentale Delle Venezia                                                        | -                                                                                                                                                                                                                                                                                                                                                                                                                                                                                                                |
| A/Mallard/Italy/6104-14/2007_H7N3                                                                                                     | EPI167300                         |                                     | Italy                               | 2007*                                   | -                                                                                                     | Istituto Zooprofilattico Sperimentale Delle Venezia                                                        | -                                                                                                                                                                                                                                                                                                                                                                                                                                                                                                                |
| A/Shoveler/Egypt/00017-NAMRU3/2007_H7N3                                                                                               | EPI372450                         |                                     | Egypt                               | 29-Dec-2006                             | U.S. Naval Medical Research Unit No.3                                                                 | Centers for Disease Control and Prevention                                                                 | Gerloff, Nancy; Simpson, Natosha; Jones, Joyce; Kis, Zoltan; Bahgat, Verina; Soliman,Atef; Elassal, Emad; Ahmed, Lu'ay; Gaynor, Anne; Cornelius, Claire; Davis,Todd                                                                                                                                                                                                                                                                                                                                              |
| A/Shoveler/Egypt/00241-NAMRU3/2007_H7N3                                                                                               | EPI372418                         |                                     | Egypt                               | 5-Jan-2007                              | U.S. Naval Medical Research Unit No.3                                                                 | Centers for Disease Control and Prevention                                                                 | Gerloff, Nancy; Simpson, Natosha; Jones, Joyce; Kis, Zoltan; Bahgat, Verina; Soliman,Atef; Elassal, Emad; Ahmed, Lu'ay; Gaynor, Anne; Cornelius, Claire; Davis,Todd                                                                                                                                                                                                                                                                                                                                              |
| A/Turkey/Italy/2963/2003_H7N3                                                                                                         | EPI243279                         |                                     | Italy                               | 23-May-2003                             | -                                                                                                     | Istituto Zooprofilattico Sperimentale Delle Venezia                                                        | -                                                                                                                                                                                                                                                                                                                                                                                                                                                                                                                |
| A/Turkey/Italy/8307/2002_H7N3                                                                                                         | EPI154967                         |                                     | Italy                               | 2002*                                   | -                                                                                                     | Istituto Zooprofilattico Sperimentale Delle Venezia                                                        | Fusaro, A.; Tassoni, L.; Milani, A.; Salviato, A.; Schivo, A.; Monne, I.; Cattoli, G.                                                                                                                                                                                                                                                                                                                                                                                                                            |
| A/Swan/Germany/R736/06_H7N4                                                                                                           | EPI492517                         |                                     | Germany                             | Mar-2003*                               | Friedrich-Loeffler-Institut                                                                           | Animal and Plant Health Agency (APHA)                                                                      | Hanna,A; Russell,C; Shell,W; Harder,T; Grund,C; Starick,E; Manvell,R                                                                                                                                                                                                                                                                                                                                                                                                                                             |
| A/Teal/Italy/11VIR-792/11_H7N6                                                                                                        | EPI492520                         |                                     | Italy                               | 31-Jan-2011                             | Istituto Zooprofilattico Sperimentale Delle Venezia                                                   | Animal and Plant Health Agency (APHA)                                                                      | Collins,S; Hanna,A; Essen,S; Focosi-Snyman,R; Manvell, R; Terregino,C; Reid,S                                                                                                                                                                                                                                                                                                                                                                                                                                    |
| A/Branta_canadensis/Belgium/13000-9-2/2010_H7N7                                                                                       | EPI360902                         |                                     | Belgium                             | 2010*                                   | Veterinary and Agrochemical Research Institute                                                        | Veterinary and Agrochemical Research Institute                                                             | -                                                                                                                                                                                                                                                                                                                                                                                                                                                                                                                |
| A/Chicken/Germany-NI/R874/2010_H7N7<br>A/Chicken/Germany/R1362/11_H7N7                                                                | EPI302178<br>EPI492511            |                                     | Germany<br>Germany                  | 2010*<br>May-2011*                      | Friedrich-Loeffler-Institut<br>Friedrich-Loeffler-Institut                                            | Friedrich-Loeffler-Institut<br>Animal and Plant Health Agency (APHA)                                       | -<br>Agyeman-Dua,E; Russell,C; Shell,W; Manvell,R; Harder,T; Grund,C; Starick,E; Fereidouni,S; Reid,S                                                                                                                                                                                                                                                                                                                                                                                                            |
| A/Chicken/Netherlands/11011326/2011_H7N7<br>A/Chicken/Netherlands/12014794/2012_H7N7<br>A/Egyptian_goose/Egypt/05588-NAMRU3/2006_H7N7 | pending<br>EPI390921<br>EPI372394 | EPI325342<br>EPI390922<br>EPI372393 | Netherlands<br>Netherlands<br>Egypt | 21-Jun-2006<br>9-Aug-2012<br>7-Apr-2006 | Central Veterinary Institute<br>Central Veterinary Institute<br>U.S. Naval Medical Research Unit No.3 | Central Veterinary Institute<br>Central Veterinary Institute<br>Centers for Disease Control and Prevention | Pritz-Verschuren, Sylvia J.; Heutink, Rene; Koch, Guus<br>Heutink,Rene; Pritz-Verschuren,Sylvia; Bouwstra,Ruth; Koch, Guus<br>Gerloff, Nancy; Simpson, Natosha; Jones, Joyce; Kis, Zoltan; Bahgat, Verina; Soliman,Atef; Elassal, Emad; Ahmed, Lu'ay; Gaynor, Anne; Cornelius, Claire; Davis,Todd                                                                                                                                                                                                                |
| A/Mallard/Denmark/303878-1S/13_H7N7                                                                                                   | EPI492307                         |                                     | Denmark                             | 26-May-2013                             | National Veterinary Institute                                                                         | Animal and Plant Health Agency (APHA)                                                                      | Puranik,A; Hanna,A; Essen,S; Focosi-Snyman,R; Manvell,R; Hjulsgaer,C; Trebbien,R; Breum,S; Larsen,L; Reid,S                                                                                                                                                                                                                                                                                                                                                                                                      |
| A/Mallard/Italy/11VIR-540/11_H7N7                                                                                                     | EPI492519                         |                                     | Italy                               | 10-Jan-2011                             | Istituto Zooprofilattico Sperimentale Delle Venezia                                                   | Animal and Plant Health Agency (APHA)                                                                      | Collins,S; Hanna,A; Essen,S; Focosi-Snyman,R; Manvell, R; Terregino,C; Reid,S                                                                                                                                                                                                                                                                                                                                                                                                                                    |

| Isolate name                                                     | Accession number<br>HA segment | Accession number<br>NA segment | Country | Collection Date | Originating Laboratory                 | Submitting Laboratory                               | Authors                                                                                                                                                                                                                                                                                                                                                                                                                                                                                                                                |
|------------------------------------------------------------------|--------------------------------|--------------------------------|---------|-----------------|----------------------------------------|-----------------------------------------------------|----------------------------------------------------------------------------------------------------------------------------------------------------------------------------------------------------------------------------------------------------------------------------------------------------------------------------------------------------------------------------------------------------------------------------------------------------------------------------------------------------------------------------------------|
| A/Mallard/Poland/01/08_H7N7                                      | EPI169422                      | EPI169423                      | Poland  | 28-Dec-2007     | National Veterinary Research Institute | National Veterinary Research Institute              | -                                                                                                                                                                                                                                                                                                                                                                                                                                                                                                                                      |
| A/Mallard/Poland/41/09_H7N7                                      | EPI211188                      |                                | Poland  | 16-Feb-2009     | National Veterinary Research Institute | National Veterinary Research Institute              | -                                                                                                                                                                                                                                                                                                                                                                                                                                                                                                                                      |
| A/Mallard/Poland/446/09_H7N7                                     | EPI254381                      | EPI254382                      | Poland  | 27-Dec-2009     | National Veterinary Research Institute | National Veterinary Research Institute              | Smietanka,K; Pikula,A; Minta,Z                                                                                                                                                                                                                                                                                                                                                                                                                                                                                                         |
| A/Pochard/Germany/R916/06_H7N7                                   | EPI492516                      |                                | Germany | Mar-2006*       | Friedrich-Loeffler-Institut            | Animal and Plant Health Agency (APHA)               | Hanna,A; Russell,C; Shell,W; Harder,T; Grund,C; Starick,E; Manvell,R                                                                                                                                                                                                                                                                                                                                                                                                                                                                   |
| A/Shoveler/Egypt/09864-NAMRU3/2004_H7N7                          | EPI372323                      | EPI372322                      | Egypt   | 22-Dec-2004     | U.S. Naval Medical Research Unit No.3  | Centers for Disease Control and Prevention          | Gerloff, Nancy; Simpson, Natoshia; Jones, Joyce; Kis, Zoltan; Bahgat, Verina; Soliman,Atef; Elassal, Emad; Ahmed, Lu'ay; Gaynor, Anne; Cornelius, Claire; Davis,Todd                                                                                                                                                                                                                                                                                                                                                                   |
| A/Swan/Germany/R57/06_H7N7                                       | EPI492518                      |                                | Germany | Jan-2006*       | Friedrich-Loeffler-Institut            | Animal and Plant Health Agency (APHA)               | Hanna,A; Russell,C; Shell,W; Harder,T; Grund,C; Starick,E; Manvell,R                                                                                                                                                                                                                                                                                                                                                                                                                                                                   |
| A/Teal/Egypt/00835-NAMRU3/2004_H7N7                              | EPI372307                      |                                | Egypt   | 18-Feb-2004     | U.S. Naval Medical Research Unit No.3  | Centers for Disease Control and Prevention          | Gerloff, Nancy; Simpson, Natoshia; Jones, Joyce; Kis, Zoltan; Bahgat, Verina; Soliman,Atef; Elassal, Emad; Ahmed, Lu'ay; Gaynor, Anne; Cornelius, Claire; Davis,Todd                                                                                                                                                                                                                                                                                                                                                                   |
| A/Turkey/Germany-NW/R655/2009_H7N7                               | EPI356351                      |                                | Germany | 2009*           | -                                      | Friedrich-Loeffler-Institut                         | -                                                                                                                                                                                                                                                                                                                                                                                                                                                                                                                                      |
| A/Shoveler/Egypt/00215-NAMRU3/2007_H7N9                          | EPI372410                      |                                | Egypt   | 5-Jan-2007      | U.S. Naval Medical Research Unit No.3  | Centers for Disease Control and Prevention          | Gerloff, Nancy; Simpson, Natoshia; Jones, Joyce; Kis, Zoltan; Bahgat, Verina; Soliman,Atef; Elassal, Emad; Ahmed, Lu'ay; Gaynor, Anne; Cornelius, Claire; Davis,Todd                                                                                                                                                                                                                                                                                                                                                                   |
| A/Chicken/Italy/13VR4527-11/2013_H7N7                            | EPI677999                      | EPI677998                      | Italy   | 13-Aug-2013     | -                                      | Istituto Zooprofilattico Sperimentale Delle Venezie | -                                                                                                                                                                                                                                                                                                                                                                                                                                                                                                                                      |
| A/Northern_shoveler/Mississippi/11055900/2011_H8N1               | EPI512596                      |                                | USA     | 8-Dec-2011      | -                                      | Other database import                               | Wentworth,D.E.; Dugan,V.; Halpin,R.; Lin,X.; Bera,J.; Ghedin,E.; Fedorova,N.; Overton,L.; Tsittrin,T.; Stockwell,T.; Amedeo,P.; Bishop,B.; Chen,H.; Edworthy,P.; Gupta,N.; Katzel,D.; Li,K.; Schobel,S.; Shrivastava,S.; Thovarai,V.; Wang,S.; Nolting,J.M.; Fries,A.C.; Bowman,A.S.; Bao,Y.; Sanders,R.; Zhdanov,S.; Kiryutin,B.; Lipman,D.J.; Tatusova,T.; Slemons,R.                                                                                                                                                                |
| A/American_black_duck/Nova_Scotia/02043/2007_H8N4                | EPI404484                      |                                | Canada  | 8-Aug-2007      | -                                      | Other database import                               | Wentworth,D.E.; Dugan,V.; Halpin,R.; Lin,X.; Bera,J.; Ghedin,E.; Fedorova,N.; Overton,L.; Tsittrin,T.; Stockwell,T.; Amedeo,P.; Bishop,B.; Chen,H.; The NIAID Influenza Genome Sequencing Consortium                                                                                                                                                                                                                                                                                                                                   |
| A/American_green-winged_teal/California/44287-373/2007_H8N4      | EPI292438                      |                                | USA     | 27-Jan-2007     | -                                      | Other database import                               | Wentworth,D.E.; Dugan,V.; Halpin,R.; Lin,X.; Bera,J.; Ghedin,E.; Fedorova,N.; Overton,L.; Tsittrin,T.; Stockwell,T.; Amedeo,P.; Bishop,B.; Chen,H.; Edworthy,P.; Gupta,N.; Katzel,D.; Li,K.; Schobel,S.; Shrivastava,S.; Thovarai,V.; Wang,S.; Runstadler,J.; Lindberg,M.; Huettmann,F.; Petruska,M.; Meixell,B.; Gingsrich,J.P.; Gildehaus,L.A.; Vick,L.; Kokx,K.; Dillon,D.; Aldehoff,F.; Felker,E.P.; Marcotte,R.W.; Schmidt,J.C.; Moore,J.R.; Gerdes,K.E.; Ran,Y.; Sanders,R.; Dornnovov,D.; Kiryutin,B.; Lipman,D.J.; Tatusova,T. |
| A/American_green-winged_teal/Interior_Alaska/9BM5045R0/2009_H8N4 | EPI433069                      | EPI433100                      | USA     | 29-Jul-2009     | -                                      | Other database import                               | Anderson,T.; Piaggio,T.                                                                                                                                                                                                                                                                                                                                                                                                                                                                                                                |
| A/Environment/Pennsylvania/NWRC182092-24/2006_H8N4               | EPI406002                      |                                | USA     | 2006*           | -                                      | Other database import                               | Centers for Disease Control and Prevention                                                                                                                                                                                                                                                                                                                                                                                                                                                                                             |
| A/Garganey/Ukraine/05835-NAMRU3/2006_H8N4                        | EPI372512                      | EPI372511                      | Ukraine | 13-Aug-2006     | U.S. Naval Medical Research Unit No.3  | Centers for Disease Control and Prevention          | Gerloff, Nancy; Simpson, Natoshia; Jones, Joyce; Kis, Zoltan; Bahgat, Verina; Soliman,Atef; Elassal, Emad; Ahmed, Lu'ay; Gaynor, Anne; Cornelius, Claire; Davis,Todd                                                                                                                                                                                                                                                                                                                                                                   |
| A/Mallard/Interior_Alaska/8BM1966R1/2008_H8N4                    | EPI299970                      |                                | USA     | 8-Aug-2008      | -                                      | Other database import                               | The NIAID Influenza Genome Sequencing Consortium                                                                                                                                                                                                                                                                                                                                                                                                                                                                                       |
| A/Mallard/Interior_Alaska/8MP0547/2008_H8N4                      | EPI299411                      |                                | USA     | 11-Aug-2008     | -                                      | Other database import                               | The NIAID Influenza Genome Sequencing Consortium                                                                                                                                                                                                                                                                                                                                                                                                                                                                                       |
| A/Mallard/Interior_Alaska/9BM10537R0/2009_H8N4                   | EPI436880                      |                                | USA     | 2009*           | -                                      | Other database import                               | Wentworth,D.E.; Dugan,V.; Halpin,R.; Lin,X.; Bera,J.; Ghedin,E.; Fedorova,N.; Overton,L.; Tsittrin,T.; Stockwell,T.; Amedeo,P.; Bishop,B.; Chen,H.;                                                                                                                                                                                                                                                                                                                                                                                    |
| A/Mallard/Interior_Alaska/9BM8389R0/2009_H8N4                    | EPI452280                      | EPI452282                      | USA     | 2009*           | -                                      | Other database import                               | -                                                                                                                                                                                                                                                                                                                                                                                                                                                                                                                                      |
| A/Mallard/Minnesota/Sg-00675/2008_H8N4                           | EPI188649                      |                                | USA     | 3-Aug-2008      | -                                      | Other database import                               | Sreevatsan,S.; Ramakrishnan,M.A.; Wang,P.; Anderson,T.L.; Jindal,N.; Chander,Y.; Goyal,S.M.; Osterholm,M.T.                                                                                                                                                                                                                                                                                                                                                                                                                            |
| A/Northern_pintail/Interior_Alaska/8BM2011R1/2008_H8N4           | EPI299978                      |                                | USA     | 9-Aug-2008      | -                                      | Other database import                               | The NIAID Influenza Genome Sequencing Consortium                                                                                                                                                                                                                                                                                                                                                                                                                                                                                       |
| A/Northern_pintail/Interior_Alaska/8BM2046R1/2008_H8N4           | EPI299419                      |                                | USA     | 9-Aug-2008      | -                                      | Other database import                               | The NIAID Influenza Genome Sequencing Consortium                                                                                                                                                                                                                                                                                                                                                                                                                                                                                       |
| A/Northern_pintail/Interior_Alaska/8BM2621R1/2008_H8N4           | EPI299686                      |                                | USA     | 14-Aug-2008     | -                                      | Other database import                               | The NIAID Influenza Genome Sequencing Consortium                                                                                                                                                                                                                                                                                                                                                                                                                                                                                       |
| A/Northern_pintail/Interior_Alaska/8BM2987/2008_H8N4             | EPI299122                      |                                | USA     | 17-Aug-2008     | -                                      | Other database import                               | The NIAID Influenza Genome Sequencing Consortium                                                                                                                                                                                                                                                                                                                                                                                                                                                                                       |
| A/Northern_pintail/Interior_Alaska/8BM3088/2008_H8N4             | EPI299146                      |                                | USA     | 18-Aug-2008     | -                                      | Other database import                               | The NIAID Influenza Genome Sequencing Consortium                                                                                                                                                                                                                                                                                                                                                                                                                                                                                       |
| A/Northern_pintail/Interior_Alaska/8BM3091/2008_H8N4             | EPI299694                      |                                | USA     | 18-Aug-2008     | -                                      | Other database import                               | The NIAID Influenza Genome Sequencing Consortium                                                                                                                                                                                                                                                                                                                                                                                                                                                                                       |
| A/Northern_pintail/Interior_Alaska/8BM3137/2008_H8N4             | EPI299702                      |                                | USA     | 18-Aug-2008     | -                                      | Other database import                               | The NIAID Influenza Genome Sequencing Consortium                                                                                                                                                                                                                                                                                                                                                                                                                                                                                       |
| A/Northern_pintail/Interior_Alaska/8MP0689/2008_H8N4             | EPI299090                      |                                | USA     | 13-Aug-2008     | -                                      | Other database import                               | The NIAID Influenza Genome Sequencing Consortium                                                                                                                                                                                                                                                                                                                                                                                                                                                                                       |
| A/Northern_pintail/Interior_Alaska/9BM11556R0/2009_H8N4          | EPI452128                      |                                | USA     | 2009*           | -                                      | Other database import                               | Wentworth,D.E.; Dugan,V.; Halpin,R.; Lin,X.; Bera,J.; Ghedin,E.; Fedorova,N.; Overton,L.; Tsittrin,T.; Stockwell,T.; Amedeo,P.; Bishop,B.; Chen,H.;                                                                                                                                                                                                                                                                                                                                                                                    |
| A/Northern_pintail/Interior_Alaska/9BM11643R0/2009_H8N4          | EPI452142                      | EPI452144                      | USA     | 2009*           | -                                      | Other database import                               | Wentworth,D.E.; Dugan,V.; Halpin,R.; Lin,X.; Bera,J.; Ghedin,E.; Fedorova,N.; Overton,L.; Tsittrin,T.; Stockwell,T.; Amedeo,P.; Bishop,B.; Chen,H.;                                                                                                                                                                                                                                                                                                                                                                                    |
| A/Northern_pintail/Interior_Alaska/9BM6510R0/2009_H8N4           | EPI452001                      | EPI452003                      | USA     | 2009*           | -                                      | Other database import                               | Wentworth,D.E.; Dugan,V.; Halpin,R.; Lin,X.; Bera,J.; Ghedin,E.; Fedorova,N.; Overton,L.; Tsittrin,T.; Stockwell,T.; Amedeo,P.; Bishop,B.; Chen,H.;                                                                                                                                                                                                                                                                                                                                                                                    |
| A/Northern_pintail/Interior_Alaska/9BM7152R2/2009_H8N4           | EPI452015                      | EPI452017                      | USA     | 2009*           | -                                      | Other database import                               | Wentworth,D.E.; Dugan,V.; Halpin,R.; Lin,X.; Bera,J.; Ghedin,E.; Fedorova,N.; Overton,L.; Tsittrin,T.; Stockwell,T.; Amedeo,P.; Bishop,B.; Chen,H.;                                                                                                                                                                                                                                                                                                                                                                                    |
| A/Northern_pintail/Interior_Alaska/9BM7240R0/2009_H8N4           | EPI452050                      |                                | USA     | 2009*           | -                                      | Other database import                               | Wentworth,D.E.; Dugan,V.; Halpin,R.; Lin,X.; Bera,J.; Ghedin,E.; Fedorova,N.; Overton,L.; Tsittrin,T.; Stockwell,T.; Amedeo,P.; Bishop,B.; Chen,H.;                                                                                                                                                                                                                                                                                                                                                                                    |
| A/Northern_pintail/Interior_Alaska/9BM7882R0/2009_H8N4           | EPI452219                      |                                | USA     | 2009*           | -                                      | Other database import                               | Wentworth,D.E.; Dugan,V.; Halpin,R.; Lin,X.; Bera,J.; Ghedin,E.; Fedorova,N.; Overton,L.; Tsittrin,T.; Stockwell,T.; Amedeo,P.; Bishop,B.; Chen,H.;                                                                                                                                                                                                                                                                                                                                                                                    |
| A/Northern_pintail/Interior_Alaska/9BM8109R0/2009_H8N4           | EPI436940                      |                                | USA     | 2009*           | -                                      | Other database import                               | Wentworth,D.E.; Dugan,V.; Halpin,R.; Lin,X.; Bera,J.; Ghedin,E.; Fedorova,N.; Overton,L.; Tsittrin,T.; Stockwell,T.; Amedeo,P.; Bishop,B.; Chen,H.;                                                                                                                                                                                                                                                                                                                                                                                    |
| A/Northern_pintail/Interior_Alaska/9BM8237R0/2009_H8N4           | EPI452226                      |                                | USA     | 2009*           | -                                      | Other database import                               | Wentworth,D.E.; Dugan,V.; Halpin,R.; Lin,X.; Bera,J.; Ghedin,E.; Fedorova,N.; Overton,L.; Tsittrin,T.; Stockwell,T.; Amedeo,P.; Bishop,B.; Chen,H.;                                                                                                                                                                                                                                                                                                                                                                                    |
| A/Northern_pintail/Interior_Alaska/9BM8967R0/2009_H8N4           | EPI436976                      |                                | USA     | 2009*           | -                                      | Other database import                               | Wentworth,D.E.; Dugan,V.; Halpin,R.; Lin,X.; Bera,J.; Ghedin,E.; Fedorova,N.; Overton,L.; Tsittrin,T.; Stockwell,T.; Amedeo,P.; Bishop,B.; Chen,H.;                                                                                                                                                                                                                                                                                                                                                                                    |
| A/Northern_shoveler/California/AKS273/2007_H8N4                  | EPI178742                      |                                | USA     | 1-Dec-2007      | -                                      | Other database import                               | -                                                                                                                                                                                                                                                                                                                                                                                                                                                                                                                                      |

| Isolate name                                            | Accession number<br>HA segment | Accession number<br>NA segment | Country  | Collection Date | Originating Laboratory                | Submitting Laboratory                                   | Authors                                                                                                                                                                                                                                                                                                                                                                         |
|---------------------------------------------------------|--------------------------------|--------------------------------|----------|-----------------|---------------------------------------|---------------------------------------------------------|---------------------------------------------------------------------------------------------------------------------------------------------------------------------------------------------------------------------------------------------------------------------------------------------------------------------------------------------------------------------------------|
| A/Northern_shoveler/California/HKWF1203/2007_H8N4       | EPI222411                      |                                | USA      | 5-Dec-2007      | -                                     | Other database import                                   | Cardona,C.; Boyce,W.M.; Nelson,J.; Anchell,N.; Dao,N.; Anunciacion,J.; Cai,H.; Green,L.; Detter,C.; Kiss,H.; Dannen,M.                                                                                                                                                                                                                                                          |
| A/Northern_shoveler/California/HKWF1204/2007_H8N4       | EPI178782                      |                                | USA      | 5-Dec-2007      | -                                     | Other database import                                   | -                                                                                                                                                                                                                                                                                                                                                                               |
| A/Northern_shoveler/California/HKWF1325/2007_H8N4       | EPI160322                      |                                | USA      | 9-Dec-2007      | -                                     | Other database import                                   | -                                                                                                                                                                                                                                                                                                                                                                               |
| A/Northern_shoveler/Interior_Alaska/9BM2925R0/2009_H8N4 | EPI432837                      |                                | USA      | 16-Jul-2009     | -                                     | Other database import                                   | Wentworth,D.E.; Dugan,V.; Halpin,R.; Lin,X.; Bera,J.; Ghedin,E.; Fedorova,N.; Overton,L.; Tsitrin,T.; Stockwell,T.; Amedeo,P.; Bishop,B.; Chen,H.;                                                                                                                                                                                                                              |
| A/Northern_shoveler/Minnesota/Sg-00648/2008_H8N4        | EPI449391                      |                                | USA      | 1-Aug-2008      | -                                     | Other database import                                   | Wentworth,D.E.; Dugan,V.; Halpin,R.; Lin,X.; Bera,J.; Wester,E.; Ghedin,E.; Fedorova,N.; Tsitrin,T.; Stockwell,T.; Amedeo,P.; Bishop,B.; Edworthy,P.; Gupta,N.; Katzel,D.; Li,K.; Schobel,S.; Shrivastava,S.; Thovarai,V.; Wang,S.; Lebarbenchon,C.; Sreevatsan,S.; Poulson,B.; Yang,M.; Stallknecht,D.; Bao,Y.; Sanders,R.; Dernovoy,D.; Kiryutin,B.;                          |
| A/Teal/Northern_Ireland/14567-10-5257/2007_H9N1         | EPI383878                      |                                | Ireland  | 2007*           | -                                     | Other database import                                   | Linman,D.J.; Tatusova,T. Slomka,M.J.; Hanna,A.; Mahmood,S.; Govil,J.; Krill,D.; Manvell,R.J.; Shell,W.; Arnold,M.E.; Banks,J.; Brown,I.H.                                                                                                                                                                                                                                       |
| A/Common_coot/Poland/88/13_H9N2                         | EPI505111                      |                                | Poland   | 22-Sep-2013     | -                                     | National Veterinary Research Institut Poland, PIWet-PIB | -                                                                                                                                                                                                                                                                                                                                                                               |
| A/Mallard/Iran/C364/2007_H9N2                           | EPI302559                      |                                | Iran     | 2007*           | -                                     | Other database import                                   | Fereidouni,SR.                                                                                                                                                                                                                                                                                                                                                                  |
| A/Turkey/England/13437/2013_H9N2                        | EPI585514                      |                                | England  | 14-Apr-2013     | Animal and Plant Health Agency (APHA) | Animal and Plant Health Agency (APHA)                   | Reid, SM; Banks, J; Ceeraz, V; Cox, WJ; Howard, WA; Puranik, A; Collins, S; Seekings, A; Manvell, R; Irvine, RM; Brown, IH                                                                                                                                                                                                                                                      |
| A/Turkey/England/13538/2013_H9N2                        | EPI585519                      |                                | England  | 14-Apr-2013     | Animal and Plant Health Agency (APHA) | Animal and Plant Health Agency (APHA)                   | Reid, SM; Banks, J; Ceeraz, V; Cox, WJ; Howard, WA; Puranik, A; Collins, S; Seekings, A; Manvell, R; Irvine, RM; Brown, IH                                                                                                                                                                                                                                                      |
| A/Turkey/Poland/14/13_H9N2                              | EPI500817                      |                                | Poland   | 23-Apr-2013     | -                                     | National Veterinary Research Institut Poland, PIWet-PIB | -                                                                                                                                                                                                                                                                                                                                                                               |
| A/Turkey/Poland/20/13_H9N2                              | EPI505105                      |                                | Poland   | 15-May-2013     | -                                     | National Veterinary Research Institut Poland, PIWet-PIB | -                                                                                                                                                                                                                                                                                                                                                                               |
| A/Ruddy_turnstone/New_Jersey/AI03-128/2003_H9N7         | EPI454831                      |                                | USA      | 21-May-2003     | -                                     | Other database import                                   | Wentworth,D.E.; Dugan,V.; Halpin,R.; Lin,X.; Bera,J.; Wester,E.; Ghedin,E.; Fedorova,N.; Tsitrin,T.; Stockwell,T.; Amedeo,P.; Bishop,B.; Edworthy,P.; Gupta,N.; Katzel,D.; Li,K.; Schobel,S.; Shrivastava,S.; Thovarai,V.; Wang,S.; Lebarbenchon,C.; Sreevatsan,S.; Poulson,B.; Yang,M.; Stallknecht,D.; Bao,Y.; Sanders,R.; Dernovoy,D.; Kiryutin,B.;                          |
| A/Ruddy_turnstone/New_Jersey/AI03-444/2003_H9N9         | EPI454810                      |                                | USA      | 20-May-2003     | -                                     | Other database import                                   | Linman,D.J.; Tatusova,T. Wentworth,D.E.; Dugan,V.; Halpin,R.; Lin,X.; Bera,J.; Wester,E.; Ghedin,E.; Fedorova,N.; Tsitrin,T.; Stockwell,T.; Amedeo,P.; Bishop,B.; Edworthy,P.; Gupta,N.; Katzel,D.; Li,K.; Schobel,S.; Shrivastava,S.; Thovarai,V.; Wang,S.; Lebarbenchon,C.; Sreevatsan,S.; Poulson,B.; Yang,M.; Stallknecht,D.; Bao,Y.; Sanders,R.; Dernovoy,D.; Kiryutin,B.; |
| A/Duck/Tsukuba/574/2006_H10N1                           | EPI356629                      |                                | Japan    | 2006*           | -                                     | Other database import                                   | Lioman,D.J.; Tatusova,T. Tsukamoto,K.; Javier,P.; Shishido,M.; Noguchi,D.; Pearce,J.; Kang,H.; Jeong,O.; Lee,Y.; Nakanishi,K.; Ashizawa,T.                                                                                                                                                                                                                                      |
| A/Shoveler/Egypt/00006-NAMRU3/2007_H10N1                | EPI372442                      |                                | Egypt    | 29-Dec-2006     | U.S. Naval Medical Research Unit No.3 | Centers for Disease Control and Prevention              | Gerloff, Nancy; Simpson, Natosha; Jones, Joyce; Kis, Zoltan; Bahgat, Verina; Soliman,Atef; Elassal, Emad; Ahmed, Lu'ay; Gaynor, Anne; Corneliu, Claire; Davis, Todd                                                                                                                                                                                                             |
| A/Teal/Egypt/12908-NAMRU3/2005_H10N1                    | EPI372481                      | EPI372480                      | Egypt    | 21-Nov-2005     | U.S. Naval Medical Research Unit No.3 | Centers for Disease Control and Prevention              | Gerloff, Nancy; Simpson, Natosha; Jones, Joyce; Kis, Zoltan; Bahgat, Verina; Soliman,Atef; Elassal, Emad; Ahmed, Lu'ay; Gaynor, Anne; Corneliu, Claire; Davis, Todd                                                                                                                                                                                                             |
| A/Wild_bird/Korea/A323/2009_H10N1                       | EPI387876                      |                                | Korea    | Nov-2009*       | -                                     | Other database import                                   | Kim,H.R.; Lee,Y.J.; Oem,J.K.; Bae,Y.C.; Kang,M.S.; Kang,H.M.; Choi,J.G.; Park,C.K.; Kwon,Y.K.                                                                                                                                                                                                                                                                                   |
| A/Duck/Hokkaido/W87/2007_H10N2                          | EPI161527                      |                                | Japan    | 2007*           | -                                     | Other database import                                   | -                                                                                                                                                                                                                                                                                                                                                                               |
| A/Duck/Hunan/S11205/2012_H10N3                          | EPI461563                      |                                | China    | 25-Mar-2012     | -                                     | Other database import                                   | Deng,G.; Tan,D.; Shi,J.; Cui,P.; Jiang,Y.; Liu,L.; Tian,G.; Kawaoka,Y.; Li,C.; Chen,H.                                                                                                                                                                                                                                                                                          |
| A/Duck/Thailand/LM-CU4747/2009_H10N3                    | EPI314742                      |                                | Thailand | 11-2009*        | -                                     | Other database import                                   | Amonsin,A.; Lapkuntod,J.; Suradhat,S.; Tantilertcharoen,R.; Bunpapong,N.; Boonyapisitsopa,S.; Wongphatcharachai,M.; Wisedchanwet,T.; Poovorawan,Y.; Sasireevaian,J.; Thanawongnuwech,R.                                                                                                                                                                                         |
| A/Duck/Thailand/LM-CU4753/2009_H10N3                    | EPI314746                      |                                | Thailand | 11-2009*        | -                                     | Other database import                                   | Amonsin,A.; Lapkuntod,J.; Suradhat,S.; Tantilertcharoen,R.; Bunpapong,N.; Boonyapisitsopa,S.; Wongphatcharachai,M.; Wisedchanwet,T.; Poovorawan,Y.; Sasireevaian,J.; Thanawongnuwech,R.                                                                                                                                                                                         |
| A/Muscovy_duck/Thailand/CU-LM4754/2009_H10N3            | EPI256770                      |                                | Thailand | 11-2009*        | -                                     | Other database import                                   | Amonsin,A.                                                                                                                                                                                                                                                                                                                                                                      |
| A/Duck/Italy/268302/2004_H10N4                          | EPI178493                      | EPI178495                      | Italy    | 2004*           | -                                     | Other database import                                   | Istituto Zooprofilattico Sperimentale della Lombardia e dell'Emilia                                                                                                                                                                                                                                                                                                             |
| A/Pied_avocet/Ukraine/05848-NAMRU3/2006_H10N4           | EPI372496                      | EPI372495                      | Ukraine  | 1-May-2006      | U.S. Naval Medical Research Unit No.3 | Centers for Disease Control and Prevention              | Gerloff, Nancy; Simpson, Natosha; Jones, Joyce; Kis, Zoltan; Bahgat, Verina; Soliman,Atef; Elassal, Emad; Ahmed, Lu'ay; Gaynor, Anne; Corneliu, Claire; Davis, Todd                                                                                                                                                                                                             |
| A/Shoveler/Egypt/01574-NAMRU3/2007_H10N4                | EPI372458                      | EPI372457                      | Egypt    | 9-Feb-2007      | U.S. Naval Medical Research Unit No.3 | Centers for Disease Control and Prevention              | Gerloff, Nancy; Simpson, Natosha; Jones, Joyce; Kis, Zoltan; Bahgat, Verina; Soliman,Atef; Elassal, Emad; Ahmed, Lu'ay; Gaynor, Anne; Corneliu, Claire; Davis, Todd                                                                                                                                                                                                             |
| A/Long-tailed_duck/Wisconsin/10053919/2010_H10N6        | EPI419336                      |                                | USA      | 16-Nov-2010     | -                                     | Other database import                                   | Wentworth,D.E.; Dugan,V.; Halpin,R.; Lin,X.; Bera,J.; Wester,E.; Ghedin,E.; Fedorova,N.; Tsitrin,T.; Stockwell,T.; Amedeo,P.; Bishop,B.; Edworthy,P.; Gupta,N.; Katzel,D.; Li,K.; Schobel,S.; Shrivastava,S.; Thovarai,V.; Wang,S.; Lebarbenchon,C.; Sreevatsan,S.; Poulson,B.; Yang,M.; Stallknecht,D.; Bao,Y.; Sanders,R.; Dernovoy,D.; Kiryutin,B.;                          |
| A/Mallard/Denmark/16109-4/2011-11-14_H10N6              | EPI541472                      |                                | Denmark  | 14-Nov-2011     | Technical University of Denmark       | Technical University of Denmark                         | Linman,D.J.; Tatusova,T. Hjulsgaer, Charlotte; Breum, Solvej; Trebbien, Ramona; Larsen, Lars E                                                                                                                                                                                                                                                                                  |
| A/Anas_platyrhynchos/Camargue/091863/09_H10N7           | EPI332944                      | EPI332955                      | France   | 20-May-2009     | Station Biologique "Tour du Valat"    | Institut Pasteur                                        | VITTECOQ Marion, GRANDHOMME Viviane                                                                                                                                                                                                                                                                                                                                             |
| A/Avian/Israel/232/2001_H10N7                           | EPI456969                      |                                | Israel   | Feb-2001*       | -                                     | Other database import                                   | Shkoda,J.; Panshin,A.; Shihmanter,E.; Lapin,K.; Lipkind,M.                                                                                                                                                                                                                                                                                                                      |
| A/Duck/Italy/62330/2006_H10N7                           | EPI178528                      |                                | Italy    | 2006*           | -                                     | Other database import                                   | -                                                                                                                                                                                                                                                                                                                                                                               |
| A/Duck/Italy/73383/2006_H10N7                           | EPI174777                      |                                | Italy    | 2006*           | -                                     | Other database import                                   | Istituto Zooprofilattico Sperimentale Delle Venezia                                                                                                                                                                                                                                                                                                                             |
| A/Harbor_seal/Denmark/14-5061-1lu/2014-07_H10N7         | EPI541474                      |                                | Denmark  | Jul-2014*       | Technical University of Denmark       | Technical University of Denmark                         | Krog, Jesper Schak; Hjulsgaer, Charlotte; Larsen, Lars E                                                                                                                                                                                                                                                                                                                        |
| A/Mallard/Egypt/EMC-4/2012_H10N7                        | EPI552755                      |                                | Egypt    | 9-Mar-2012      | Erasmus Medical Center                | Erasmus Medical Center                                  | Bodewes, Rogier; Bestebroer, Theo M.; Van der Vries, Erhard; Verhagen, Josanne H.; Koopmans, Marion P.; Fouchier, Ron A.M.; Wohlsein, Peter; Siebert, Ursula; Baumgärtner, Wolfgaang; Osterhaus, Albert D.M.E.                                                                                                                                                                  |

| Isolate name                                     | Accession number<br>HA segment | Accession number<br>NA segment | Country         | Collection Date | Originating Laboratory                              | Submitting Laboratory                               | Authors                                                                                                                                                                                                                                                                                                                   |
|--------------------------------------------------|--------------------------------|--------------------------------|-----------------|-----------------|-----------------------------------------------------|-----------------------------------------------------|---------------------------------------------------------------------------------------------------------------------------------------------------------------------------------------------------------------------------------------------------------------------------------------------------------------------------|
| A/Mallard/Netherlands/1/2012_H10N7               | EPI552756                      |                                | Netherlands     | 14-Jan-2012     | Erasmus Medical Center                              | Erasmus Medical Center                              | Bodewes, Rogier; Bestebroer, Theo M.; Van der Vries, Erhard; Verhagen, Josanne H.; Koopmans, Marion P.; Fouchier, Ron A.M.; Wohlsein, Peter; Siebert, Ursula; Baumgärtner, Wolfgang; Osterhaus, Albert D.M.E.                                                                                                             |
| A/Mallard/Netherlands/1/2014_H10N7               | EPI552751                      |                                | Netherlands     | 17-Feb-2014     | Erasmus Medical Center                              | Erasmus Medical Center                              | Bodewes, Rogier; Bestebroer, Theo M.; Van der Vries, Erhard; Verhagen, Josanne H.; Koopmans, Marion P.; Fouchier, Ron A.M.; Wohlsein, Peter; Siebert, Ursula; Baumgärtner, Wolfgang; Osterhaus, Albert D.M.E.                                                                                                             |
| A/Northern_paintail/Egypt/EMC-1/2012_H10N7       | EPI552754                      |                                | Egypt           | 20-Jan-2012     | Erasmus Medical Center                              | Erasmus Medical Center                              | Bodewes, Rogier; Bestebroer, Theo M.; Van der Vries, Erhard; Verhagen, Josanne H.; Koopmans, Marion P.; Fouchier, Ron A.M.; Wohlsein, Peter; Siebert, Ursula; Baumgärtner, Wolfgang; Osterhaus, Albert D.M.E.                                                                                                             |
| A/Seal/Sweden/SVA0546/2014_H10N7                 | EPI545212                      |                                | Sweden          | 16-Apr-2014     | Swedish Museum of Natural History                   | National Veterinary Institute                       | Siamak,Zohari; Aleksija,Neimanis; Tero,Härkönen; Charlotta,Moraesus; Jean-Francois,Vallachare                                                                                                                                                                                                                             |
| A/Shoveler/Egypt/00600-NAMRU3/2004_H10N7         | EPI372291                      |                                | Egypt           | 27-Jan-2004     | U.S. Naval Medical Research Unit No.3               | Centers for Disease Control and Prevention          | Gerloff, Nancy; Simpson, Natosha; Jones, Joyce; Kis, Zoltan; Bahgat, Verina; Soliman,Atef; Ellassal, Emad; Ahmed, Lu'ay; Gaynor, Anne; Cornelius, Claire; Davis,Todd                                                                                                                                                      |
| A/Shoveler/Egypt/01198-NAMRU3/2007_H10N7         | EPI372402                      |                                | Egypt           | 19-Jan-2007     | U.S. Naval Medical Research Unit No.3               | Centers for Disease Control and Prevention          | Gerloff, Nancy; Simpson, Natosha; Jones, Joyce; Kis, Zoltan; Bahgat, Verina; Soliman,Atef; Ellassal, Emad; Ahmed, Lu'ay; Gaynor, Anne; Cornelius, Claire; Davis,Todd                                                                                                                                                      |
| A/Shoveler/Egypt/09781-NAMRU3/2004_H10N7         | EPI372339                      | EPI372338                      | Egypt           | 18-Dec-2004     | U.S. Naval Medical Research Unit No.3               | Centers for Disease Control and Prevention          | Gerloff, Nancy; Simpson, Natosha; Jones, Joyce; Kis, Zoltan; Bahgat, Verina; Soliman,Atef; Ellassal, Emad; Ahmed, Lu'ay; Gaynor, Anne; Cornelius, Claire; Davis,Todd                                                                                                                                                      |
| A/Teal/Egypt/01207-NAMRU3/2007_H10N7             | EPI372426                      | EPI372425                      | Egypt           | 19-Jan-2007     | U.S. Naval Medical Research Unit No.3               | Centers for Disease Control and Prevention          | Gerloff, Nancy; Simpson, Natosha; Jones, Joyce; Kis, Zoltan; Bahgat, Verina; Soliman,Atef; Ellassal, Emad; Ahmed, Lu'ay; Gaynor, Anne; Cornelius, Claire; Davis,Todd                                                                                                                                                      |
| A/Seal/Sweden/SVA0824/2014_H10N7_H10N7           | EPI547696                      |                                | Sweden          | 29-Aug-2014     | Swedish Museum of Natural History                   | National Veterinary Institute                       | Siamak,Zohari; Aleksija,Neimanis; Tero,Härkönen; Charlotta,Moraesus; Jean-Francois,Vallachare                                                                                                                                                                                                                             |
| A/Chicken/77/Jiangxi/2014_H10N8                  | EPI537463                      |                                | China           | 9-Jan-2014      | -                                                   | Tsinghua University                                 | -                                                                                                                                                                                                                                                                                                                         |
| A/Chicken/Jiangxi/102/2013_H10N8                 | EPI530542                      |                                | China           | 8-Dec-2013      | South China Agricultural University                 | South China Agricultural University                 | Wenbao,Q; Xianfeng,Zhou; Lihong,Huang; Huanan,Li; Qian,Li; Ming,Liao; Mingbin,Liu                                                                                                                                                                                                                                         |
| A/Environment/Dongting_Lake/Hunan/3-9/2007_H10N8 | EPI221966                      |                                | China           | 2007*           | -                                                   | Other database import                               | Zhang,H.; Chen, Z.                                                                                                                                                                                                                                                                                                        |
| A/Environment/Jiangxi/03366/2013_H10N8           | EPI530386                      |                                | China           | 8-Dec-2013      | WHO Chinese National Influenza Center               | WHO Chinese National Influenza Center               | Wang,Dayan; Gao,Rongbao; Yang,Lei; Zhou,Shumei; Li,Xiyang; Zhou,Jianfang; Zhu,Wenfei; Guo,Junfeng; Li,Xiaodan; Dong,Jie; Huang,Weijuan; Zhang,Ye; Dong,Libo; Zhao,Xiang; Lu,Jian; Lan,Yu; Shu,Yuelong                                                                                                                     |
| A/Environment/Jiangxi/03367/2013_H10N8           | EPI530394                      |                                | China           | 8-Dec-2013      | WHO Chinese National Influenza Center               | WHO Chinese National Influenza Center               | Wang,Dayan; Gao,Rongbao; Yang,Lei; Zhou,Shumei; Li,Xiyang; Zhou,Jianfang; Zhu,Wenfei; Guo,Junfeng; Li,Xiaodan; Dong,Jie; Huang,Weijuan; Zhang,Ye; Dong,Libo; Zhao,Xiang; Lu,Jian; Lan,Yu; Shu,Yuelong                                                                                                                     |
| A/Environment/Jiangxi/03413/2013_H10N8           | EPI530402                      |                                | China           | 11-Dec-2013     | WHO Chinese National Influenza Center               | WHO Chinese National Influenza Center               | Wang,Dayan; Gao,Rongbao; Yang,Lei; Zhou,Shumei; Li,Xiyang; Zhou,Jianfang; Zhu,Wenfei; Guo,Junfeng; Li,Xiaodan; Dong,Jie; Huang,Weijuan; Zhang,Ye; Dong,Libo; Zhao,Xiang; Lu,Jian; Lan,Yu; Shu,Yuelong                                                                                                                     |
| A/Environment/Jiangxi/03489/2013_H10N8           | EPI530410                      |                                | China           | 27-Dec-2013     | WHO Chinese National Influenza Center               | WHO Chinese National Influenza Center               | Wang,Dayan; Gao,Rongbao; Yang,Lei; Zhou,Shumei; Li,Xiyang; Zhou,Jianfang; Zhu,Wenfei; Guo,Junfeng; Li,Xiaodan; Dong,Jie; Huang,Weijuan; Zhang,Ye; Dong,Libo; Zhao,Xiang; Lu,Jian; Lan,Yu; Shu,Yuelong                                                                                                                     |
| A/Environment/Jiangxi/10615/2014_H10N8           | EPI530418                      |                                | China           | 10-Jan-2014     | WHO Chinese National Influenza Center               | WHO Chinese National Influenza Center               | Wang,Dayan; Gao,Rongbao; Yang,Lei; Zhou,Shumei; Li,Xiyang; Zhou,Jianfang; Zhu,Wenfei; Guo,Junfeng; Li,Xiaodan; Dong,Jie; Huang,Weijuan; Zhang,Ye; Dong,Libo; Zhao,Xiang; Lu,Jian; Lan,Yu; Shu,Yuelong                                                                                                                     |
| A/Environment/Jiangxi/10721/2014_H10N8           | EPI530426                      |                                | China           | 15-Jan-2014     | WHO Chinese National Influenza Center               | WHO Chinese National Influenza Center               | Wang,Dayan; Gao,Rongbao; Yang,Lei; Zhou,Shumei; Li,Xiyang; Zhou,Jianfang; Zhu,Wenfei; Guo,Junfeng; Li,Xiaodan; Dong,Jie; Huang,Weijuan; Zhang,Ye; Dong,Libo; Zhao,Xiang; Lu,Jian; Lan,Yu; Shu,Yuelong                                                                                                                     |
| A/Environment/Jiangxi/10738/2014_H10N8           | EPI530434                      |                                | China           | 14-Jan-2014     | WHO Chinese National Influenza Center               | WHO Chinese National Influenza Center               | Wang,Dayan; Gao,Rongbao; Yang,Lei; Zhou,Shumei; Li,Xiyang; Zhou,Jianfang; Zhu,Wenfei; Guo,Junfeng; Li,Xiaodan; Dong,Jie; Huang,Weijuan; Zhang,Ye; Dong,Libo; Zhao,Xiang; Lu,Jian; Lan,Yu; Shu,Yuelong                                                                                                                     |
| A/Jiangxi-Donghu/346/2013_H10N8                  | EPI497477                      |                                | China           | 4-Dec-2013      | -                                                   | WHO Chinese National Influenza Center               | Rongbao,Gao; Shumei,Zou; Xiang,Zhao; Lei,Yang; Dayan,Wang; Yuelong,Shu                                                                                                                                                                                                                                                    |
| A/Jiangxi/09037/2014_H10N8                       | EPI530450                      |                                | China           | 8-Jan-2014      | WHO Chinese National Influenza Center               | WHO Chinese National Influenza Center               | Wang,Dayan; Gao,Rongbao; Yang,Lei; Zhou,Shumei; Li,Xiyang; Zhou,Jianfang; Zhu,Wenfei; Guo,Junfeng; Li,Xiaodan; Dong,Jie; Huang,Weijuan; Zhang,Ye; Dong,Libo; Zhao,Xiang; Lu,Jian; Lan,Yu; Shu,Yuelong                                                                                                                     |
| A/Mallard/Sweden/7/2003_H10N8                    | EPI251793                      |                                | Sweden          | 24-May-2003     | -                                                   | Other database import                               | Fouchier, R.                                                                                                                                                                                                                                                                                                              |
| A/Northern_shoveler/Hong_Kong/MPC657/2006_H10N9  | EPI469806                      |                                | Hong Kong (SAR) | 2006*           | -                                                   | Other database import                               | Lam,T.T.Y.; Wang,J.; Shen,Y.; Zhou,B.; Duan,L.; Cheung,C.L.; Ma,C.; Lycett,S.J.; Leung,C.Y.H.; Chen,X.; Li,L.; Hong,W.; Chai,Y.; Zhou,L.; Liang,H.; Ou,Z.; Liu,Y.; Ferooqui,A.; Kelvin,D.J.; Poon,L.L.M.; Smith,D.K.; Pybus,O.G.; Leung,G.M.; Shu,Y.; Webster,R.G.; Webb,R.J.; Peiris,J.S.M.; Rambaut,A.; Zhu,H.; Guan,Y. |
| A/Northern_shoveler/Hong_Kong/MPE2531/2008_H10N9 | EPI469805                      |                                | Hong Kong (SAR) | 2008*           | -                                                   | Other database import                               | Lam,T.T.Y.; Wang,J.; Shen,Y.; Zhou,B.; Duan,L.; Cheung,C.L.; Ma,C.; Lycett,S.J.; Leung,C.Y.H.; Chen,X.; Li,L.; Hong,W.; Chai,Y.; Zhou,L.; Liang,H.; Ou,Z.; Liu,Y.; Ferooqui,A.; Kelvin,D.J.; Poon,L.L.M.; Smith,D.K.; Pybus,O.G.; Leung,G.M.; Shu,Y.; Webster,R.G.; Webb,R.J.; Peiris,J.S.M.; Rambaut,A.; Zhu,H.; Guan,Y. |
| A/Northern_shoveler/Hong_Kong/MPE2984/2008_H10N9 | EPI469808                      |                                | Hong Kong (SAR) | 2008*           | -                                                   | Other database import                               | Lam,T.T.Y.; Wang,J.; Shen,Y.; Zhou,B.; Duan,L.; Cheung,C.L.; Ma,C.; Lycett,S.J.; Leung,C.Y.H.; Chen,X.; Li,L.; Hong,W.; Chai,Y.; Zhou,L.; Liang,H.; Ou,Z.; Liu,Y.; Ferooqui,A.; Kelvin,D.J.; Poon,L.L.M.; Smith,D.K.; Pybus,O.G.; Leung,G.M.; Shu,Y.; Webster,R.G.; Webb,R.J.; Peiris,J.S.M.; Rambaut,A.; Zhu,H.; Guan,Y. |
| A/Shoveler/Egypt/00004-NAMRU3/2007_H10N9         | EPI372434                      |                                | Egypt           | 29-Dec-2006     | U.S. Naval Medical Research Unit No.3               | Centers for Disease Control and Prevention          | Gerloff, Nancy; Simpson, Natosha; Jones, Joyce; Kis, Zoltan; Bahgat, Verina; Soliman,Atef; Ellassal, Emad; Ahmed, Lu'ay; Gaynor, Anne; Cornelius, Claire; Davis,Todd                                                                                                                                                      |
| A/White-fronted_goose/Germany-NI/R482/09_H1N1    | EPI248525                      | EPI248524                      | Germany         | 2009*           | -                                                   | Friedrich-Loeffler-Institut                         | -                                                                                                                                                                                                                                                                                                                         |
| A/Domestic_goose/Germany-MV/R3298/2009_H6N1      | EPI339177                      |                                | Germany         | 2009*           | -                                                   | Friedrich-Loeffler-Institut                         | -                                                                                                                                                                                                                                                                                                                         |
| A/Mallard/Italy/4518/2007_H10N1                  | EPI511812                      |                                | Italy           | 2007*           | Istituto Zooprofilattico Sperimentale Delle Venezie | Istituto Zooprofilattico Sperimentale Delle Venezie | -                                                                                                                                                                                                                                                                                                                         |
| A/Wild_duck/Germany/WV2555/2006_H3N2             | EPI185342                      |                                | Germany         | 2006*           | -                                                   | Friedrich-Loeffler-Institut                         | -                                                                                                                                                                                                                                                                                                                         |
| A/Pheasant/Ireland/PV12-010728/12_H5N2           | EPI375596                      |                                | Ireland         | 24-Mar-2012     | Central Veterinary Research Laboratory              | Animal and Plant Health Agency (APHA)               | Puranik, A; Thomas, S; Hanna, A; Essen, S; Focosi-Snyman, R; Manvell, R.J; Raleigh, P; Flynn, O; Reid, S                                                                                                                                                                                                                  |

| Isolate name                                      | Accession number<br>HA segment | Accession number<br>NA segment | Country  | Collection Date | Originating Laboratory                              | Submitting Laboratory                               | Authors                                                                                                                                                                                                                                                                                                                                                                                                                                                                                                                          |
|---------------------------------------------------|--------------------------------|--------------------------------|----------|-----------------|-----------------------------------------------------|-----------------------------------------------------|----------------------------------------------------------------------------------------------------------------------------------------------------------------------------------------------------------------------------------------------------------------------------------------------------------------------------------------------------------------------------------------------------------------------------------------------------------------------------------------------------------------------------------|
| A/Chicken/Italy/11VIR-7548/2011_H5N2              |                                | EPI464929                      | Italy    | 28-Dec-2012     | Istituto Zooprofilattico Sperimentale Delle Venezia | Istituto Zooprofilattico Sperimentale Delle Venezia | Monne, I.; Salviato, A.; Tassoni, L.; Cattoli, G.                                                                                                                                                                                                                                                                                                                                                                                                                                                                                |
| A/Turkey/Italy/12VIR-6607-5/2012_H5N2             |                                | EPI464937                      | Italy    | 31-Aug-2012     | Istituto Zooprofilattico Sperimentale Delle Venezia | Istituto Zooprofilattico Sperimentale Delle Venezia | Monne, I.; Salviato, A.; Tassoni, L.; Cattoli, G.                                                                                                                                                                                                                                                                                                                                                                                                                                                                                |
| A/Chicken/Italy/12VIR-7785-67/2012_H5N2           |                                | EPI464945                      | Italy    | 28-Sep-2012     | Istituto Zooprofilattico Sperimentale Delle Venezia | Istituto Zooprofilattico Sperimentale Delle Venezia | Monne, I.; Salviato, A.; Tassoni, L.; Cattoli, G.                                                                                                                                                                                                                                                                                                                                                                                                                                                                                |
| A/Turkey/Italy/12VIR-8036-2/2012_H5N2             |                                | EPI464953                      | Italy    | 28-Jun-2012     | Istituto Zooprofilattico Sperimentale Delle Venezia | Istituto Zooprofilattico Sperimentale Delle Venezia | Monne, I.; Salviato, A.; Tassoni, L.; Cattoli, G.                                                                                                                                                                                                                                                                                                                                                                                                                                                                                |
| A/Mule_duck/Bulgaria/61/2010_mixed                |                                | EPI574173                      | Bulgaria | 10-Jan-2010     | -                                                   | Other database import                               | Marinove-Petkova,A.; Georgiev,G.; Petkov,T.; Darnell,D.; Franks,J.; Walker,D.; Seiler,P.; Danner,A.; Graham,A.; McKenzie,P.; Krauss,S.; Webby,R.J.; Webster,R.G.                                                                                                                                                                                                                                                                                                                                                                 |
| A/Mule_duck/Bulgaria/64/2010_mixed                |                                | EPI574211                      | Bulgaria | 9-Jan-2010      | -                                                   | Other database import                               | Marinove-Petkova,A.; Georgiev,G.; Petkov,T.; Darnell,D.; Franks,J.; Walker,D.; Seiler,P.; Danner,A.; Graham,A.; McKenzie,P.; Krauss,S.; Webby,R.J.; Webster,R.G.                                                                                                                                                                                                                                                                                                                                                                 |
| A/Mule_duck/Bulgaria/369/2009_H4N2                |                                | EPI574213                      | Bulgaria | 16-Mar-2009     | -                                                   | Other database import                               | Marinove-Petkova,A.; Georgiev,G.; Petkov,T.; Darnell,D.; Franks,J.; Walker,D.; Seiler,P.; Danner,A.; Graham,A.; McKenzie,P.; Krauss,S.; Webby,R.J.; Webster,R.G.                                                                                                                                                                                                                                                                                                                                                                 |
| A/Mule_duck/Bulgaria/105/2008_mixed               |                                | EPI574258                      | Bulgaria | 16-Dec-2008     | -                                                   | Other database import                               | Marinove-Petkova,A.; Georgiev,G.; Petkov,T.; Darnell,D.; Franks,J.; Walker,D.; Seiler,P.; Danner,A.; Graham,A.; McKenzie,P.; Krauss,S.; Webby,R.J.; Webster,R.G.                                                                                                                                                                                                                                                                                                                                                                 |
| A/Mule_duck/Bulgaria/174/2009_H6N2                |                                | EPI574265                      | Bulgaria | 12-Jan-2009     | -                                                   | Other database import                               | Marinove-Petkova,A.; Georgiev,G.; Petkov,T.; Darnell,D.; Franks,J.; Walker,D.; Seiler,P.; Danner,A.; Graham,A.; McKenzie,P.; Krauss,S.; Webby,R.J.; Webster,R.G.                                                                                                                                                                                                                                                                                                                                                                 |
| A/Mule_duck/Bulgaria/596/2010_H4N2                |                                | EPI574276                      | Bulgaria | 29-Mar-2010     | -                                                   | Other database import                               | Marinove-Petkova,A.; Georgiev,G.; Petkov,T.; Darnell,D.; Franks,J.; Walker,D.; Seiler,P.; Danner,A.; Graham,A.; McKenzie,P.; Krauss,S.; Webby,R.J.; Webster,R.G.                                                                                                                                                                                                                                                                                                                                                                 |
| A/Ruddy_Turnstone/Delaware/67/98_H12N4            |                                | EPI16616                       | USA      | 1998*           | -                                                   | Other database import                               | -                                                                                                                                                                                                                                                                                                                                                                                                                                                                                                                                |
| A/Pintail/Alaska/314/2005_H12N4                   |                                | EPI307548                      | USA      | 11-Aug-2005     | -                                                   | Other database import                               | The NIAID Influenza Genome Sequencing Consortium                                                                                                                                                                                                                                                                                                                                                                                                                                                                                 |
| A/Red_knot/Delaware_Bay/227/1994_mixed            |                                | EPI345275                      | USA      | 23-May-1994     | -                                                   | Other database import                               | The NIAID Influenza Genome Sequencing Consortium                                                                                                                                                                                                                                                                                                                                                                                                                                                                                 |
| A/Shorebird/Delaware_Bay/215/1994_mixed           |                                | EPI437174                      | USA      | 23-May-1994     | -                                                   | Other database import                               | Wentworth,D.E.; Dugan,V.; Halpin,R.; Lin,X.; Bera,J.; Ghedin,E.; Fedorova,N.; Overton,L.; Tsitrin,T.; Stockwell,T.; Amedeo,P.; Bishop,B.; Chen,H.; Edworthy,P.; Gupta,N.; Katzel,D.; Li,K.; Schobel,S.; Shrivastava,S.; Thovarai,V.; Wang,S.; Runstadler,J.; Lindberg,M.; Huettmann,F.; Petrus,M.; Meixell,B.; Gingrich,J.P.; Gildehaus,L.A.; Vick,L.; Kokx,K.; Dillon,D.; Aldehoff,F.; Felker,E.P.; Marcotte,R.W.; Schmidt,J.C.; Moore,J.R.; Gerdes,K.E.; Rao,Y.; Sanders,R.; Dornovov,D.; Kiryutin,B.; Inman,D.I.; Tatusova,T. |
| A/Ruddy_turnstone/Delaware_Bay/124/1994_mixed     |                                | EPI437442                      | USA      | 22-May-1994     | -                                                   | Other database import                               | Wentworth,D.E.; Dugan,V.; Halpin,R.; Lin,X.; Bera,J.; Ghedin,E.; Fedorova,N.; Overton,L.; Tsitrin,T.; Stockwell,T.; Amedeo,P.; Bishop,B.; Chen,H.; Edworthy,P.; Gupta,N.; Katzel,D.; Li,K.; Schobel,S.; Shrivastava,S.; Thovarai,V.; Wang,S.; Runstadler,J.; Lindberg,M.; Huettmann,F.; Petrus,M.; Meixell,B.; Gingrich,J.P.; Gildehaus,L.A.; Vick,L.; Kokx,K.; Dillon,D.; Aldehoff,F.; Felker,E.P.; Marcotte,R.W.; Schmidt,J.C.; Moore,J.R.; Gerdes,K.E.; Rao,Y.; Sanders,R.; Dornovov,D.; Kiryutin,B.; Inman,D.I.; Tatusova,T. |
| A/Ruddy_turnstone/Delaware_Bay/150/1994_H1N4      |                                | EPI437470                      | USA      | 22-May-1994     | -                                                   | Other database import                               | Wentworth,D.E.; Dugan,V.; Halpin,R.; Lin,X.; Bera,J.; Ghedin,E.; Fedorova,N.; Overton,L.; Tsitrin,T.; Stockwell,T.; Amedeo,P.; Bishop,B.; Chen,H.; Edworthy,P.; Gupta,N.; Katzel,D.; Li,K.; Schobel,S.; Shrivastava,S.; Thovarai,V.; Wang,S.; Runstadler,J.; Lindberg,M.; Huettmann,F.; Petrus,M.; Meixell,B.; Gingrich,J.P.; Gildehaus,L.A.; Vick,L.; Kokx,K.; Dillon,D.; Aldehoff,F.; Felker,E.P.; Marcotte,R.W.; Schmidt,J.C.; Moore,J.R.; Gerdes,K.E.; Rao,Y.; Sanders,R.; Dornovov,D.; Kiryutin,B.; Inman,D.I.; Tatusova,T. |
| A/Blue-winged_teal/ALB/685/1982_H6N4              |                                | EPI85929                       | Canada   | 20-Aug-1982     | -                                                   | Other database import                               | -                                                                                                                                                                                                                                                                                                                                                                                                                                                                                                                                |
| A/Mallard_duck/Alberta/299/1977_H4N4              |                                | EPI87231                       | Canada   | 10-Aug-1977     | -                                                   | Other database import                               | -                                                                                                                                                                                                                                                                                                                                                                                                                                                                                                                                |
| A/Mallard/Alberta/194/1992_H8N4                   |                                | EPI87925                       | Canada   | 1-Dec-1992      | -                                                   | Other database import                               | -                                                                                                                                                                                                                                                                                                                                                                                                                                                                                                                                |
| A/Duck/Hokkaido/24/04_H10N5                       |                                | EPI160652                      | Japan    | 2004*           | -                                                   | Other database import                               | -                                                                                                                                                                                                                                                                                                                                                                                                                                                                                                                                |
| A/Mallard/Denmark/77-64590-5/2005_H7N5            |                                | EPI174859                      | Denmark  | 19-Sep-2005     | Technical University of Denmark                     | National Veterinary Institute                       | -                                                                                                                                                                                                                                                                                                                                                                                                                                                                                                                                |
| A/Mallard/California/6524/2008_H12N5              |                                | EPI328292                      | USA      | 5-Nov-2008      | -                                                   | Other database import                               | The NIAID Influenza Genome Sequencing Consortium                                                                                                                                                                                                                                                                                                                                                                                                                                                                                 |
| A/Mallard/Alberta/220/2006_                       |                                | EPI343416                      | Canada   | 9-Aug-2006      | -                                                   | Other database import                               | The NIAID Influenza Genome Sequencing Consortium                                                                                                                                                                                                                                                                                                                                                                                                                                                                                 |
| A/Mallard/Alberta/12/1993_                        |                                | EPI344668                      | Canada   | 20-Aug-1993     | -                                                   | Other database import                               | The NIAID Influenza Genome Sequencing Consortium                                                                                                                                                                                                                                                                                                                                                                                                                                                                                 |
| A/Arenaria_interpres/Belgium/02936pcs1/2010_H12N5 |                                | EPI345387                      | Belgium  | 27-Feb-2010     | Veterinary and Agrochemical Research Institute      | Veterinary and Agrochemical Research Institute      | Van Borm,S.; Rosseel,T.; Lambrecht,B.; Vangeluwe,D.; Vandenbussche,F.; van den Berg,T.                                                                                                                                                                                                                                                                                                                                                                                                                                           |
| A/Mallard/Ohio/170/1999_H6N5                      |                                | EPI44086                       | USA      | 23-Oct-1999     | -                                                   | Other database import                               | -                                                                                                                                                                                                                                                                                                                                                                                                                                                                                                                                |
| A/Emperor_goose/Alaska/44064-075/2006_H2N5        |                                | EPI442443                      | USA      | 25-May-2006     | -                                                   | Other database import                               | Reeves,A.B.; Pearce,J.M.; Ramey,A.M.; Ely,C.R.; Schmutz,J.A.; Flint,P.L.; Derksen,D.V.; Ip,H.S.; Trust,K.A.                                                                                                                                                                                                                                                                                                                                                                                                                      |
| A/Mallard/Minnesota/182729/1998_H6N5              |                                | EPI448392                      | USA      | 1-Sep-1998      | -                                                   | Other database import                               | Wentworth,D.E.; Dugan,V.; Halpin,R.; Lin,X.; Bera,J.; Wester,E.; Ghedin,E.; Fedorova,N.; Tsitrin,T.; Stockwell,T.; Amedeo,P.; Bishop,B.; Edworthy,P.; Gupta,N.; Katzel,D.; Li,K.; Schobel,S.; Shrivastava,S.; Thovarai,V.; Wang,S.; Lebarbenchon,C.; Sreevatsan,S.; Poulson,B.; Yang,M.; Stallknecht,D.; Bao,Y.; Sanders,R.; Dornovov,D.; Kiryutin,B.; Lioman,D.J.; Tatusova,T.                                                                                                                                                  |
| A/Green-winged_teal/Minnesota/Sg-00820/2008_H4N5  |                                | EPI449492                      | USA      | 3-Sep-2008      | -                                                   | Other database import                               | Wentworth,D.E.; Dugan,V.; Halpin,R.; Lin,X.; Bera,J.; Wester,E.; Ghedin,E.; Fedorova,N.; Tsitrin,T.; Stockwell,T.; Amedeo,P.; Bishop,B.; Edworthy,P.; Gupta,N.; Katzel,D.; Li,K.; Schobel,S.; Shrivastava,S.; Thovarai,V.; Wang,S.; Lebarbenchon,C.; Sreevatsan,S.; Poulson,B.; Yang,M.; Stallknecht,D.; Bao,Y.; Sanders,R.; Dornovov,D.; Kiryutin,B.; Lioman,D.J.; Tatusova,T.                                                                                                                                                  |
| A/Ruddy_turnstone/New_Jersey/AI07-697/2007_H12N5  |                                | EPI454987                      | USA      | 10-Aug-2007     | -                                                   | Other database import                               | Wentworth,D.E.; Dugan,V.; Halpin,R.; Lin,X.; Bera,J.; Wester,E.; Ghedin,E.; Fedorova,N.; Tsitrin,T.; Stockwell,T.; Amedeo,P.; Bishop,B.; Edworthy,P.; Gupta,N.; Katzel,D.; Li,K.; Schobel,S.; Shrivastava,S.; Thovarai,V.; Wang,S.; Lebarbenchon,C.; Sreevatsan,S.; Poulson,B.; Yang,M.; Stallknecht,D.; Bao,Y.; Sanders,R.; Dornovov,D.; Kiryutin,B.; Lioman,D.J.; Tatusova,T.                                                                                                                                                  |

| Isolate name                                     | Accession number<br>HA segment | Accession number<br>NA segment | Country     | Collection Date | Originating Laboratory                 | Submitting Laboratory                  | Authors                                                                                                                                                                                                                                                                                                                                                                           |
|--------------------------------------------------|--------------------------------|--------------------------------|-------------|-----------------|----------------------------------------|----------------------------------------|-----------------------------------------------------------------------------------------------------------------------------------------------------------------------------------------------------------------------------------------------------------------------------------------------------------------------------------------------------------------------------------|
| A/Ruddy_turnstone/New_Jersey/AI07-803/2007_H12N5 |                                | EPI455001                      | USA         | 16-Aug-2007     | -                                      | Other database import                  | Wentworth,D.E.; Dugan,V.; Halpin,R.; Lin,X.; Bera,J.; Wester,E.; Ghedin,E.; Fedorova,N.; Tsitirin,T.; Stockwell,T.; Amedeo,P.; Bishop,B.; Edworthy,P.; Gupta,N.; Katznel,D.; Li,K.; Schobel,S.; Shrivastava,S.; Thovarai,V.; Wang,S.; Lebarbenchon,C.; Sreevatsan,S.; Poulson,B.; Yang,M.; Stallknecht,D.; Bao,Y.; Sanders,R.; Dernovoy,D.; Kiryutin,B.; Linman,D.I.; Tatusova,T. |
| A/Mule_duck/Bulgaria/674/2010_H6N5               |                                | EPI574266                      | Bulgaria    | 12-Apr-2010     | -                                      | Other database import                  | Marinove-Petkova,A.; Georgiev,G.; Petkov,T.; Darnell,D.; Franks,J.; Walker,D.; Seiler,P.; Dannen,A.; Graham,A.; McKenzie,P.; Krauss,S.; Webby,R.J.; Webster,R.G.                                                                                                                                                                                                                  |
| A/Mallard/Alberta/202/1996_H2N5                  |                                | EPI85385                       | Canada      | 1996*           | -                                      | Other database import                  | -                                                                                                                                                                                                                                                                                                                                                                                 |
| A/Pintail/Alberta/49/2003_H9N5                   |                                | EPI86317                       | Canada      | 2003*           | -                                      | Other database import                  | -                                                                                                                                                                                                                                                                                                                                                                                 |
| A/Mallard/Alberta/52/1997_H12N5                  |                                | EPI86417                       | Canada      | 31-Oct-1997     | -                                      | Other database import                  | -                                                                                                                                                                                                                                                                                                                                                                                 |
| A/Green-winged_teal/ALB/199/1991_H12N5           |                                | EPI88775                       | Canada      | 26-Aug-1991     | -                                      | Other database import                  | -                                                                                                                                                                                                                                                                                                                                                                                 |
| A/Mallard/Poland/16/09_H7N7                      |                                | EPI254380                      | Poland      | 12-Jan-2009     | National Veterinary Research Institute | National Veterinary Research Institute | -                                                                                                                                                                                                                                                                                                                                                                                 |
| A/Turkey/Netherlands/03003568/03_H7N7            |                                | EPI290239                      | Netherlands | 9-Mar-2003      | -                                      | Central Veterinary Institute           | -                                                                                                                                                                                                                                                                                                                                                                                 |
| A/Chicken/Germany/R1801/2011_H7N7                |                                | EPI356304                      | Germany     | 2011*           | -                                      | Friedrich-Loeffler-Institut            | -                                                                                                                                                                                                                                                                                                                                                                                 |
| A/Turkey/Germany/R1775/2011_H7N7                 |                                | EPI356305                      | Germany     | 2011*           | -                                      | Friedrich-Loeffler-Institut            | -                                                                                                                                                                                                                                                                                                                                                                                 |
| A/Turkey/Germany-NI/R534/2013_H7N7               |                                | EPI470367                      | Germany     | 11-Apr-2013     | -                                      | Friedrich-Loeffler-Institut            | -                                                                                                                                                                                                                                                                                                                                                                                 |
