# Supplementary material for: Discordant detection of avian influenza virus subtypes in time and space between poultry and wild birds; Towards improvement of surveillance programs
Source: PubMed Central journal article supplement (PMC5344487; doi:10.1371/journal.pone.0173470), 2017-03-09
Supplement: pone.0173470.s005.pdf [file pone.0173470.s005.pdf]

## Supporting Information

**S3 Table. Avian influenza virus hemagglutinin and neuraminidase subtype distribution among poultry and wild bird species, the Netherlands, 2006 - 2011.** Number and percentage (between brackets) of hemagglutinin (A) and neuraminidase (B) subtypes are shown for poultry and wild bird species. Poultry subtypes are shown for primary and secondary cases (i.e. all combined) and separate for primary cases only (i.e. primary cases). Subtypes indicated with an asterisk were significantly more or less frequently detected in the corresponding group than in all wild birds combined, with \* =  $P < 0.05$  and \*\* =  $P < 0.01$  (Fisher's exact test).

### A

| Subtype | Poultry      |               | Wild birds   |              |                    |               |              |                 |               |
|---------|--------------|---------------|--------------|--------------|--------------------|---------------|--------------|-----------------|---------------|
|         | All combined | Primary cases | All combined | Anseriformes |                    |               |              | Charadriiformes |               |
|         |              |               |              | Mallard      | Other duck species | Goose species | Swan species | Gull species    | Wader species |
|         | 70           | 20            | 542          | 250 (46)     | 20 (4)             | 40 (7)        | 16 (3)       | 201 (37)        | 15 (3)        |
| H1      | 11 (16)**    | 2 (10)        | 30 (6)       | 18 (7)       | 2 (10)             | 5 (13)        | 4 (25)       | 1 (<1)          | -             |
| H2      | 2 (3)        | 1 (5)         | 11 (2)       | 10 (4)       | 1 (5)              | -             | -            | -               | -             |
| H3      | -            | -             | 89 (16)      | 75 (30)**    | 3 (15)             | -             | 1 (6)        | -               | 10 (67)**     |
| H4      | -            | -             | 58 (11)      | 49 (20)**    | 1 (5)              | -             | 5 (31)*      | 3 (1)           | -             |
| H5      | 9 (13)**     | 1 (5)         | 25 (5)       | 15 (6)       | 2 (10)             | 7 (18)**      | 1 (6)        | -               | -             |
| H6      | 10 (14)      | 3 (15)        | 53 (10)      | 23 (9)       | 4 (20)             | 25 (63)**     | 1 (6)        | -               | -             |
| H7      | 15 (21)**    | 6 (30)        | 26 (5)       | 22 (9)*      | 1 (5)              | 2 (5)         | 1 (6)        | -               | -             |
| H8      | 15 (21)**    | 1 (5)         | 5 (1)        | 4 (2)        | 1 (5)              | -             | -            | -               | -             |
| H9      | 5 (7)**      | 4 (20)        | 5 (1)        | -            | 2 (10)*            | 1 (3)         | 2 (13)*      | -               | -             |
| H10     | 3 (4)        | 2 (10)        | 34 (6)       | 25 (10)      | 2 (10)             | -             | 1 (6)        | 1 (<1)          | 5 (33)**      |
| H11     | -            | -             | 9 (2)        | 7 (3)        | -                  | -             | -            | 2 (1)           | -             |
| H12     | -            | -             | 3 (1)        | 2 (1)        | 1 (5)              | -             | -            | -               | -             |
| H13     | -            | -             | 111 (20)     | -            | -                  | -             | -            | 111 (55)**      | -             |
| H16     | -            | -             | 83 (15)      | -            | -                  | -             | -            | 83 (41)**       | -             |

### B

| Subtype | Poultry      |               | Wild birds   |              |                    |               |              |                 |               |
|---------|--------------|---------------|--------------|--------------|--------------------|---------------|--------------|-----------------|---------------|
|         | All combined | Primary cases | All combined | Anseriformes |                    |               |              | Charadriiformes |               |
|         |              |               |              | Mallard      | Other duck species | Goose species | Swan species | Gull species    | Wader species |
|         | 32           | 11            | 542          | 250 (46)     | 20 (4)             | 40 (7)        | 16 (3)       | 201 (37%)       | 15 (3)        |
| N1      | 5 (16)       | 2 (18)        | 57 (11)      | 35 (14)      | 8 (40)**           | 9 (23)*       | 4 (25)       | 1 (<1)**        | -             |
| N2      | 2 (6)        | 2 (18)        | 79 (15)      | 37 (15)      | 5 (25)             | 13 (33)**     | 3 (19)       | 21 (10)         | -             |
| N3      | 2 (6)        | 2 (18)        | 105 (19)     | 19 (8)**     | 1 (5)              | 1 (3)**       | -            | 84 (42)**       | -             |
| N4      | 6 (19)**     | 1 (9)         | 12 (2)       | 5 (2)        | 1 (5)              | -             | -            | 1 (<1)          | 5 (33)**      |
| N5      | 8 (25)**     | 1 (9)         | 14 (3)       | 10 (4)       | 1 (5)              | 1 (3)         | 1 (6)        | 1 (<1)          | -             |
| N6      | -            | -             | 62 (11)      | 49 (20)**    | -                  | -             | 6 (38)**     | 7 (3)**         | -             |
| N7      | 8 (25)**     | 3 (27)        | 27 (5)       | 26 (10)**    | -                  | -             | 1 (6)        | -               | -             |
| N8      | 1 (3)**      | -             | 179 (33)     | 63 (25)*     | 4 (20)             | 16 (40)       | 1 (6)*       | 85 (42)*        | 10 (67)*      |
| N9      | -            | -             | 7 (1)        | 6 (2)        | -                  | -             | -            | 1 (<1)          | -             |
